# Supplementary material for: Novel phenylpropanoid–amino acid adducts fromLigusticum chuanxiong
Source: Royal Society of Chemistry journal article supplement (doi:10.1039/c8qo00012c), 2018-01-01
Supplement: c8qo00012c1.pdf [file c8qo00012c1.pdf]

*Supporting information*

**Novel phenylpropanoid-amino acid adducts from**  
***Ligusticum chuanxiong***

Xu Zhang, Bing Han, Zi-Ming Feng, Ya-Nan Yang, Jian-Shuang Jiang, and Pei-Cheng Zhang\*

State Key Laboratory of Bioactive Substance and Function of Natural Medicines, Institute of Materia Medica, Chinese Academy of Medical Sciences and Peking Union Medical College, Beijing 100050, People's Republic of China

Corresponding author. Tel: +86-10-63165231. Fax: +86-10-63017757.

E-mail: [pczhang@imm.ac.cn](mailto:pczhang@imm.ac.cn)

**Table of Contents**

| No. | Contents                                                                                  | Compounds | Page |
|-----|-------------------------------------------------------------------------------------------|-----------|------|
| 1   | The <sup>1</sup> H NMR spectrum in DMSO- <i>d</i> <sub>6</sub> (500 MHz)                  | 1         | S4   |
| 2   | The <sup>13</sup> C NMR spectrum in DMSO- <i>d</i> <sub>6</sub> (500 MHz)                 | 1         | S4   |
| 3   | The HSQC spectrum in DMSO- <i>d</i> <sub>6</sub> (500 MHz)                                | 1         | S5   |
| 4   | The HMBC spectrum in DMSO- <i>d</i> <sub>6</sub> (500 MHz)                                | 1         | S5   |
| 5   | The UV spectrum in MeOH                                                                   | 1         | S6   |
| 6   | The IR spectrum                                                                           | 1         | S6   |
| 7   | The HR-ESI-MS data                                                                        | 1         | S7   |
| 8   | The <sup>1</sup> H NMR spectrum in DMSO- <i>d</i> <sub>6</sub> (500 MHz)                  | 2         | S8   |
| 9   | The <sup>13</sup> C NMR spectrum in DMSO- <i>d</i> <sub>6</sub> (500 MHz)                 | 2         | S8   |
| 10  | The HSQC spectrum in DMSO- <i>d</i> <sub>6</sub> (500 MHz)                                | 2         | S9   |
| 11  | The HMBC spectrum in DMSO- <i>d</i> <sub>6</sub> (500 MHz)                                | 2         | S9   |
| 12  | The <sup>1</sup> H- <sup>1</sup> H COSY spectrum in DMSO- <i>d</i> <sub>6</sub> (500 MHz) | 2         | S10  |
| 13  | The UV spectrum in MeOH                                                                   | 2         | S10  |
| 14  | The IR spectrum                                                                           | 2         | S11  |
| 15  | The HR-ESI-MS data                                                                        | 2         | S12  |
| 16  | The <sup>1</sup> H NMR spectrum in DMSO- <i>d</i> <sub>6</sub> (500 MHz)                  | 3         | S13  |
| 17  | The <sup>13</sup> C NMR spectrum in DMSO- <i>d</i> <sub>6</sub> (500 MHz)                 | 3         | S13  |
| 18  | The HSQC spectrum in DMSO- <i>d</i> <sub>6</sub> (500 MHz)                                | 3         | S14  |
| 19  | The HMBC spectrum in DMSO- <i>d</i> <sub>6</sub> (500 MHz)                                | 3         | S14  |
| 20  | The UV spectrum in MeOH                                                                   | 3         | S15  |
| 21  | The IR spectrum                                                                           | 3         | S15  |
| 22  | The HR-ESI-MS data                                                                        | 3         | S16  |

---

|    |                                                                                           |   |     |
|----|-------------------------------------------------------------------------------------------|---|-----|
| 23 | The <sup>1</sup> H NMR spectrum in DMSO- <i>d</i> <sub>6</sub> (500 MHz)                  | 4 | S17 |
| 24 | The <sup>13</sup> C NMR spectrum in DMSO- <i>d</i> <sub>6</sub> (500 MHz)                 | 4 | S17 |
| 25 | The HSQC spectrum in DMSO- <i>d</i> <sub>6</sub> (500 MHz)                                | 4 | S18 |
| 26 | The HMBC spectrum in DMSO- <i>d</i> <sub>6</sub> (500 MHz)                                | 4 | S18 |
| 27 | The UV spectrum in MeOH                                                                   | 4 | S19 |
| 28 | The IR spectrum                                                                           | 4 | S19 |
| 29 | The HR-ESI-MS data                                                                        | 4 | S20 |
| 30 | The <sup>1</sup> H NMR spectrum in DMSO- <i>d</i> <sub>6</sub> (500 MHz)                  | 5 | S21 |
| 31 | The <sup>13</sup> C NMR spectrum in DMSO- <i>d</i> <sub>6</sub> (500 MHz)                 | 5 | S21 |
| 32 | The HSQC spectrum in DMSO- <i>d</i> <sub>6</sub> (500 MHz)                                | 5 | S22 |
| 33 | The HMBC spectrum in DMSO- <i>d</i> <sub>6</sub> (500 MHz)                                | 5 | S22 |
| 34 | The UV spectrum in MeOH                                                                   | 5 | S23 |
| 35 | The IR spectrum                                                                           | 5 | S23 |
| 36 | The HR-ESI-MS data                                                                        | 5 | S24 |
| 37 | The <sup>1</sup> H NMR spectrum in DMSO- <i>d</i> <sub>6</sub> (500 MHz)                  | 6 | S25 |
| 38 | The <sup>13</sup> C NMR spectrum in DMSO- <i>d</i> <sub>6</sub> (500 MHz)                 | 6 | S25 |
| 39 | The HSQC spectrum in DMSO- <i>d</i> <sub>6</sub> (500 MHz)                                | 6 | S26 |
| 40 | The HMBC spectrum in DMSO- <i>d</i> <sub>6</sub> (500 MHz)                                | 6 | S26 |
| 41 | The <sup>1</sup> H- <sup>1</sup> H COSY spectrum in DMSO- <i>d</i> <sub>6</sub> (500 MHz) | 6 | S27 |
| 42 | The UV spectrum in MeOH                                                                   | 6 | S27 |
| 43 | The IR spectrum                                                                           | 6 | S28 |
| 44 | The HR-ESI-MS data                                                                        | 6 | S29 |
| 45 | The <sup>1</sup> H NMR spectrum in DMSO- <i>d</i> <sub>6</sub> (500 MHz)                  | 7 | S30 |
| 46 | The <sup>13</sup> C NMR spectrum in DMSO- <i>d</i> <sub>6</sub> (500 MHz)                 | 7 | S30 |
| 47 | The HSQC spectrum in DMSO- <i>d</i> <sub>6</sub> (500 MHz)                                | 7 | S31 |
| 48 | The HMBC spectrum in DMSO- <i>d</i> <sub>6</sub> (500 MHz)                                | 7 | S31 |
| 49 | The UV spectrum in MeOH                                                                   | 7 | S32 |
| 50 | The IR spectrum                                                                           | 7 | S32 |
| 51 | The HR-ESI-MS data                                                                        | 7 | S33 |
| 52 | The <sup>1</sup> H NMR spectrum in DMSO- <i>d</i> <sub>6</sub> (500 MHz)                  | 8 | S34 |
| 53 | The <sup>13</sup> C NMR spectrum in DMSO- <i>d</i> <sub>6</sub> (500 MHz)                 | 8 | S34 |
| 54 | The HSQC spectrum in DMSO- <i>d</i> <sub>6</sub> (500 MHz)                                | 8 | S35 |
| 55 | The HMBC spectrum in DMSO- <i>d</i> <sub>6</sub> (500 MHz)                                | 8 | S35 |
| 56 | The UV spectrum in MeOH                                                                   | 8 | S36 |
| 57 | The IR spectrum                                                                           | 8 | S36 |
| 58 | The HR-ESI-MS data                                                                        | 8 | S37 |
| 59 | The <sup>1</sup> H NMR spectrum in DMSO- <i>d</i> <sub>6</sub> (500 MHz)                  | 9 | S38 |

---

|           |                                                                                  |            |            |
|-----------|----------------------------------------------------------------------------------|------------|------------|
| <b>60</b> | The <sup>13</sup> C NMR spectrum in DMSO- <i>d</i> <sub>6</sub> (500 MHz)        | <b>9</b>   | <b>S38</b> |
| <b>61</b> | The HR-ESI-MS data                                                               | <b>9</b>   | <b>S39</b> |
| <b>62</b> | The <sup>1</sup> H NMR spectrum in DMSO- <i>d</i> <sub>6</sub> (500 MHz)         | <b>10</b>  | <b>S40</b> |
| <b>63</b> | The <sup>13</sup> C NMR spectrum in DMSO- <i>d</i> <sub>6</sub> (500 MHz)        | <b>10</b>  | <b>S40</b> |
| <b>64</b> | The HR-ESI-MS data                                                               | <b>10</b>  | <b>S41</b> |
| <b>65</b> | The <sup>1</sup> H NMR spectrum in acetic acid- <i>d</i> <sub>4</sub> (500 MHz)  | <b>1b</b>  | <b>S42</b> |
| <b>66</b> | The <sup>13</sup> C NMR spectrum in acetic acid- <i>d</i> <sub>4</sub> (500 MHz) | <b>1b</b>  | <b>S42</b> |
| <b>67</b> | The HR-ESI-MS data                                                               | <b>1b</b>  | <b>S43</b> |
| <b>68</b> | The <sup>1</sup> H NMR spectrum in acetic acid- <i>d</i> <sub>4</sub> (500 MHz)  | <b>2b</b>  | <b>S44</b> |
| <b>69</b> | The <sup>13</sup> C NMR spectrum in acetic acid- <i>d</i> <sub>4</sub> (500 MHz) | <b>2b</b>  | <b>S44</b> |
| <b>70</b> | The HR-ESI-MS data                                                               | <b>2b</b>  | <b>S45</b> |
| <b>71</b> | The <sup>1</sup> H NMR spectrum in acetic acid- <i>d</i> <sub>4</sub> (500 MHz)  | <b>3b</b>  | <b>S46</b> |
| <b>72</b> | The <sup>13</sup> C NMR spectrum in acetic acid- <i>d</i> <sub>4</sub> (500 MHz) | <b>3b</b>  | <b>S46</b> |
| <b>73</b> | The HR-ESI-MS data                                                               | <b>3b</b>  | <b>S47</b> |
| <b>74</b> | The <sup>1</sup> H NMR spectrum in acetic acid- <i>d</i> <sub>4</sub> (500 MHz)  | <b>4b</b>  | <b>S48</b> |
| <b>75</b> | The <sup>13</sup> C NMR spectrum in acetic acid- <i>d</i> <sub>4</sub> (500 MHz) | <b>4b</b>  | <b>S48</b> |
| <b>76</b> | The HR-ESI-MS data                                                               | <b>4b</b>  | <b>S49</b> |
| <b>77</b> | The <sup>1</sup> H NMR spectrum in acetic acid- <i>d</i> <sub>4</sub> (600 MHz)  | <b>5b</b>  | <b>S50</b> |
| <b>78</b> | The <sup>13</sup> C NMR spectrum in acetic acid- <i>d</i> <sub>4</sub> (600 MHz) | <b>5b</b>  | <b>S50</b> |
| <b>79</b> | The HR-ESI-MS data                                                               | <b>5b</b>  | <b>S51</b> |
| <b>80</b> | The Gas Chromatographic separation of D-Glc                                      |            | <b>S52</b> |
| <b>81</b> | The Gas Chromatographic analyses of sugar moieties                               | <b>7-8</b> | <b>S52</b> |
| <b>82</b> | The neuroprotective effects of <b>1-10</b>                                       |            | <b>S52</b> |

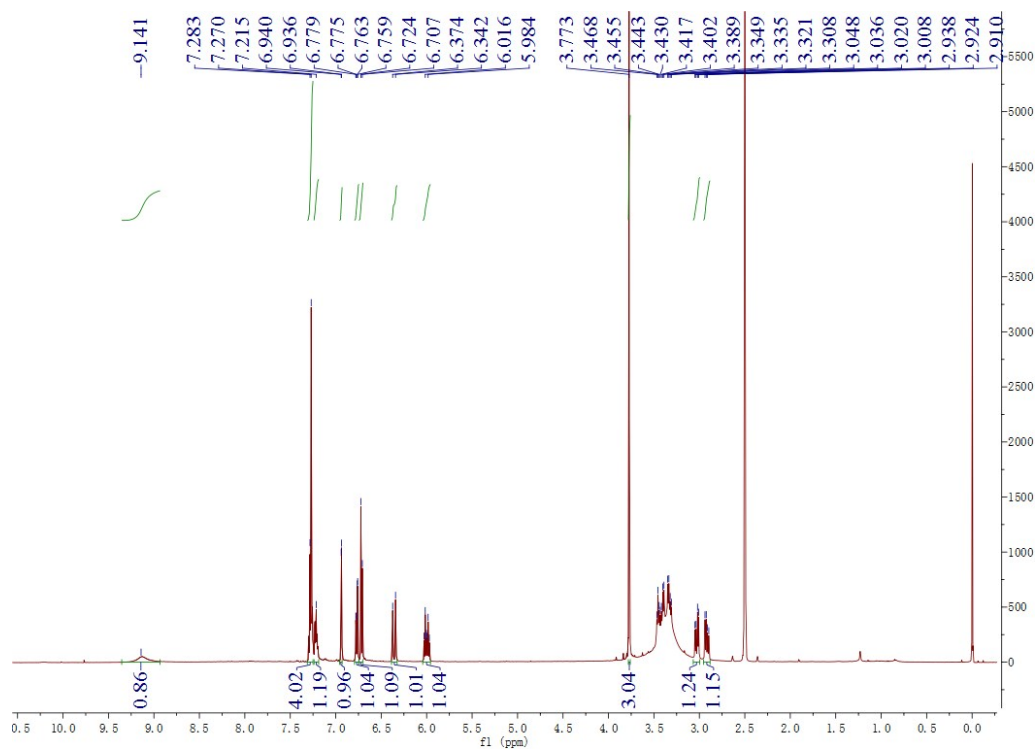

Figure S1. The  $^1\text{H}$  NMR spectrum of compound **1** in  $\text{DMSO-}d_6$

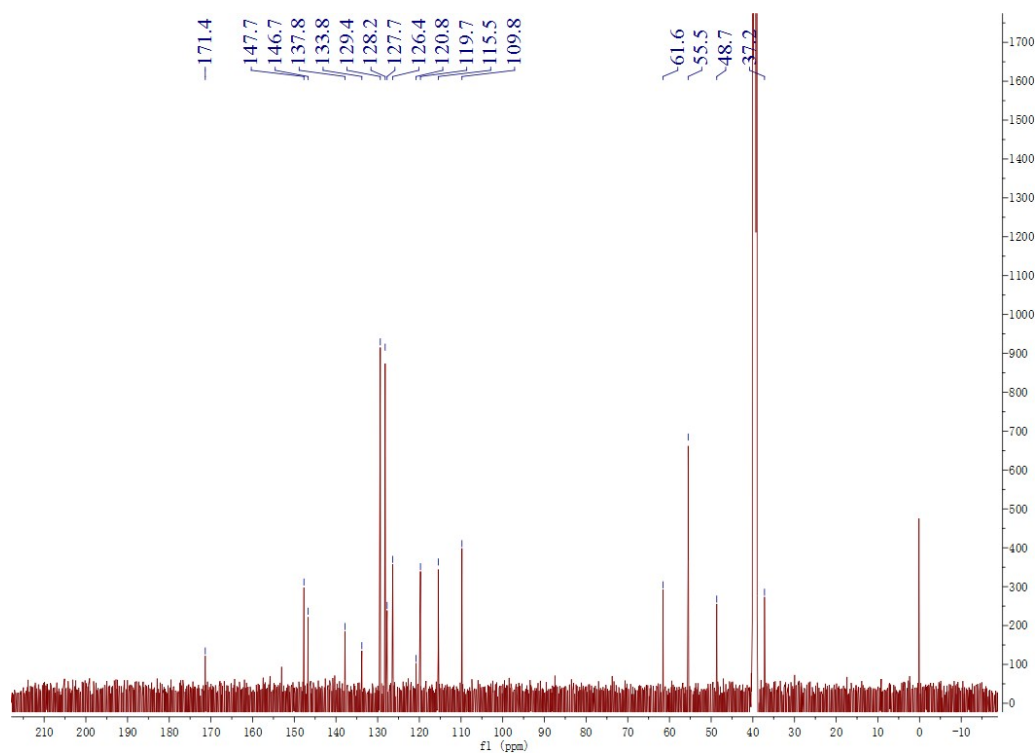

Figure S2. The  $^{13}\text{C}$  NMR spectrum of compound **1** in  $\text{DMSO-}d_6$

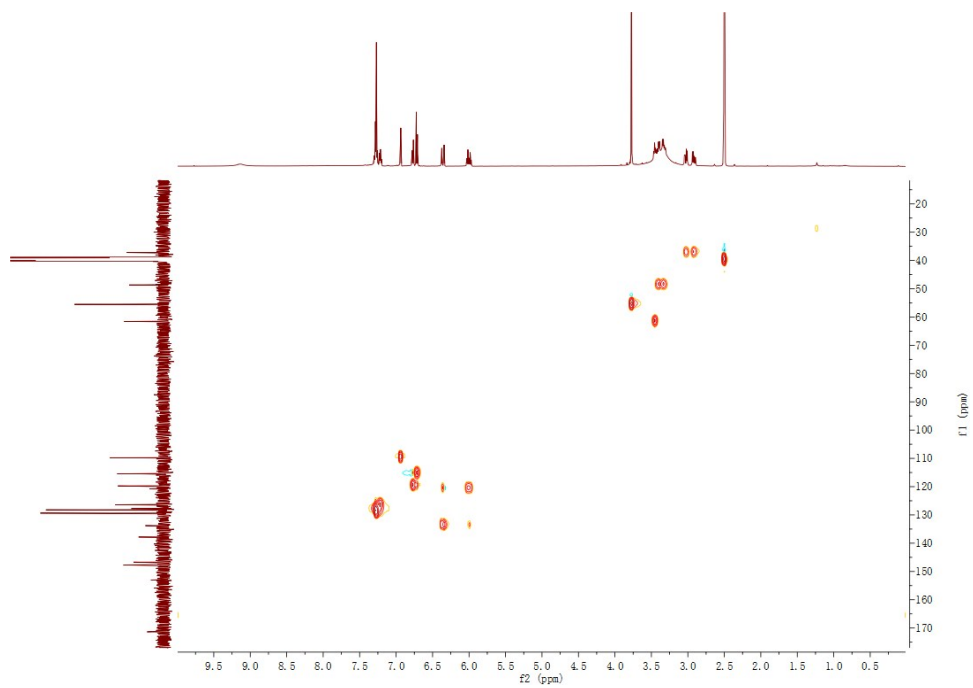

**Figure S3.** The HSQC spectrum of compound **1** in DMSO- $d_6$

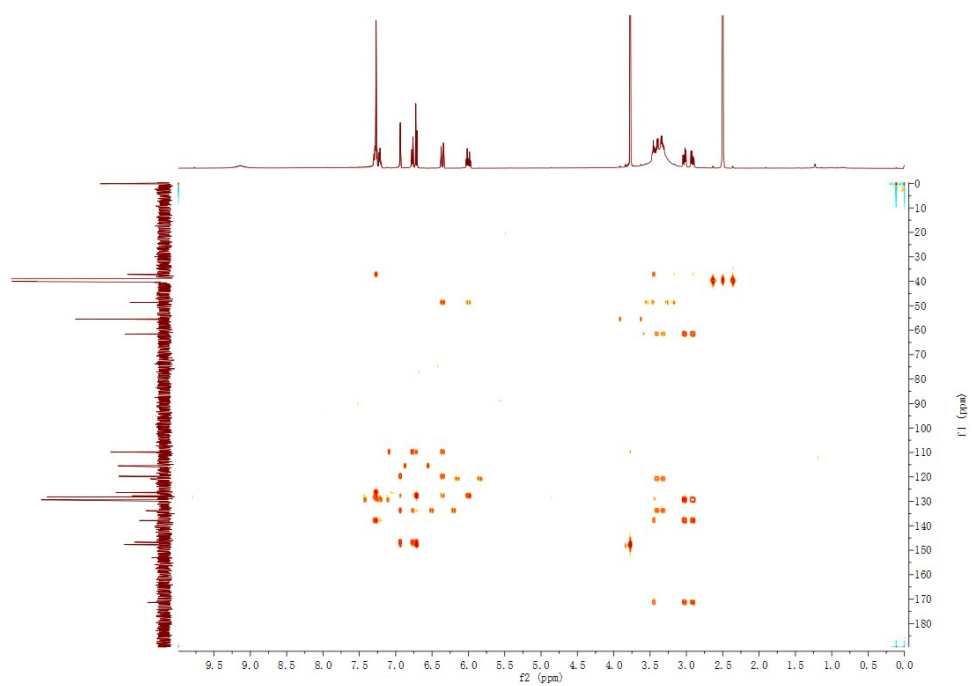

**Figure S4.** The HMBC spectrum of compound **1** in DMSO- $d_6$

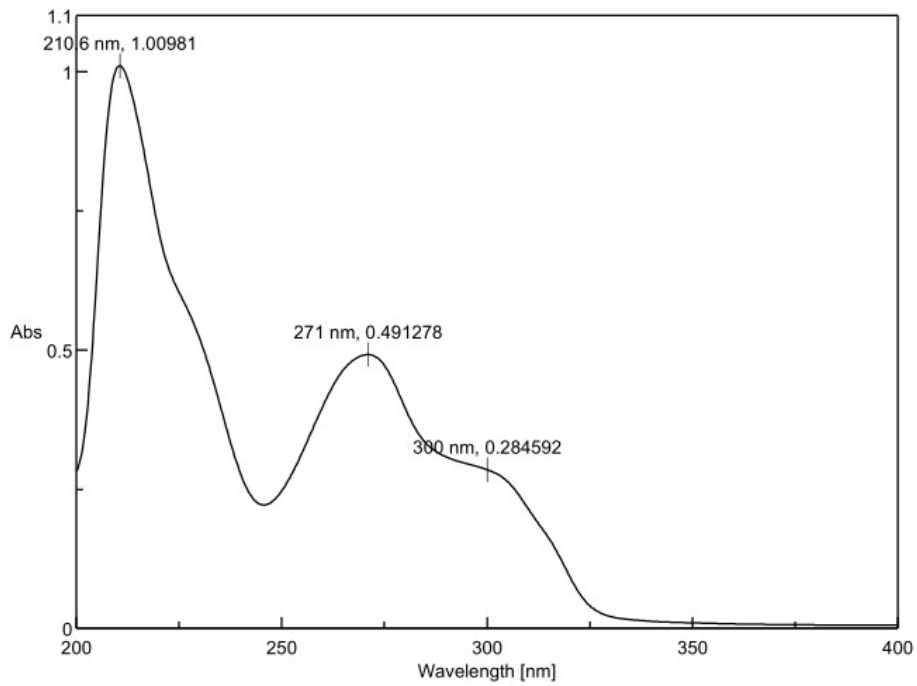

Figure S5. The UV spectrum of compound **1** in MeOH

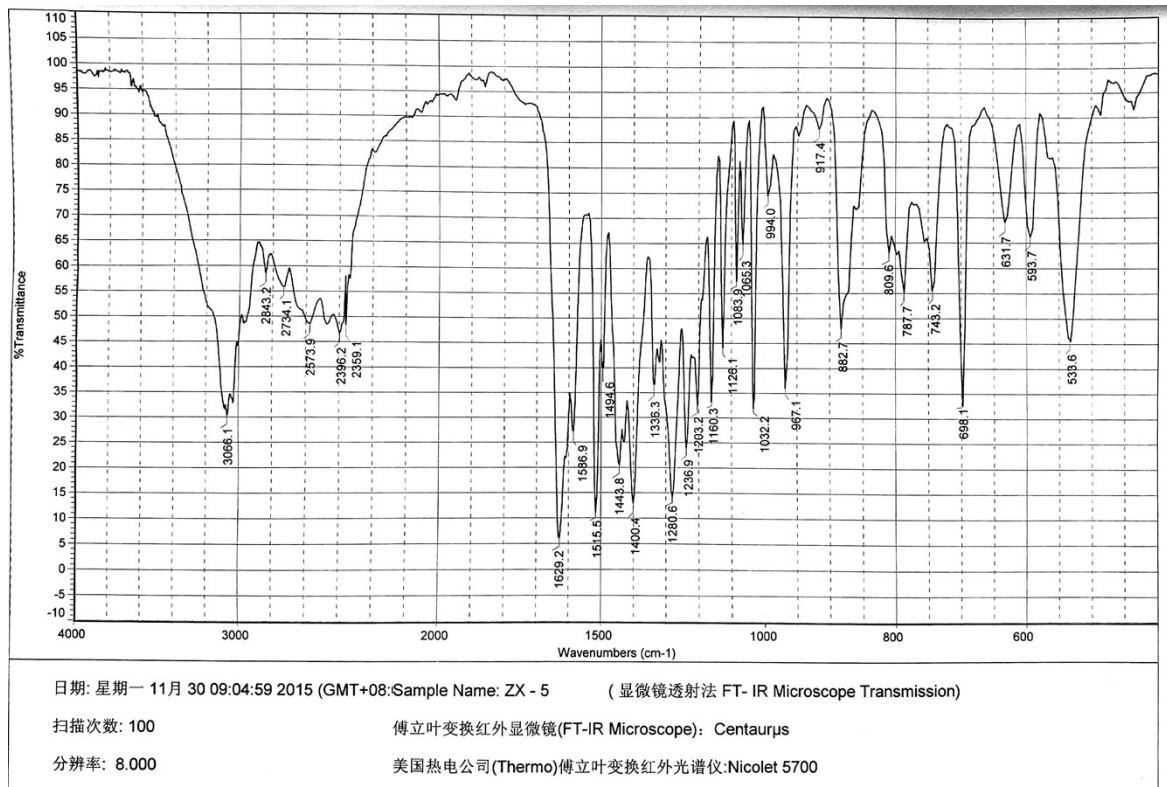

Figure S6. The IR spectrum of compound **1**

Event#: 1 MS(E+) Ret. Time : 6.787 Scan#: 1310

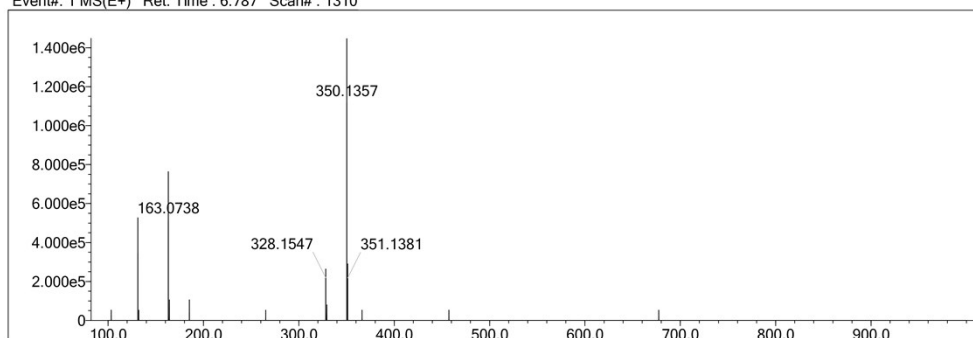

Measured region for 328.1547 m/z

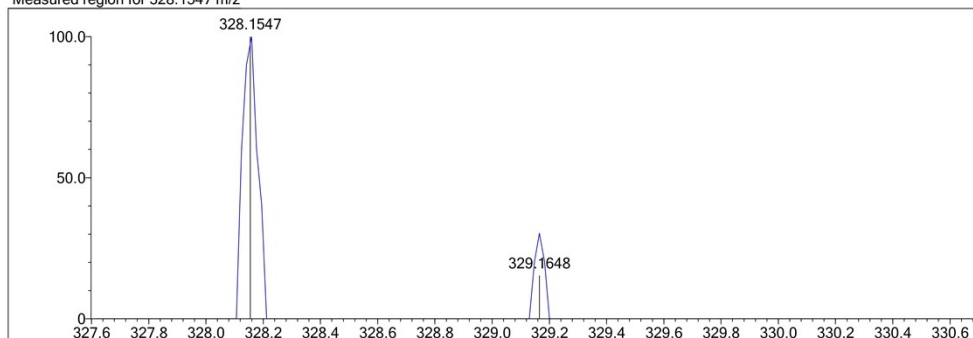

C19 H21 N O4 [M+H]<sup>+</sup> : Predicted region for 328.1543 m/z

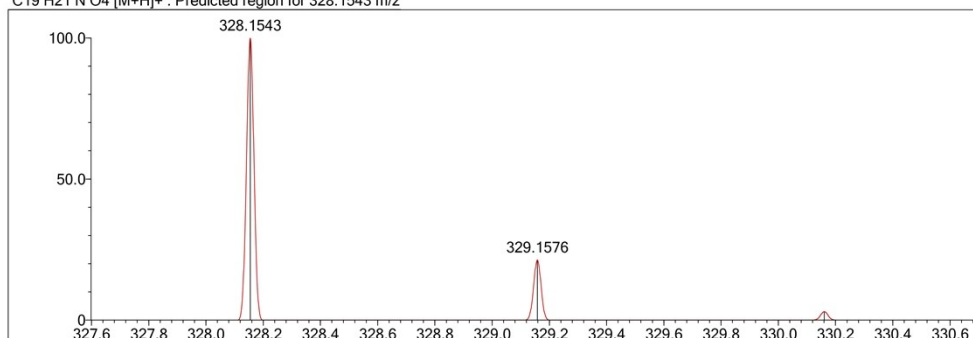

| Rank | Score | Formula (M)  | Ion                | Meas. m/z | Pred. m/z | Df. (mDa) | Df. (ppm) | Iso   | DBE  |
|------|-------|--------------|--------------------|-----------|-----------|-----------|-----------|-------|------|
| 1    | 55.64 | C19 H21 N O4 | [M+H] <sup>+</sup> | 328.1547  | 328.1543  | 0.4       | 1.22      | 55.95 | 10.0 |

**Figure S7.** The HR-ESI-MS data of compound **1**

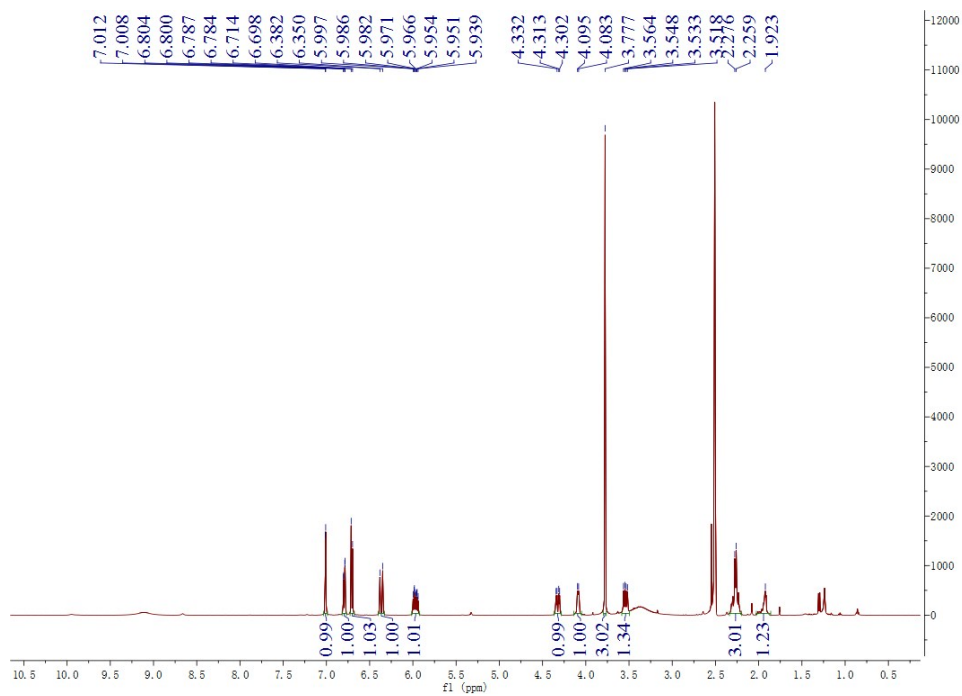

**Figure S8.** The  $^1\text{H}$  NMR spectrum of compound **2** in  $\text{DMSO-}d_6$

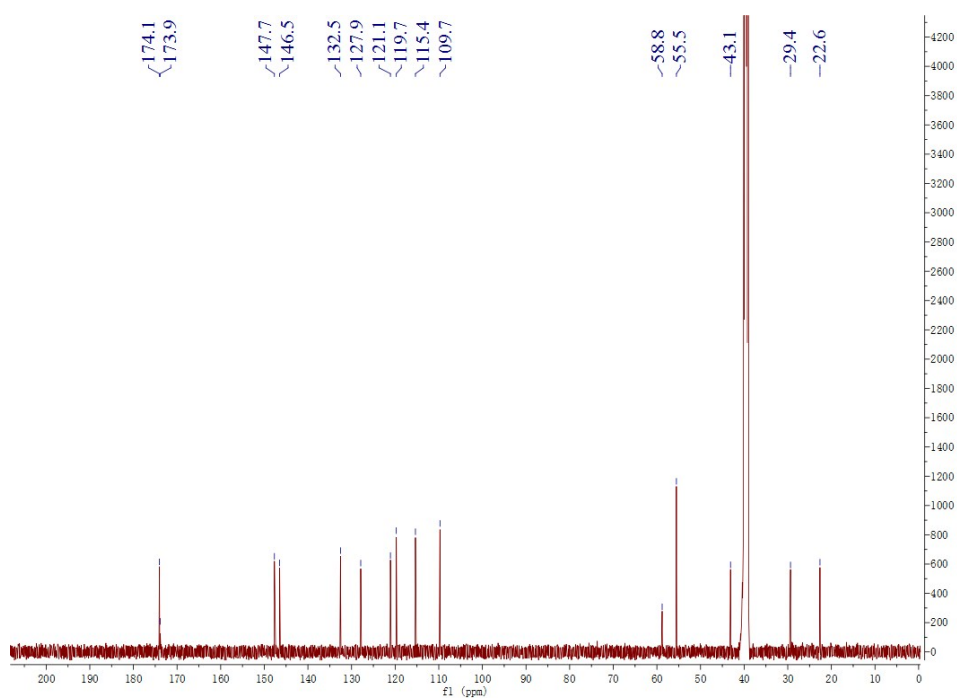

**Figure S9.** The  $^{13}\text{C}$  NMR spectrum of compound **2** in  $\text{DMSO-}d_6$



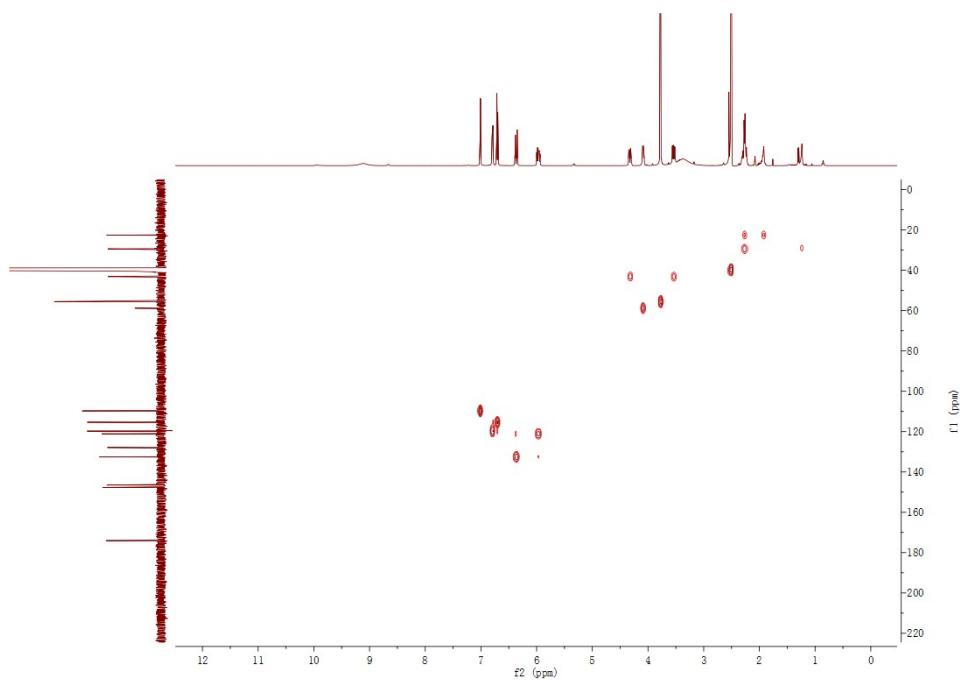

**Figure S10.** The HSQC spectrum of compound **2** in DMSO- $d_6$

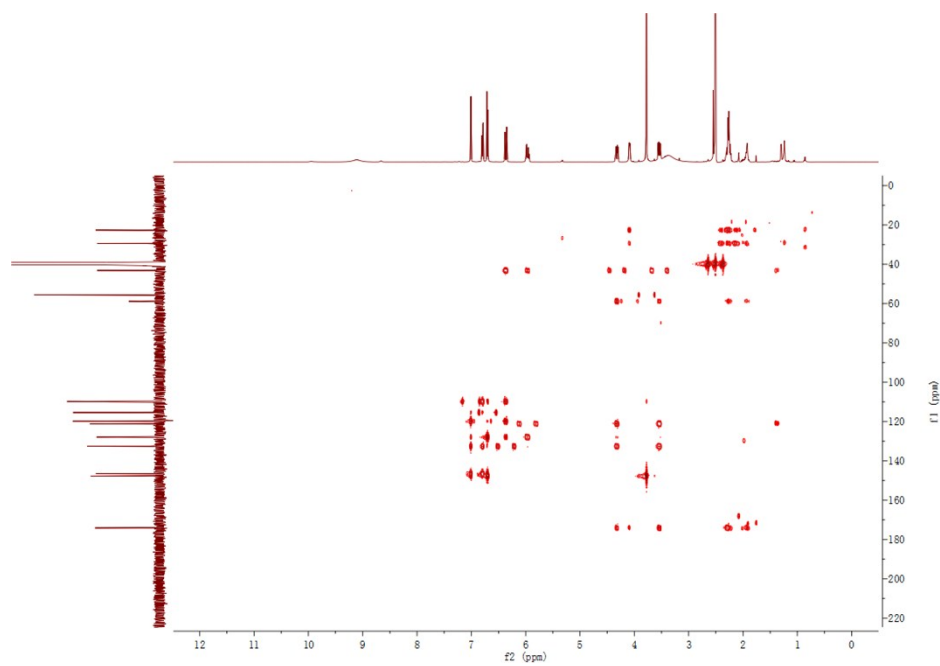

**Figure S11.** The HMBC spectrum of compound **2** in DMSO- $d_6$

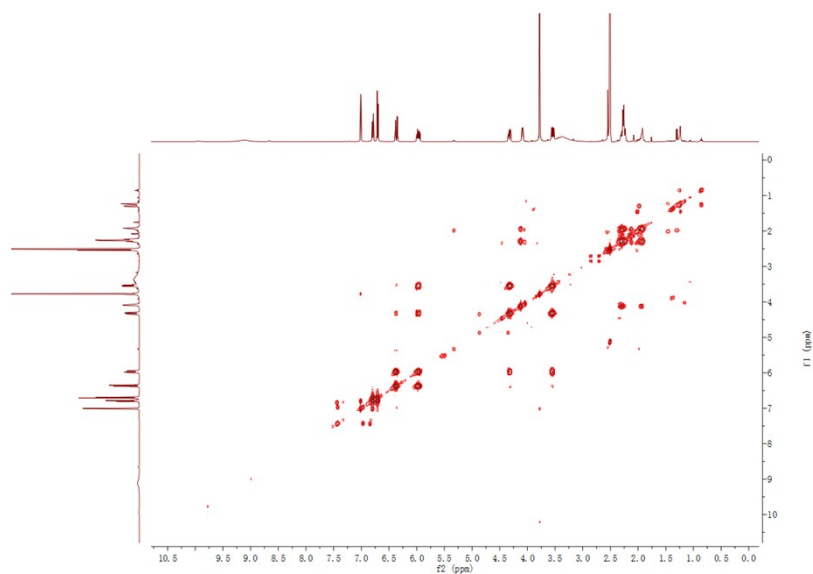

**Figure S12.** The  $^1\text{H}$ - $^1\text{H}$  COSY spectrum in  $\text{DMSO-}d_6$

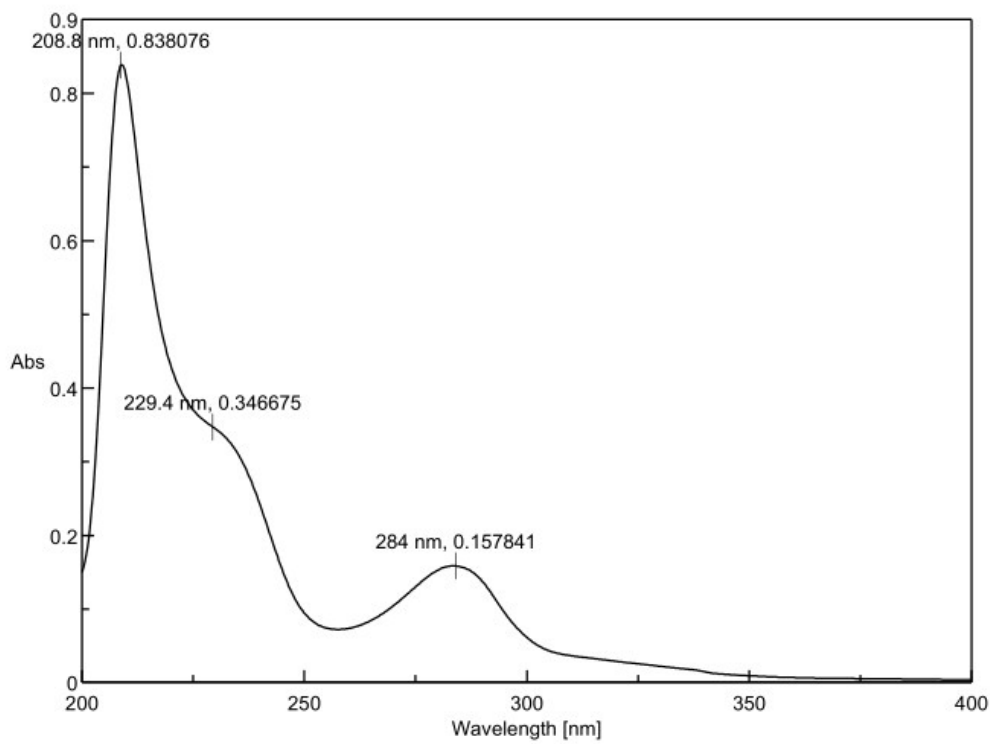

**Figure S13.** The UV spectrum of compound **2** in MeOH

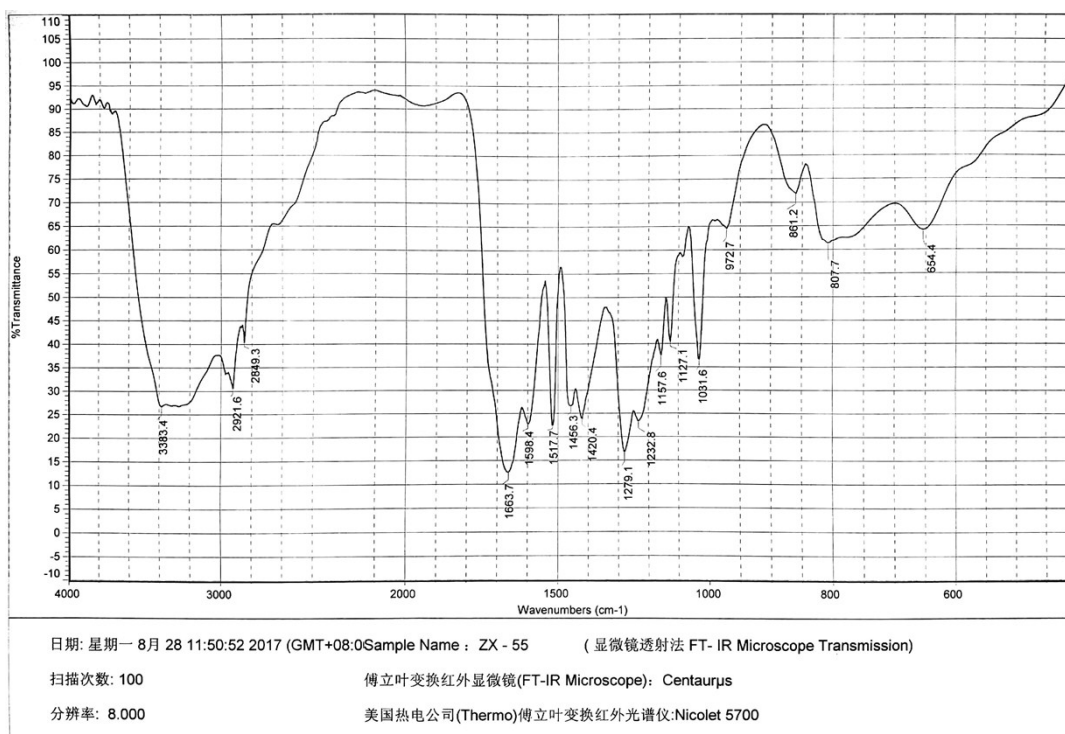

**Figure S14.** The IR spectrum of compound 2

## Qualitative Analysis Report

|                                     |                                                |
|-------------------------------------|------------------------------------------------|
| <b>Data Filename</b> 2017010403.d   | <b>Sample Name</b> ZX-55                       |
| <b>Sample Type</b> Sample           | <b>Position</b> P1-C3                          |
| <b>Instrument Name</b> Instrument 1 | <b>User Name</b>                               |
| <b>Acq Method</b>                   | <b>IRM Calibration Status</b> Some Ions Missed |
| <b>DA Method</b> TEST LCMS.m        | <b>Comment</b>                                 |

### User Chromatograms

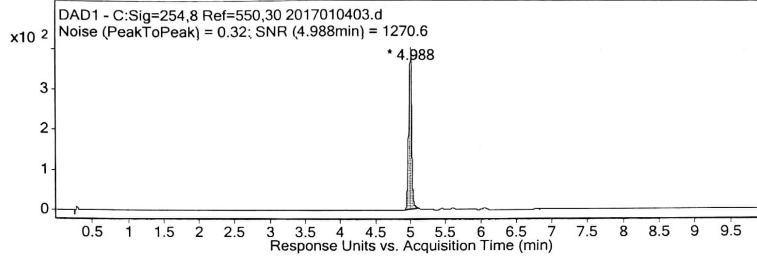

#### Integration Peak List

| Peak | Start | RT    | End   | Height | Area    | Area % | Signal To Noise |
|------|-------|-------|-------|--------|---------|--------|-----------------|
| 1    | 4.914 | 4.988 | 5.113 | 402.29 | 1275.25 | 100    | 1270.6          |

Fragmentor Voltage 150    Collision Energy 0    Ionization Mode ESI

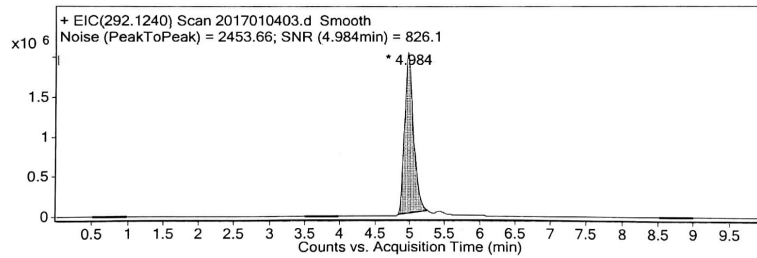

#### Integration Peak List

| Peak | Start | RT    | End   | Height  | Area     | Area % | Signal To Noise |
|------|-------|-------|-------|---------|----------|--------|-----------------|
| 1    | 4.839 | 4.984 | 5.258 | 2026928 | 18232247 | 100    | 826.1           |

### User Spectra

Fragmentor Voltage 150    Collision Energy 0    Ionization Mode ESI

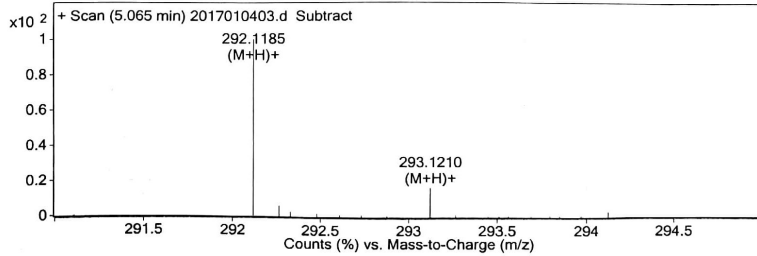

**Figure S15.** The HR-ESI-MS data of compound 2

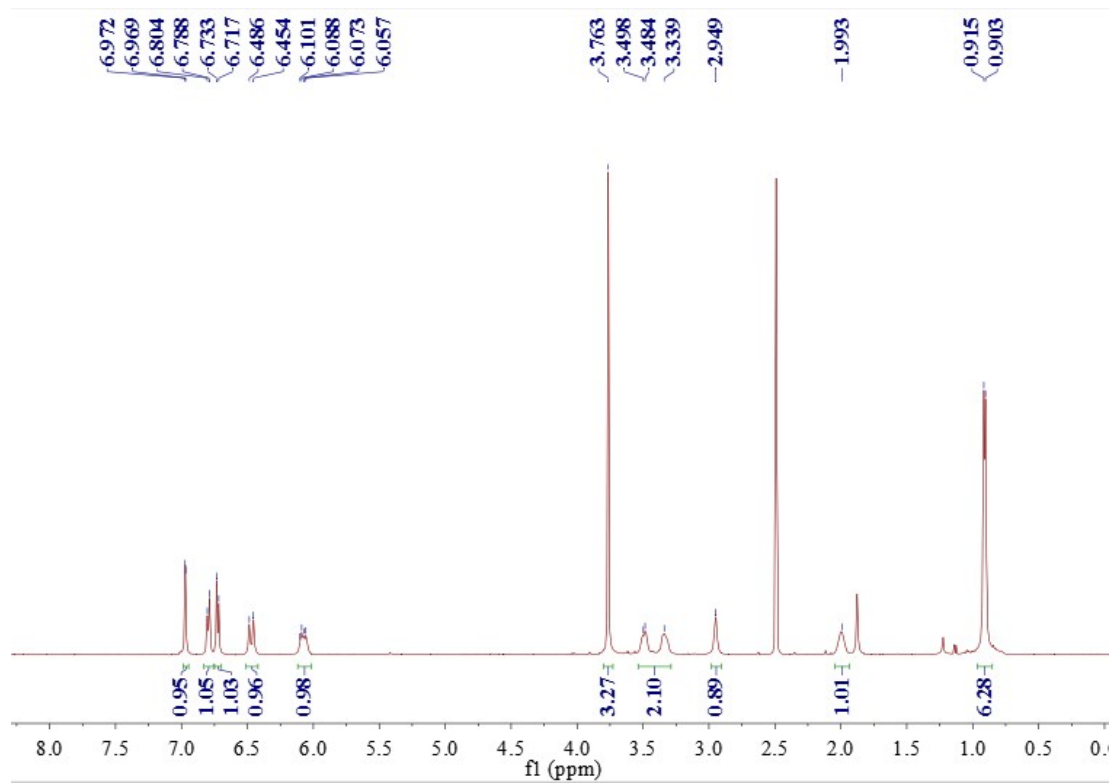

Figure S16. The  $^1\text{H}$  NMR spectrum of compound **3** in  $\text{DMSO-}d_6$

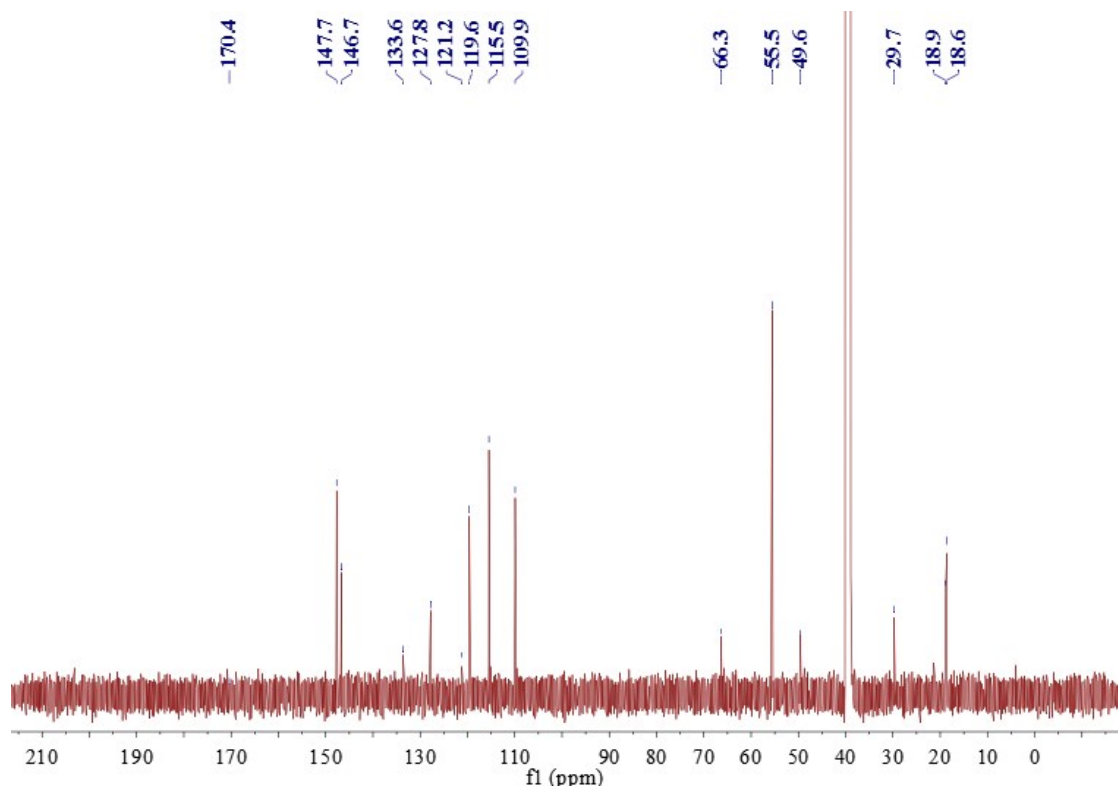

Figure S17. The  $^{13}\text{C}$  NMR spectrum of compound **3** in  $\text{DMSO-}d_6$

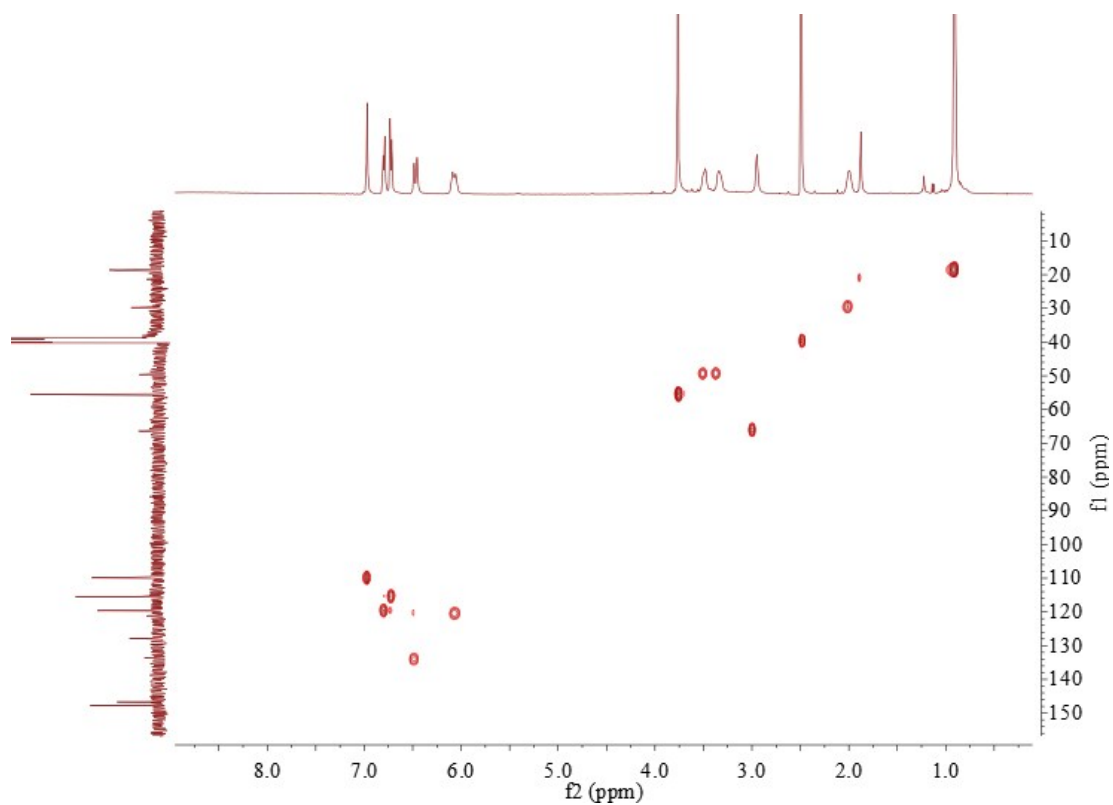

**Figure S18.** The HSQC spectrum of compound **3** in DMSO- $d_6$

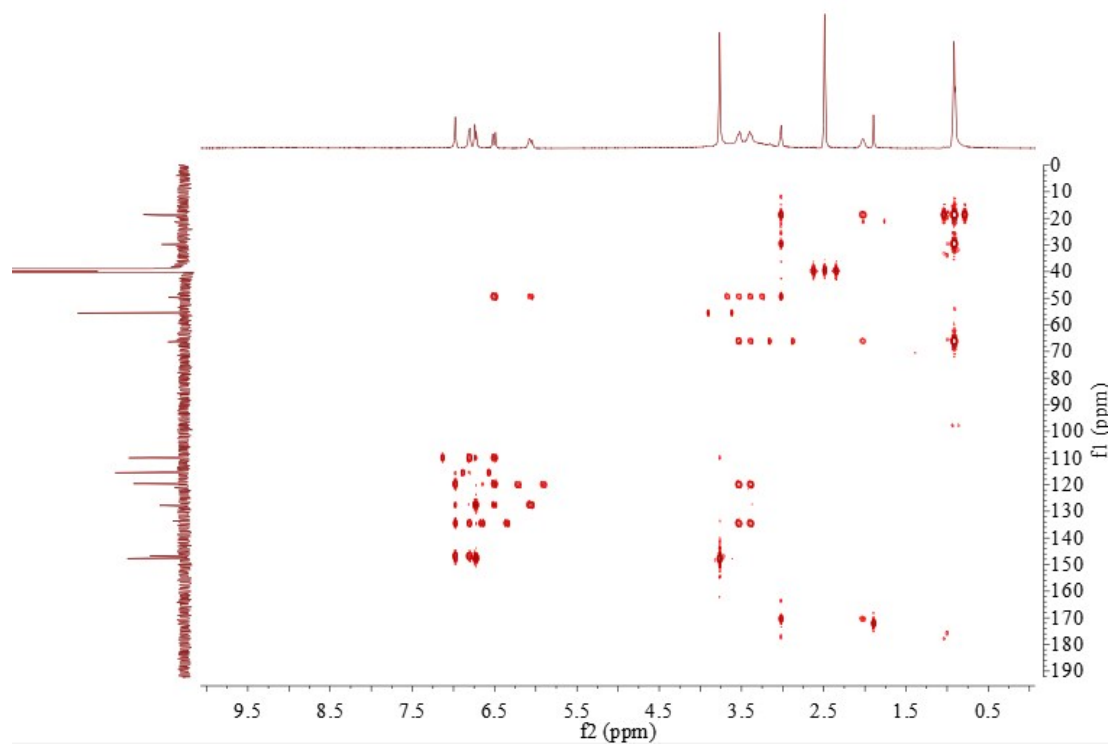

**Figure S19.** The HMBC spectrum of compound **3** in DMSO- $d_6$

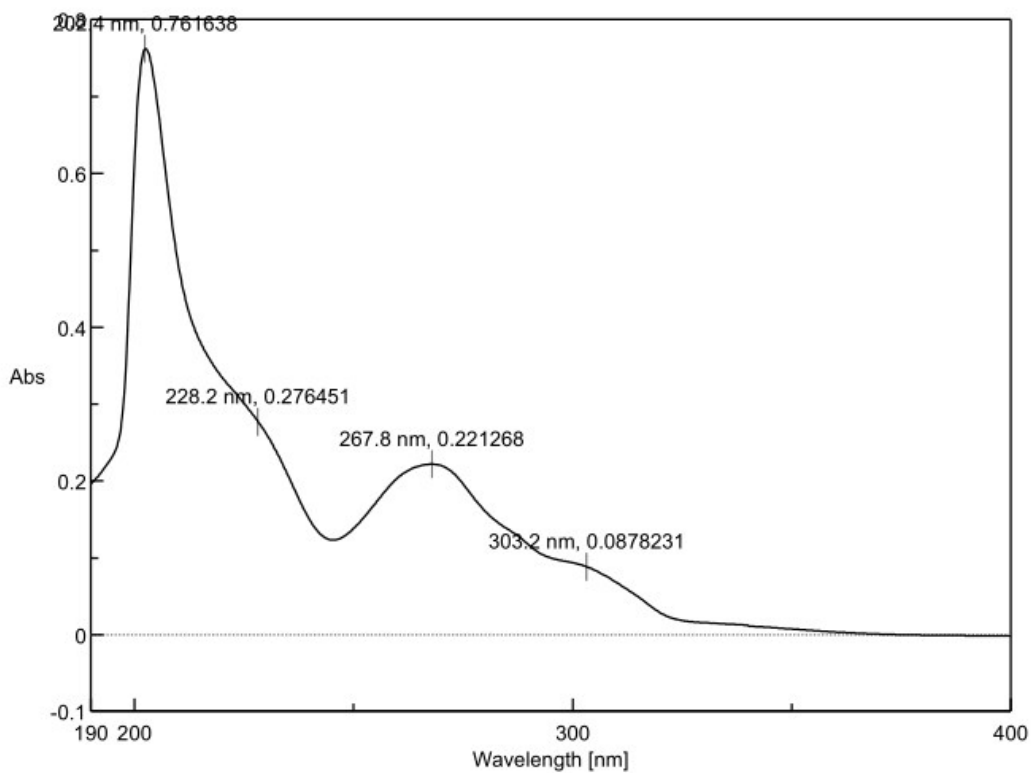

Figure S20. The UV spectrum of compound 3 in MeOH

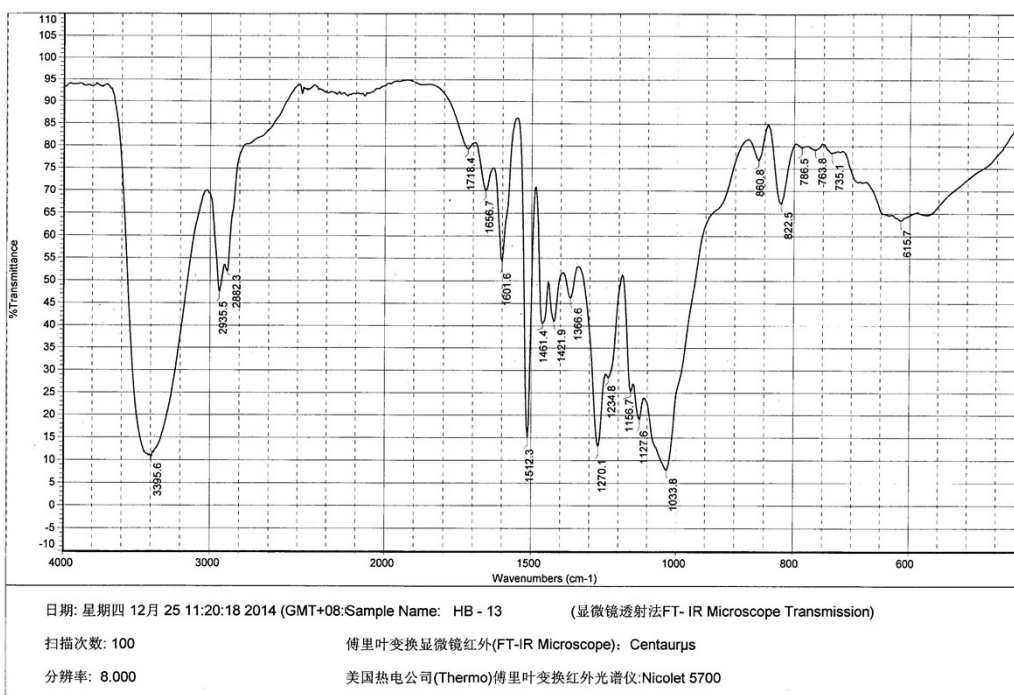

Figure S21. The IR spectrum of compound 3

## Qualitative Analysis Report

|                        |              |                               |            |
|------------------------|--------------|-------------------------------|------------|
| <b>Data Filename</b>   | 2014102313.d | <b>Sample Name</b>            | HB-13      |
| <b>Sample Type</b>     | Sample       | <b>Position</b>               | P1-C1      |
| <b>Instrument Name</b> | Instrument 1 | <b>User Name</b>              |            |
| <b>Acq Method</b>      | TEST LCMS.m  | <b>IRM Calibration Status</b> | ██████████ |
| <b>DA Method</b>       | TEST LCMS.m  | <b>Comment</b>                |            |

### User Chromatograms

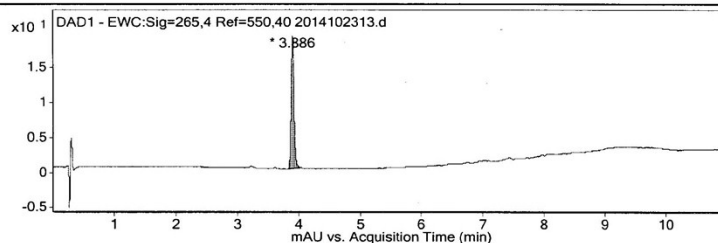

#### Integration Peak List

| Peak | Start | RT    | End   | Height | Area   | Area % |
|------|-------|-------|-------|--------|--------|--------|
| 1    | 3.809 | 3.886 | 4.021 | 18.89  | 64.801 | 100    |

Fragmentor Voltage 135    Collision Energy 0    Ionization Mode ESI

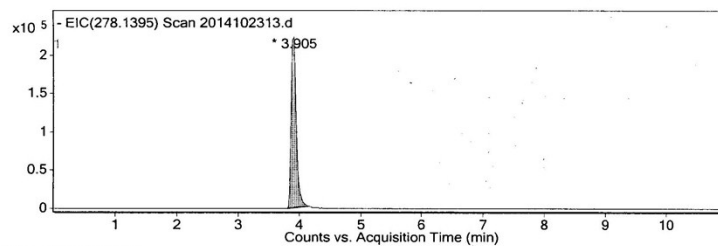

#### Integration Peak List

| Peak | Start | RT    | End   | Height | Area    | Area % |
|------|-------|-------|-------|--------|---------|--------|
| 1    | 3.792 | 3.905 | 4.147 | 223433 | 1179188 | 100    |

### User Spectra

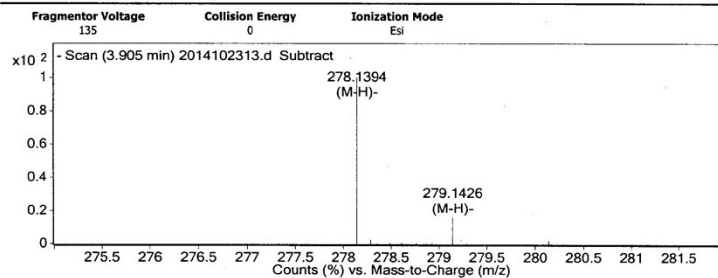

**Figure S22.** The HR-ESI-MS data of compound **3**



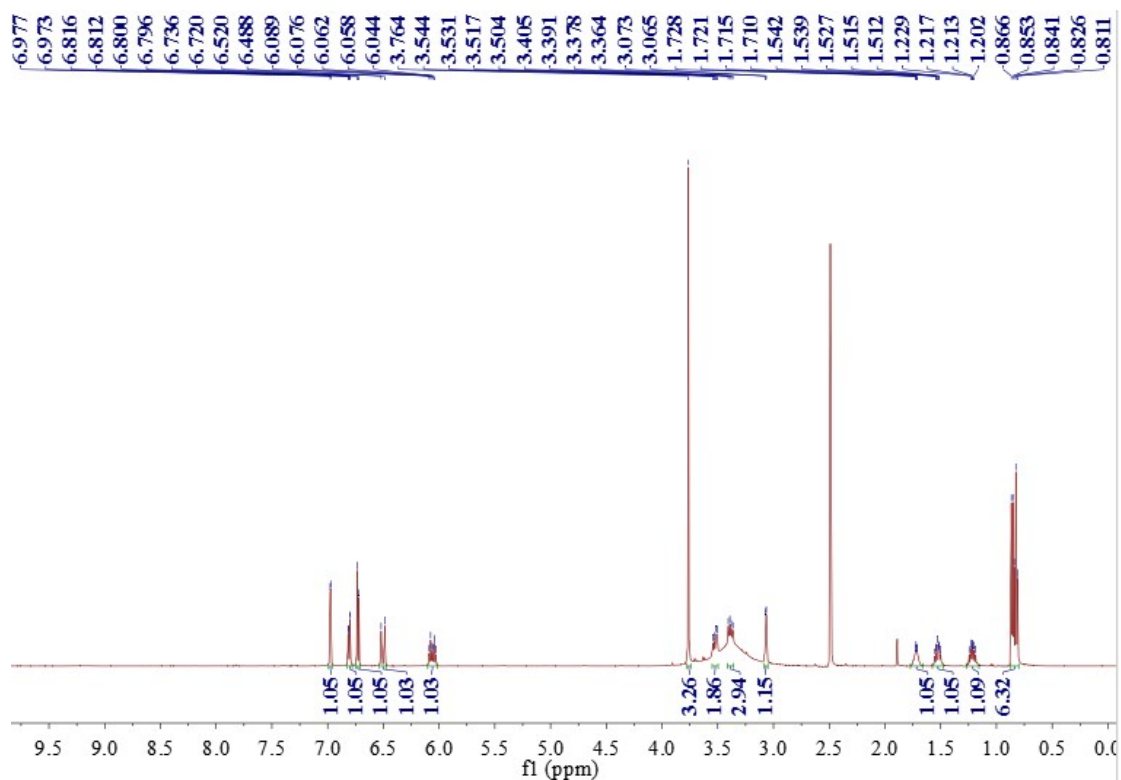

Figure S23. The  $^1\text{H}$  NMR spectrum of compound **4** in  $\text{DMSO-}d_6$

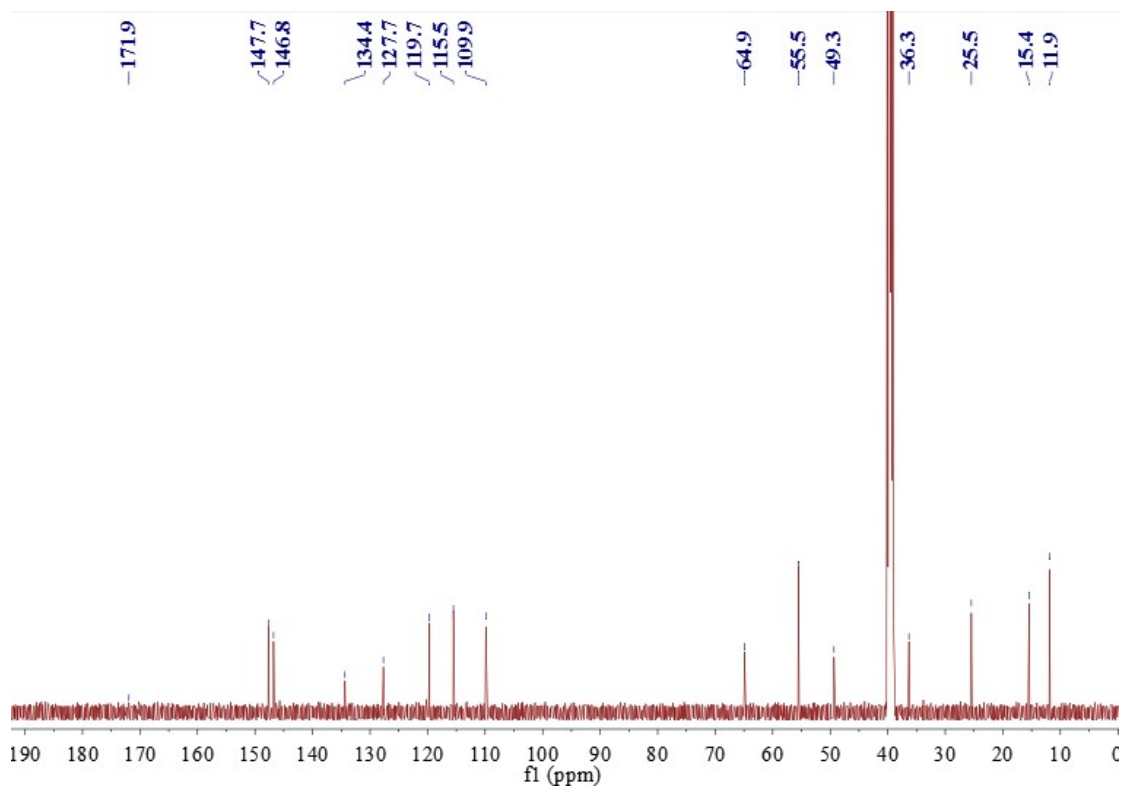

Figure S24. The  $^{13}\text{C}$  NMR spectrum of compound **4** in  $\text{DMSO-}d_6$

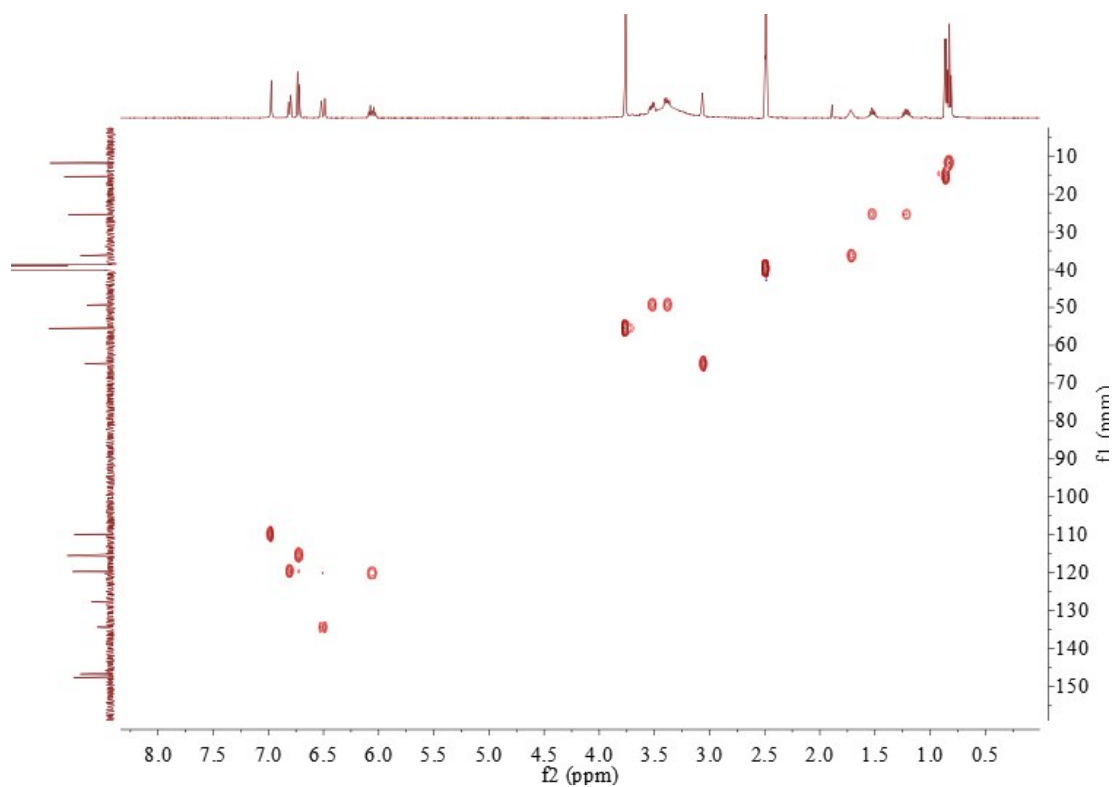

**Figure S25.** The HSQC spectrum of compound **4** in DMSO- $d_6$

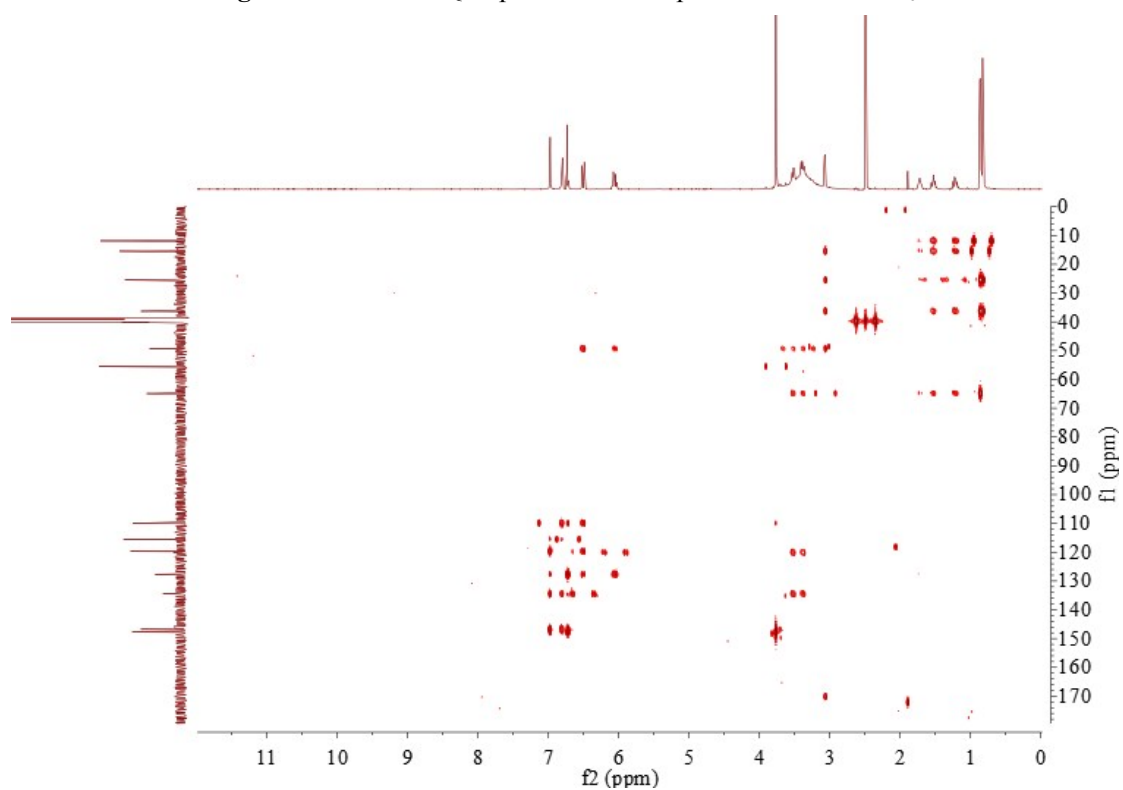

**Figure S26.** The HMBC spectrum of compound **4** in DMSO- $d_6$

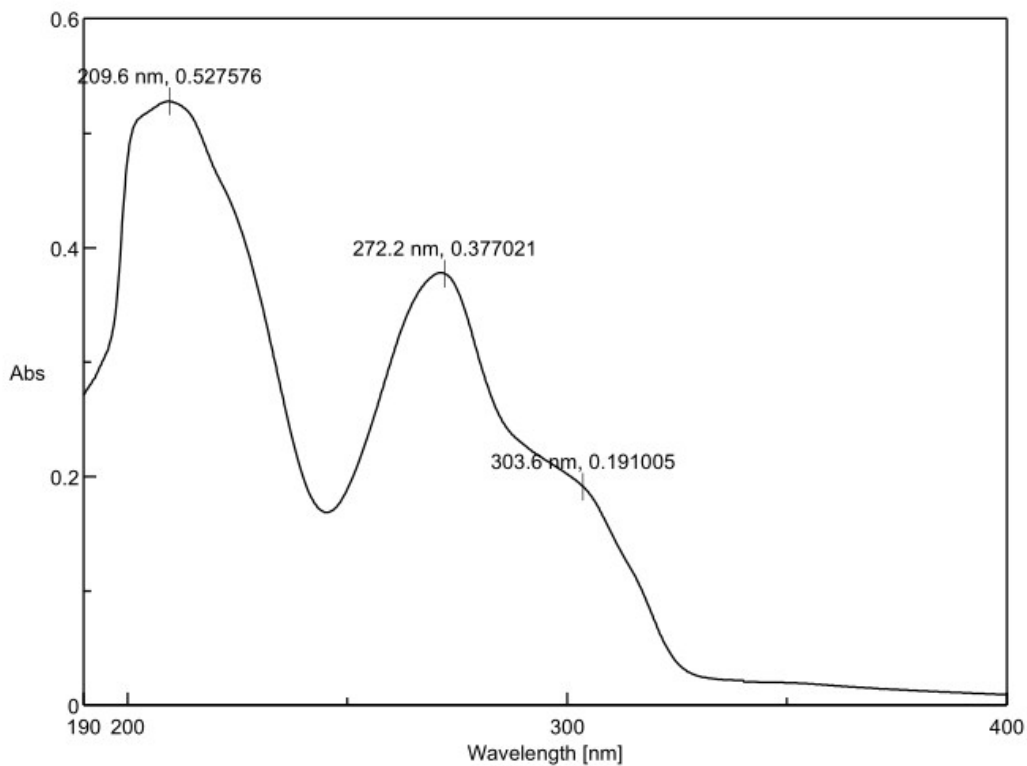

Figure S27. The UV spectrum of compound 4 in MeOH

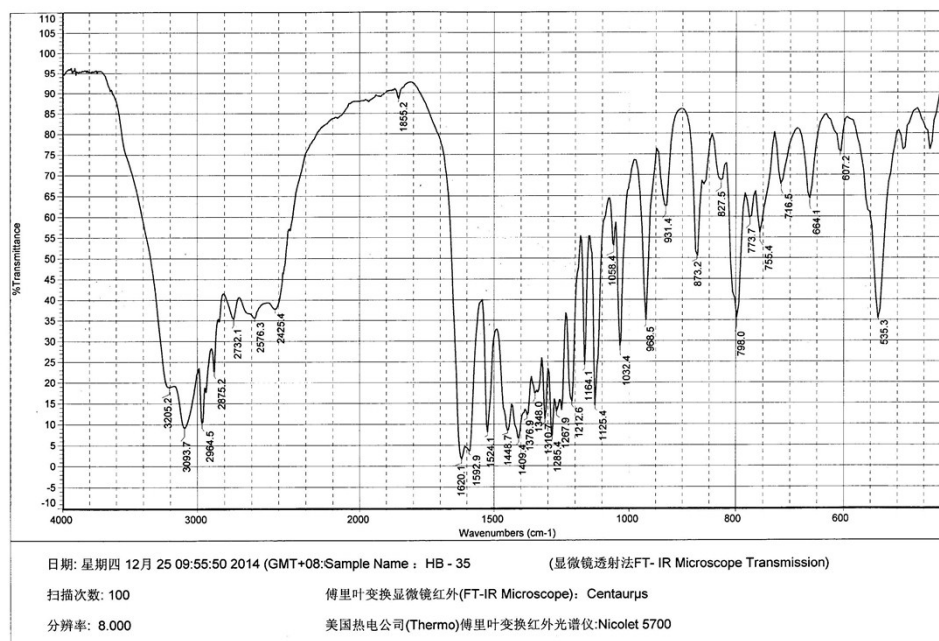

Figure S28. The IR spectrum of compound 4

## Qualitative Analysis Report

|                        |              |                               |            |
|------------------------|--------------|-------------------------------|------------|
| <b>Data Filename</b>   | 2014102412.d | <b>Sample Name</b>            | HB-35      |
| <b>Sample Type</b>     | Sample       | <b>Position</b>               | P1-C1      |
| <b>Instrument Name</b> | Instrument 1 | <b>User Name</b>              |            |
| <b>Acq Method</b>      | TEST LCMS.m  | <b>IRM Calibration Status</b> | XXXXXXXXXX |
| <b>DA Method</b>       | TEST LCMS.m  | <b>Comment</b>                |            |

### User Chromatograms

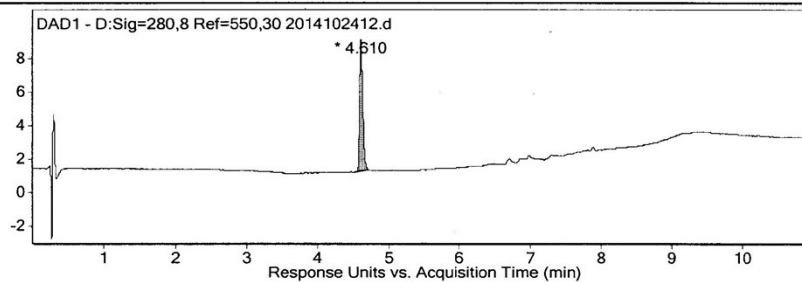

#### Integration Peak List

| Peak | Start | RT   | End   | Height | Area  | Area % |
|------|-------|------|-------|--------|-------|--------|
| 1    | 4.513 | 4.61 | 4.715 | 7.85   | 25.84 | 100    |

Fragmentor Voltage: 135    Collision Energy: 0    Ionization Mode: ESI

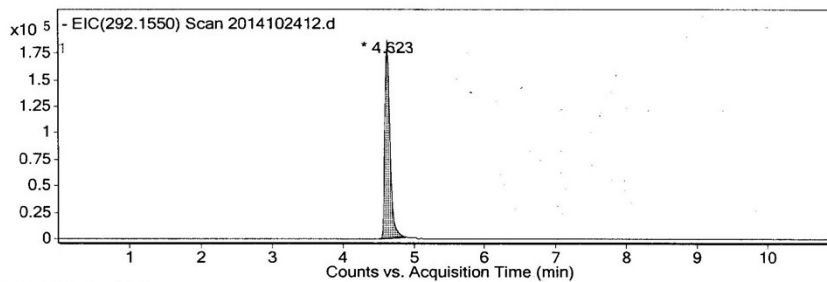

#### Integration Peak List

| Peak | Start | RT    | End   | Height | Area   | Area % |
|------|-------|-------|-------|--------|--------|--------|
| 1    | 4.495 | 4.623 | 4.881 | 187387 | 969022 | 100    |

### User Spectra

Fragmentor Voltage: 135    Collision Energy: 0    Ionization Mode: ESI

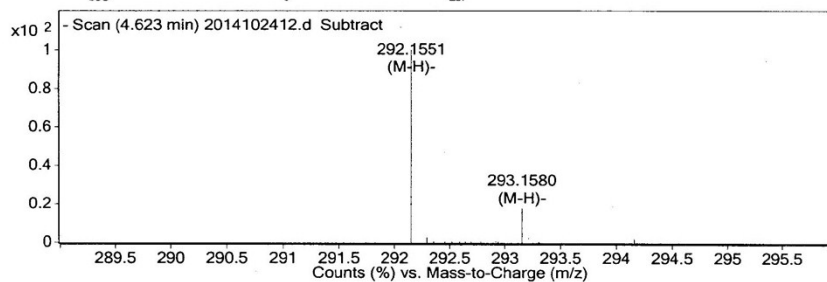

**Figure S29.** The HR-ESI-MS data of compound 4

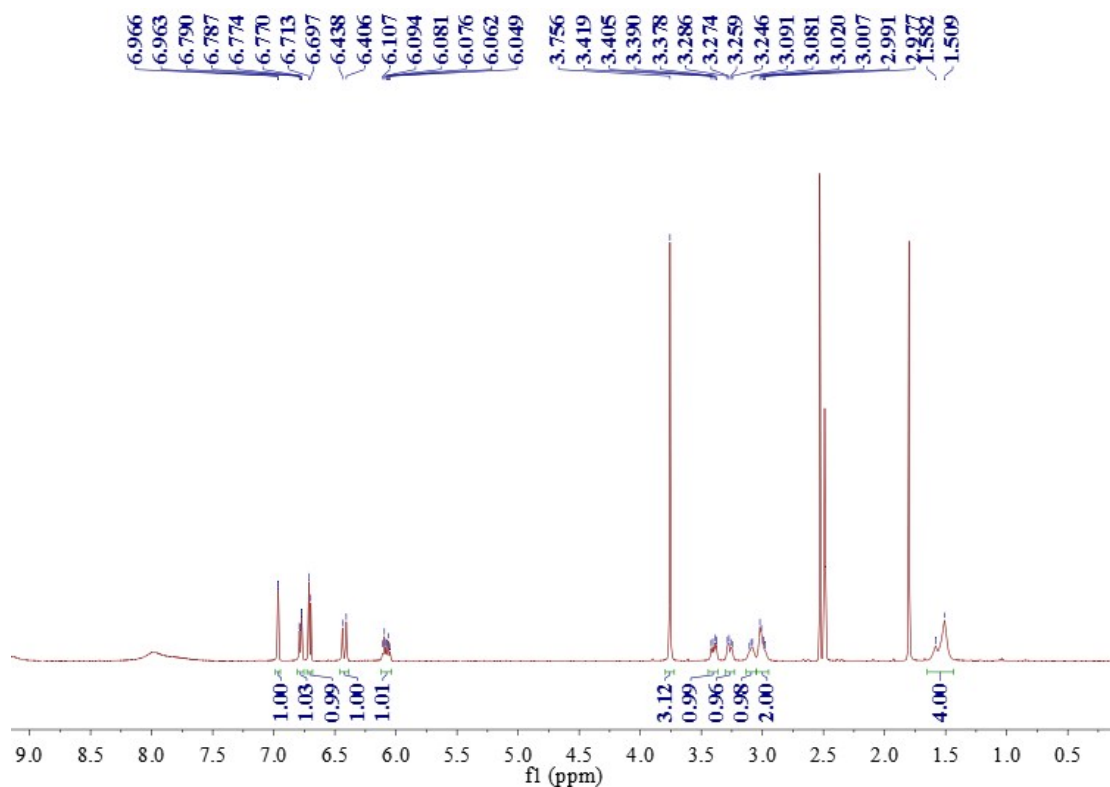

Figure S30. The  $^1\text{H}$  NMR spectrum of compound **5** in  $\text{DMSO-}d_6$

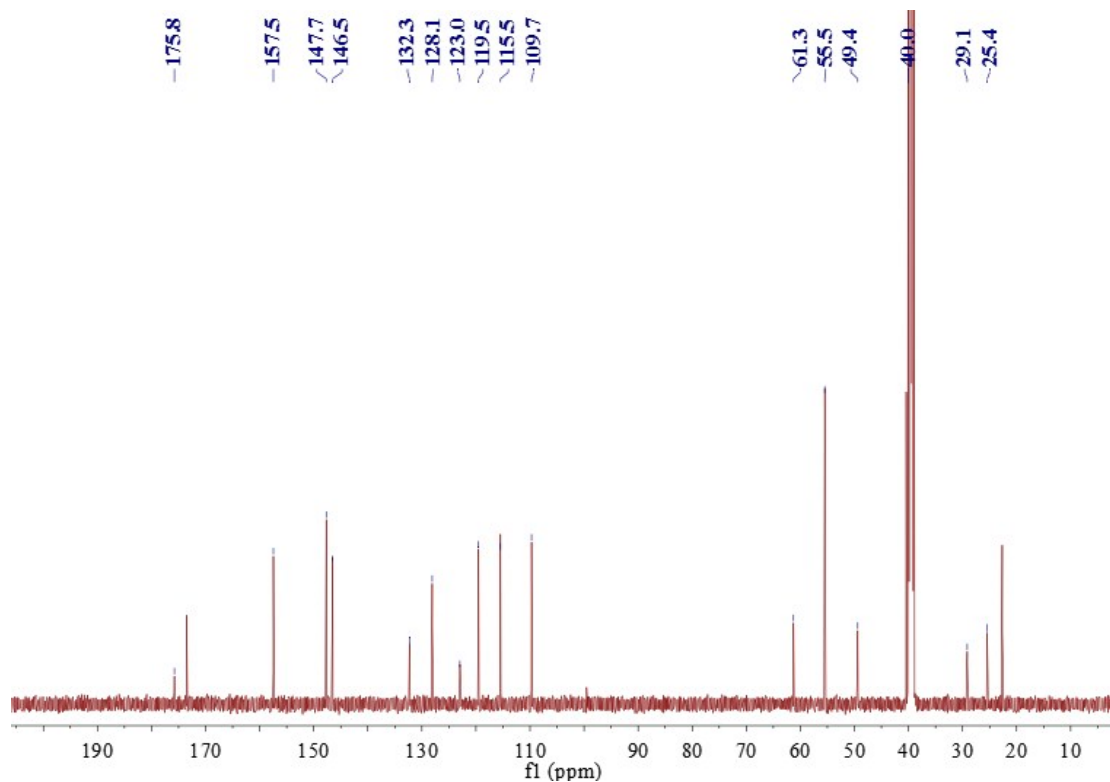

Figure S31. The  $^{13}\text{C}$  NMR spectrum of compound **5** in  $\text{DMSO-}d_6$

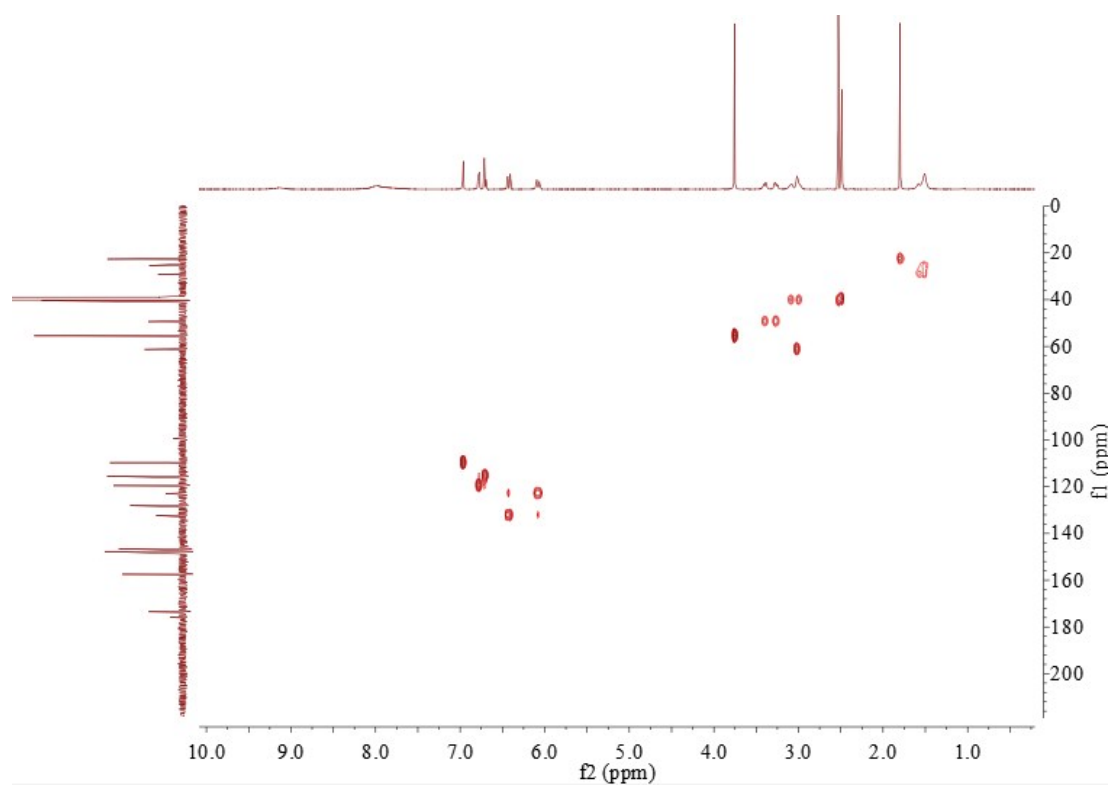

**Figure S32.** The HSQC spectrum of compound **5** in DMSO- $d_6$

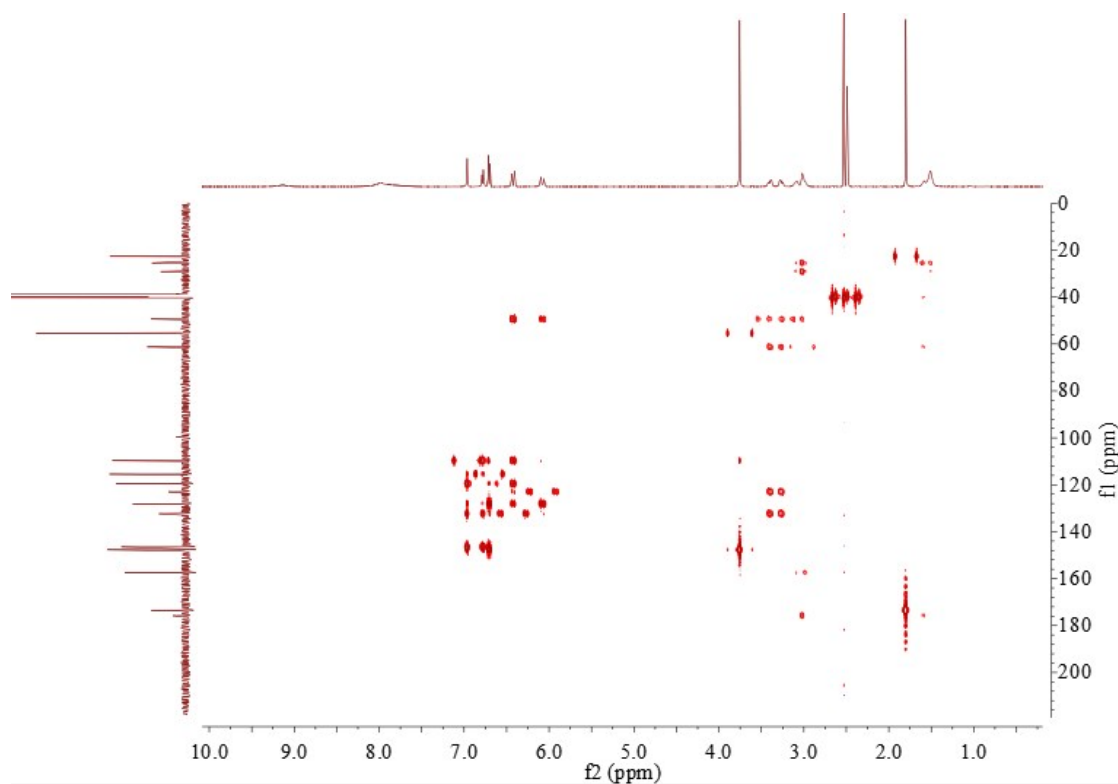

**Figure S33.** The HMBC spectrum of compound **5** in DMSO- $d_6$

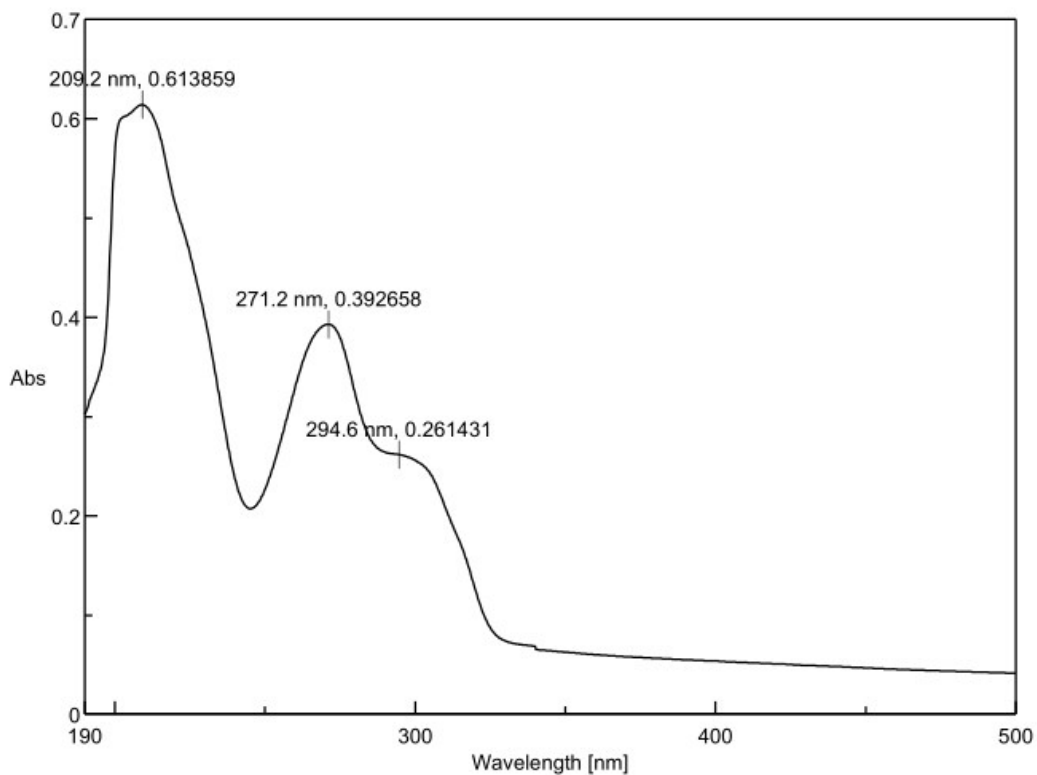

Figure S34. The UV spectrum of compound 5 in MeOH

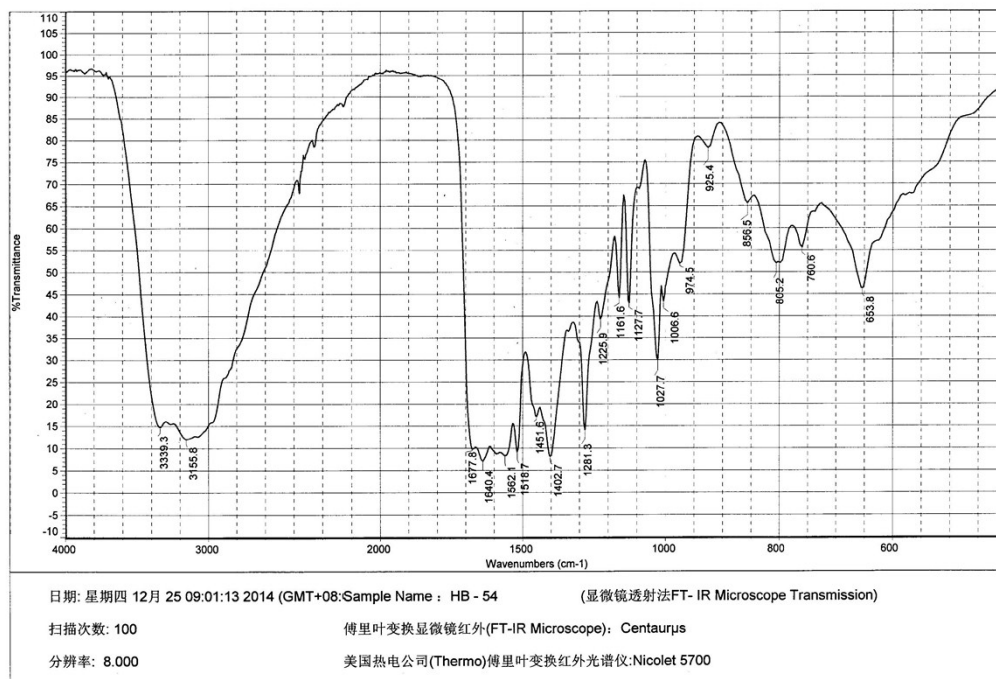

Figure S35. The IR spectrum of compound 5

## Qualitative Analysis Report

|                                     |                                                                                                      |
|-------------------------------------|------------------------------------------------------------------------------------------------------|
| <b>Data Filename</b> 2014112003.d   | <b>Sample Name</b> HB-54                                                                             |
| <b>Sample Type</b> Sample           | <b>Position</b> P1-C3                                                                                |
| <b>Instrument Name</b> Instrument 1 | <b>User Name</b>                                                                                     |
| <b>Acq Method</b> TEST LCMS.m       | <b>IRM Calibration Status</b> <span style="background-color: black; color: black;">XXXXXXXXXX</span> |
| <b>DA Method</b> TEST LCMS.m        | <b>Comment</b>                                                                                       |

### User Chromatograms

Fragmentor Voltage 135    Collision Energy 0    Ionization Mode ESI

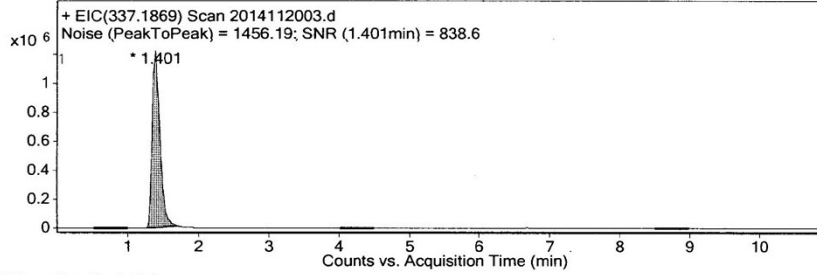

#### Integration Peak List

| Peak | Start | RT    | End   | Height  | Area    | Area % | Signal To Noise |
|------|-------|-------|-------|---------|---------|--------|-----------------|
| 1    | 1.272 | 1.401 | 1.723 | 1221116 | 9277301 | 100    | 838.6           |

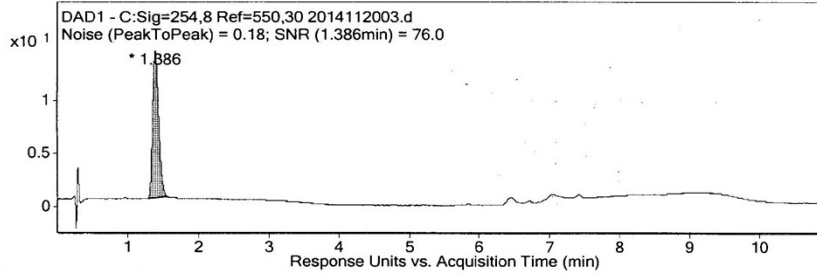

#### Integration Peak List

| Peak | Start | RT    | End   | Height | Area  | Area % | Signal To Noise |
|------|-------|-------|-------|--------|-------|--------|-----------------|
| 1    | 1.284 | 1.386 | 1.568 | 13.84  | 82.63 | 100    | 76              |

### User Spectra

Fragmentor Voltage 135    Collision Energy 0    Ionization Mode ESI

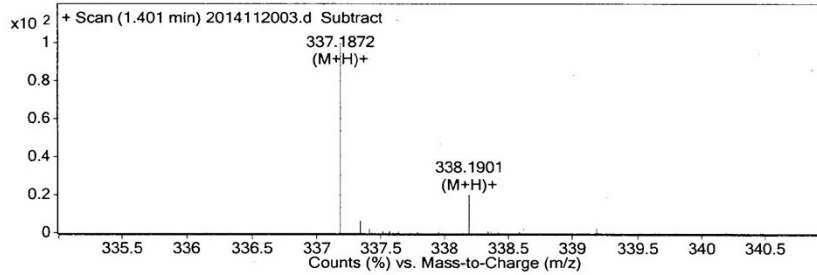

**Figure S36.** The HR-ESI-MS data of compound 5



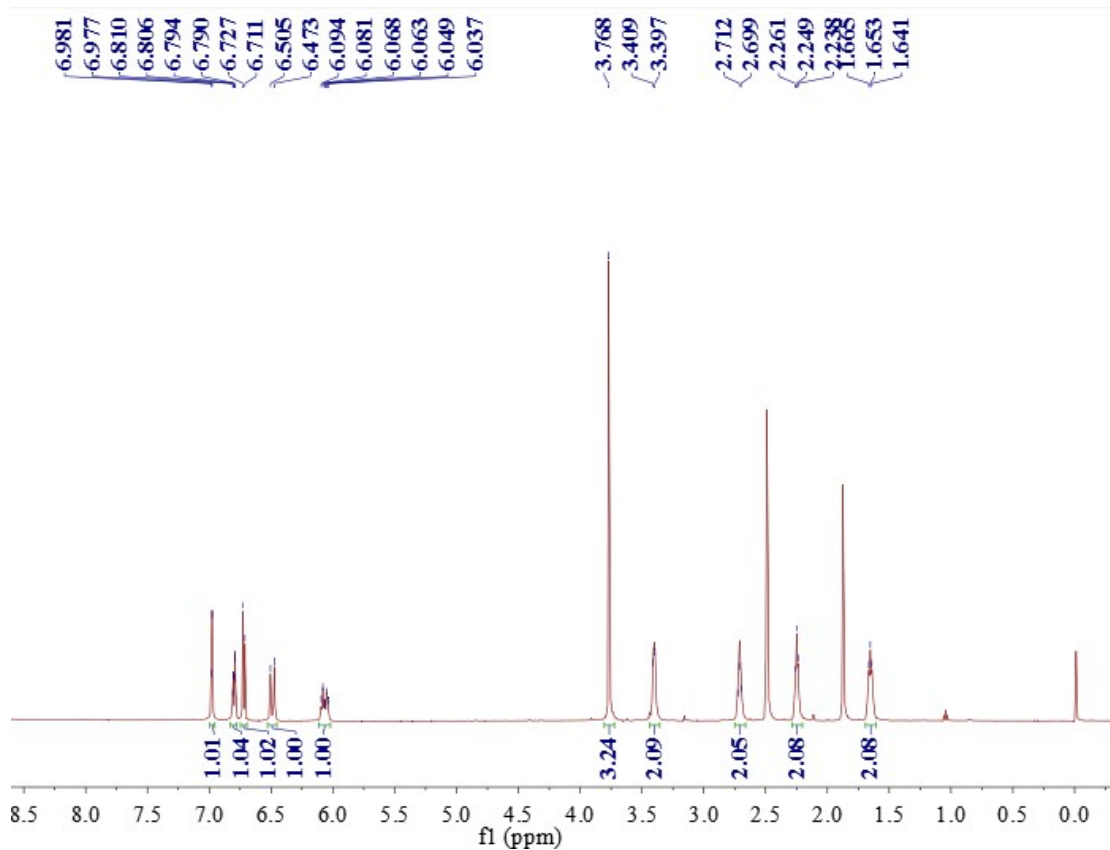

Figure S37. The  $^1\text{H}$  NMR spectrum of compound **6** in  $\text{DMSO-}d_6$

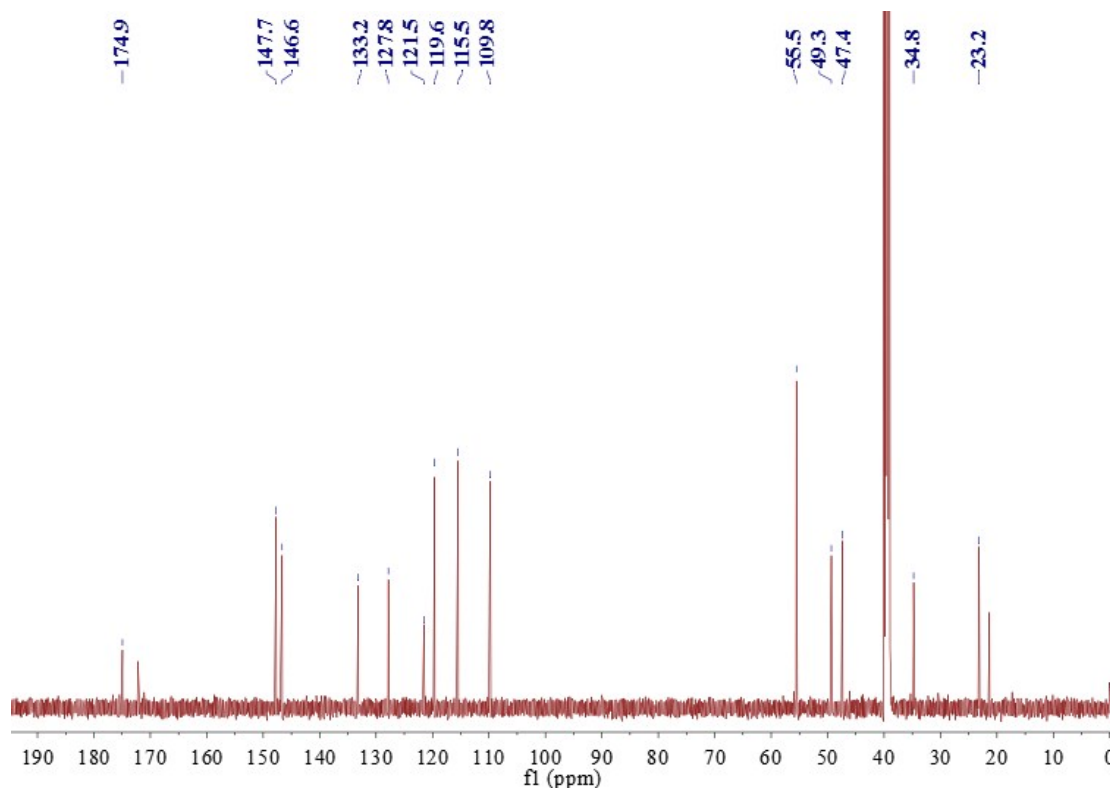

Figure S38. The  $^{13}\text{C}$  NMR spectrum of compound **6** in  $\text{DMSO-}d_6$

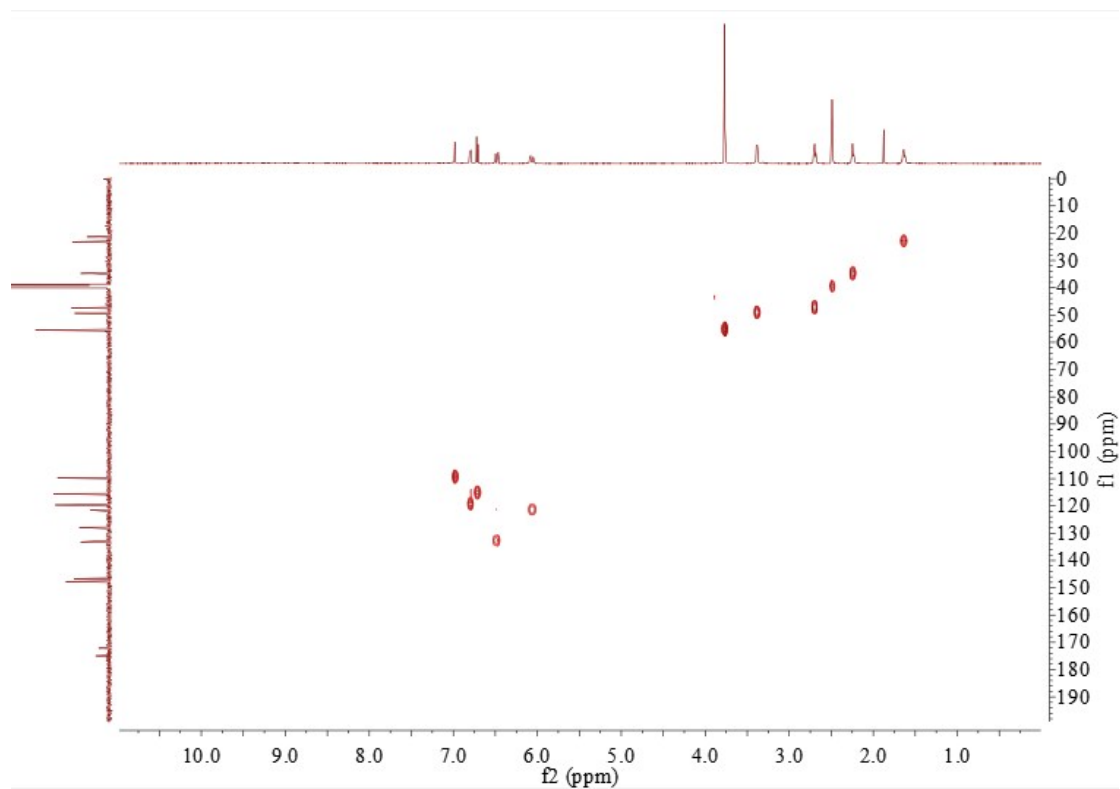

**Figure S39.** The HSQC spectrum of compound **6** in DMSO- $d_6$

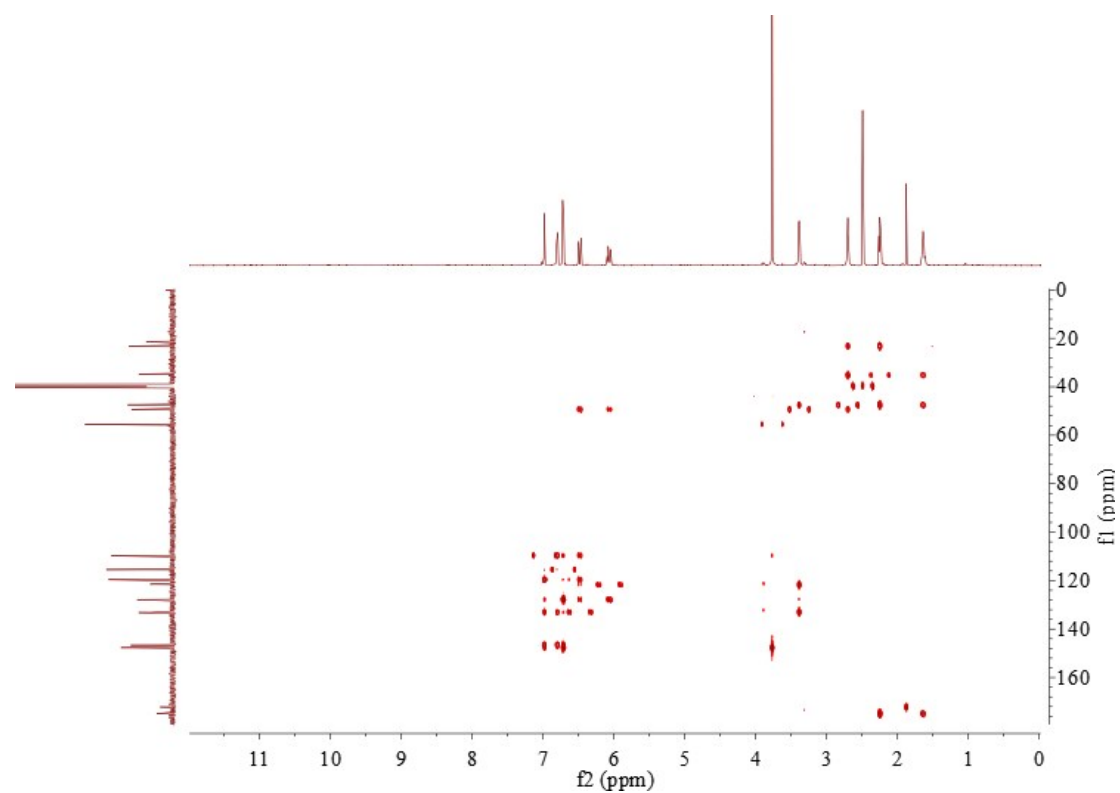

**Figure S40.** The HMBC spectrum of compound **6** in DMSO- $d_6$

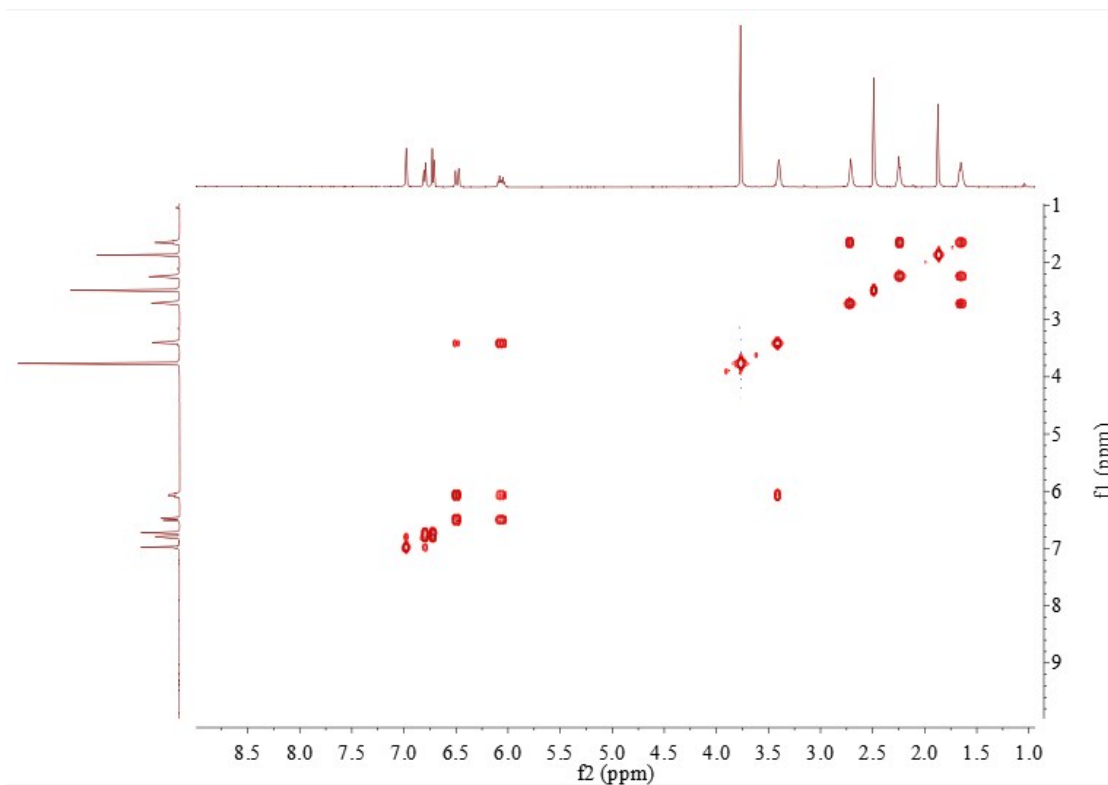

**Figure S41.** The  $^1\text{H}$ - $^1\text{H}$  COSY spectrum of compound **6** in  $\text{DMSO-}d_6$

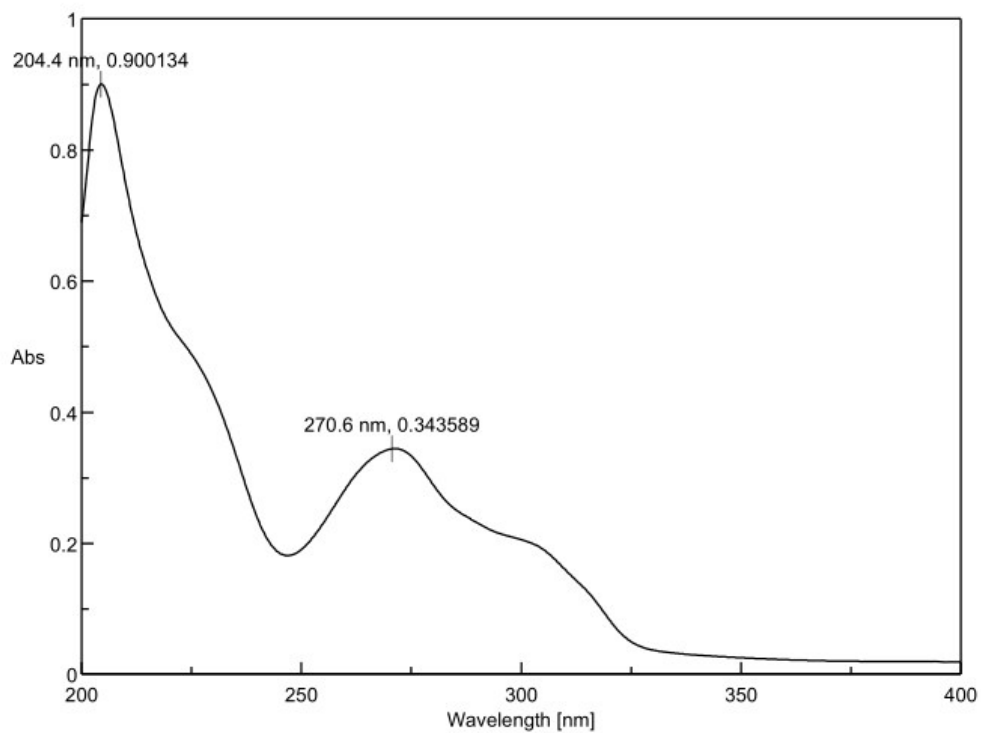

**Figure S42.** The UV spectrum of compound **6** in MeOH

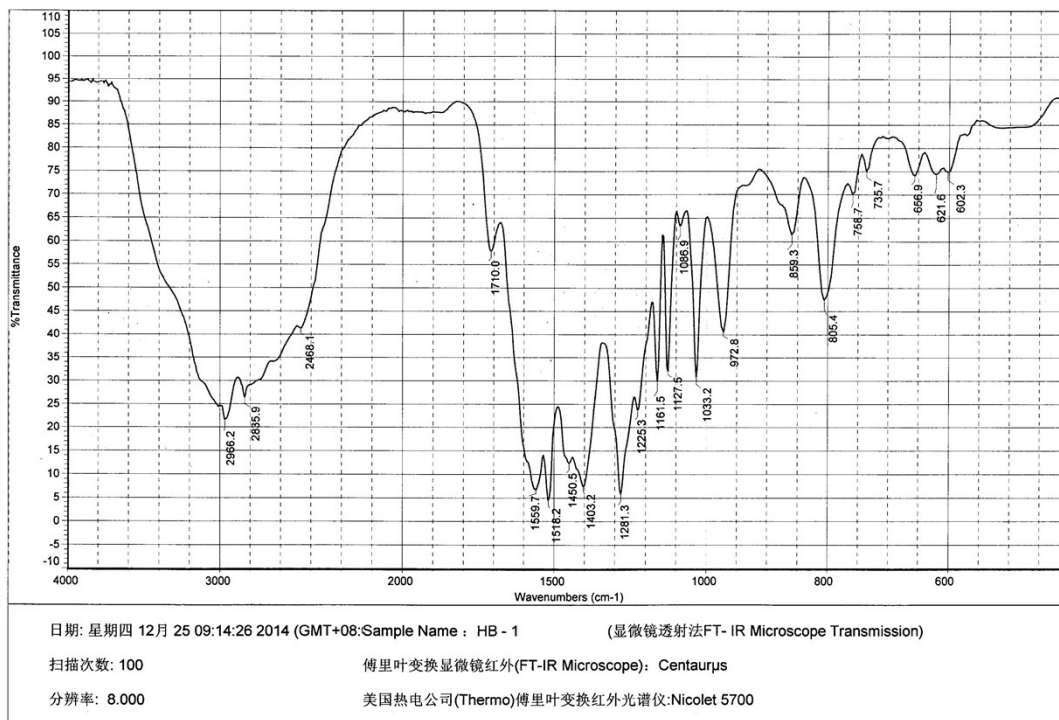

Figure S43. The IR spectrum of compound 6

## Qualitative Analysis Report

|                        |              |                               |            |
|------------------------|--------------|-------------------------------|------------|
| <b>Data Filename</b>   | 2014102310.d | <b>Sample Name</b>            | HB-1       |
| <b>Sample Type</b>     | Sample       | <b>Position</b>               | P1-D1      |
| <b>Instrument Name</b> | Instrument 1 | <b>User Name</b>              |            |
| <b>Acq Method</b>      | TEST LCMS.m  | <b>IRM Calibration Status</b> | XXXXXXXXXX |
| <b>DA Method</b>       | TEST LCMS.m  | <b>Comment</b>                |            |

### User Chromatograms

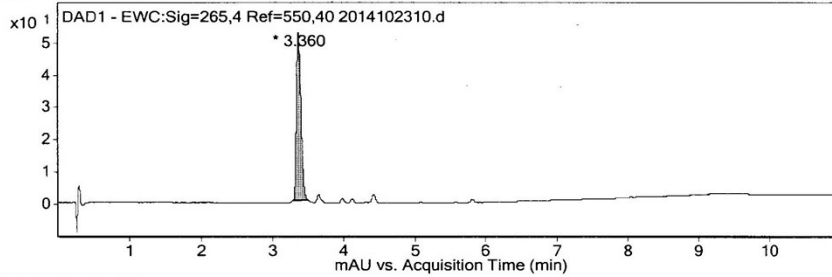

#### Integration Peak List

| Peak | Start | RT   | End   | Height | Area    | Area % |
|------|-------|------|-------|--------|---------|--------|
| 1    | 3.279 | 3.36 | 3.491 | 52.18  | 226.169 | 100    |

Fragmentor Voltage: 135    Collision Energy: 0    Ionization Mode: ESI

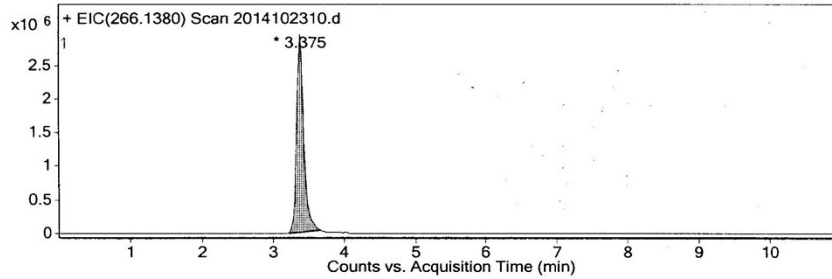

#### Integration Peak List

| Peak | Start | RT    | End   | Height  | Area     | Area % |
|------|-------|-------|-------|---------|----------|--------|
| 1    | 3.214 | 3.375 | 3.665 | 2939277 | 19639135 | 100    |

### User Spectra

Fragmentor Voltage: 135    Collision Energy: 0    Ionization Mode: ESI

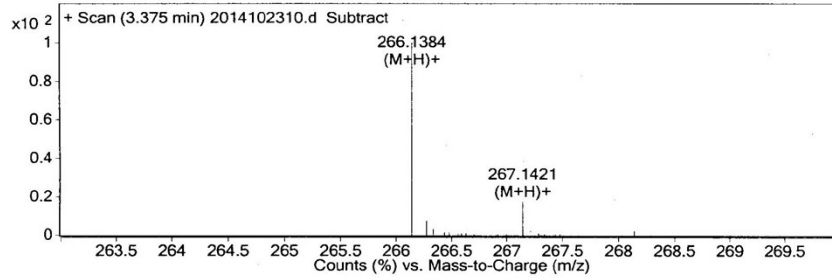

**Figure S44.** The HR-ESI-MS data of compound 6

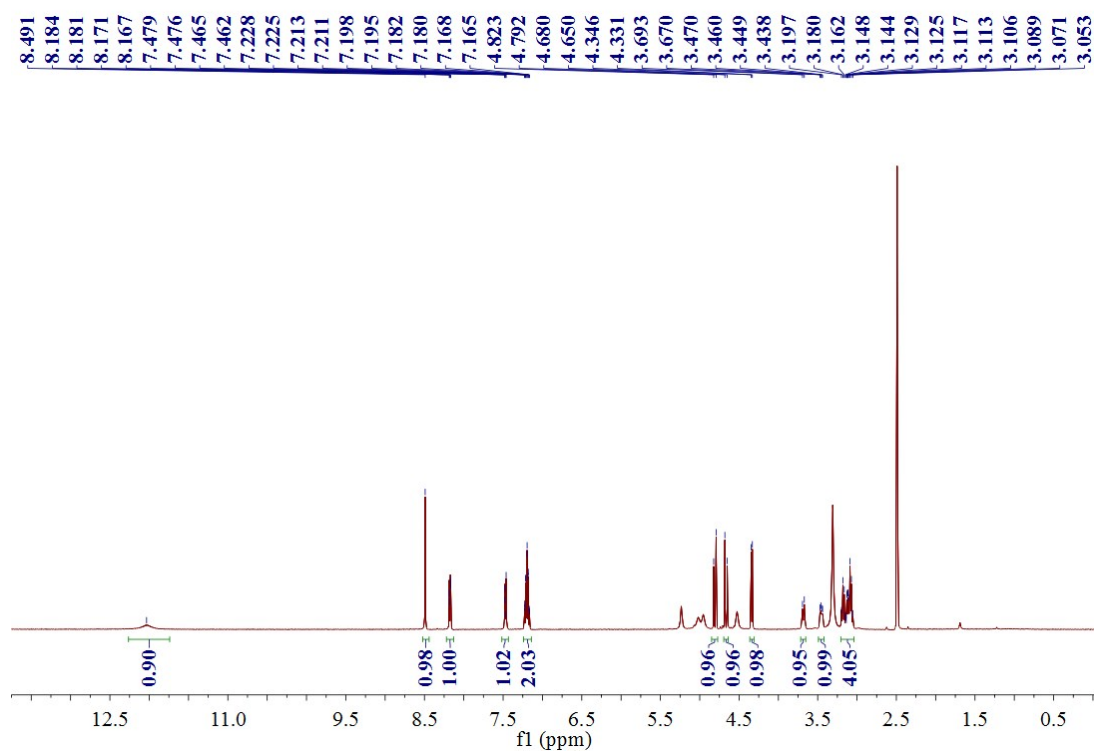

Figure S45. The  $^1\text{H}$  NMR spectrum of compound **7** in  $\text{DMSO-}d_6$

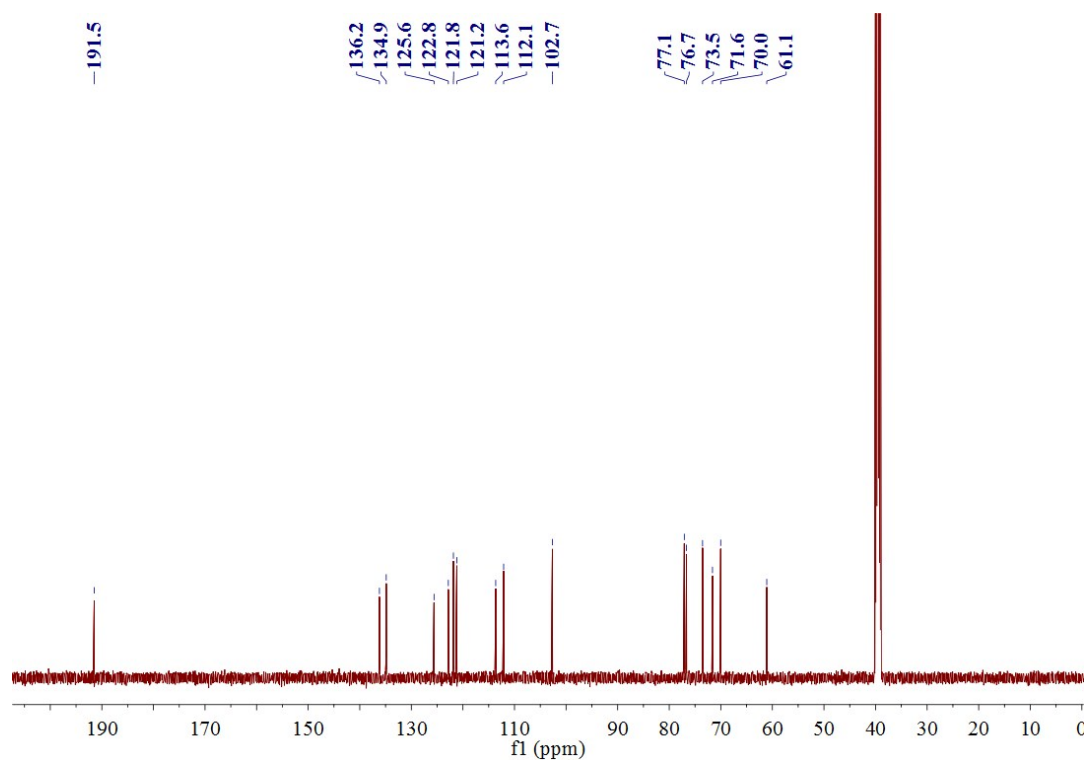

Figure S46. The  $^{13}\text{C}$  NMR spectrum of compound **7** in  $\text{DMSO-}d_6$

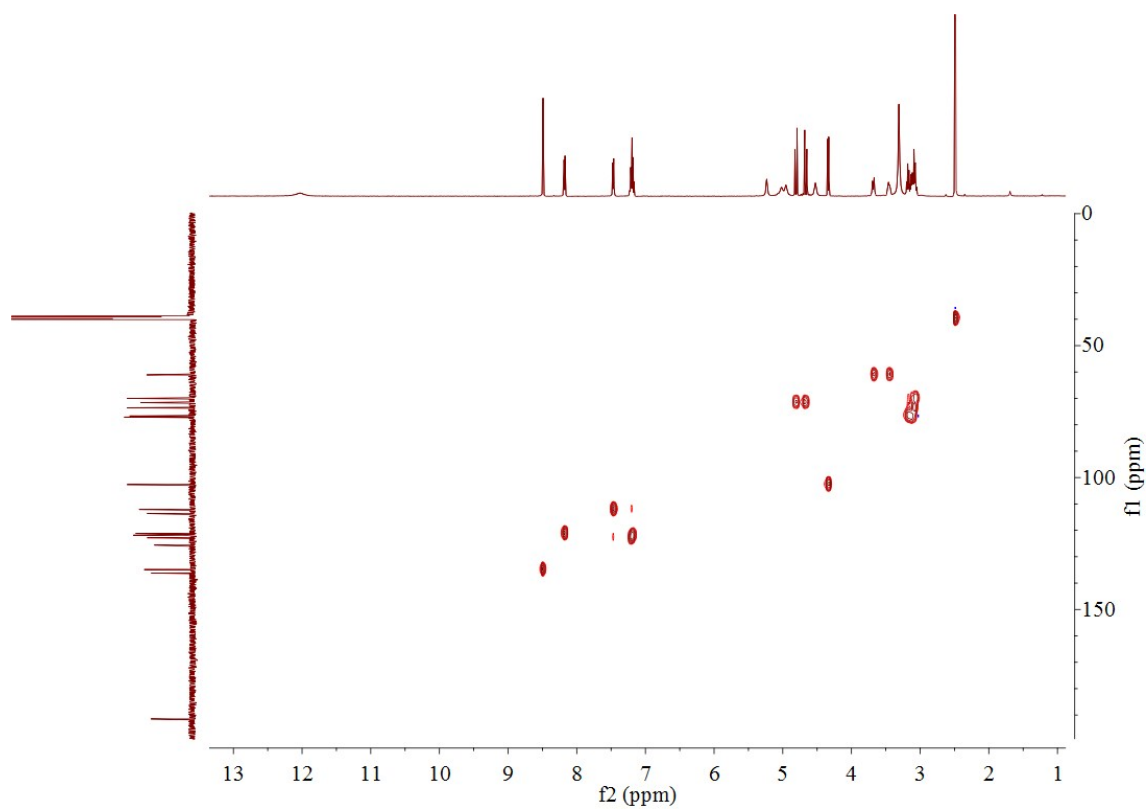

**Figure S47.** The HSQC spectrum of compound **7** in DMSO-*d*<sub>6</sub>

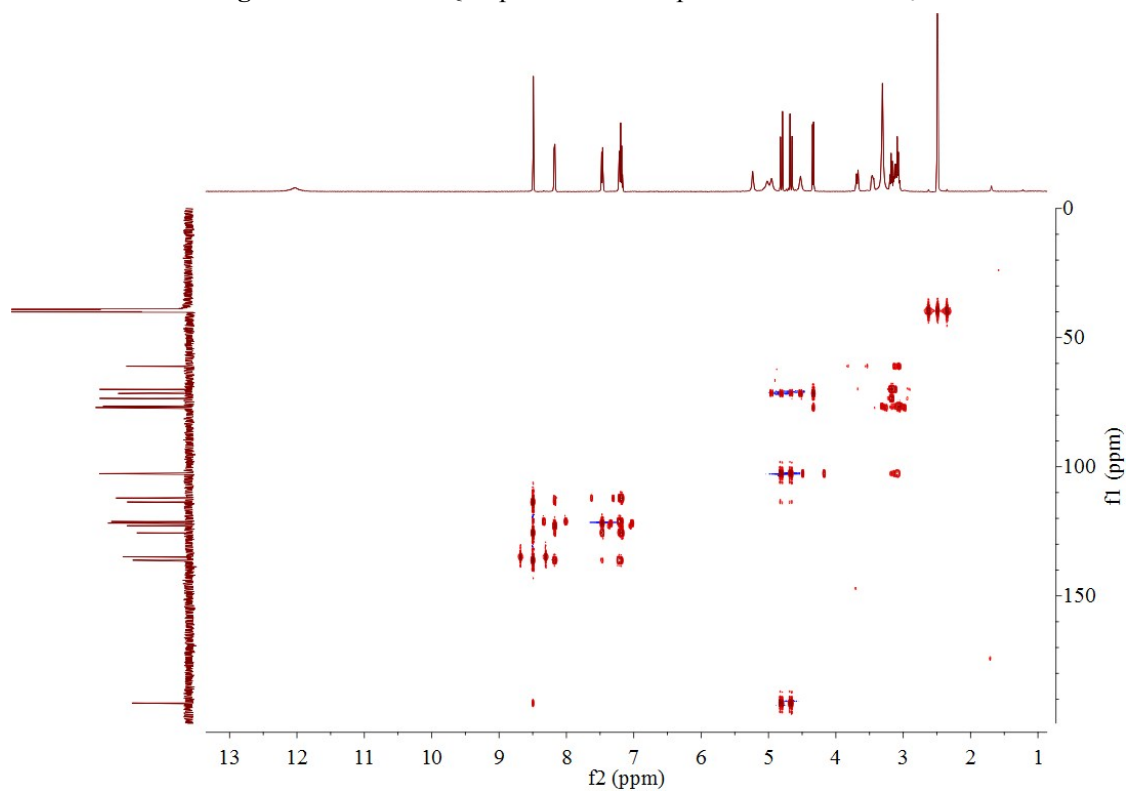

**Figure S48.** The HMBC spectrum of compound **7** in DMSO-*d*<sub>6</sub>

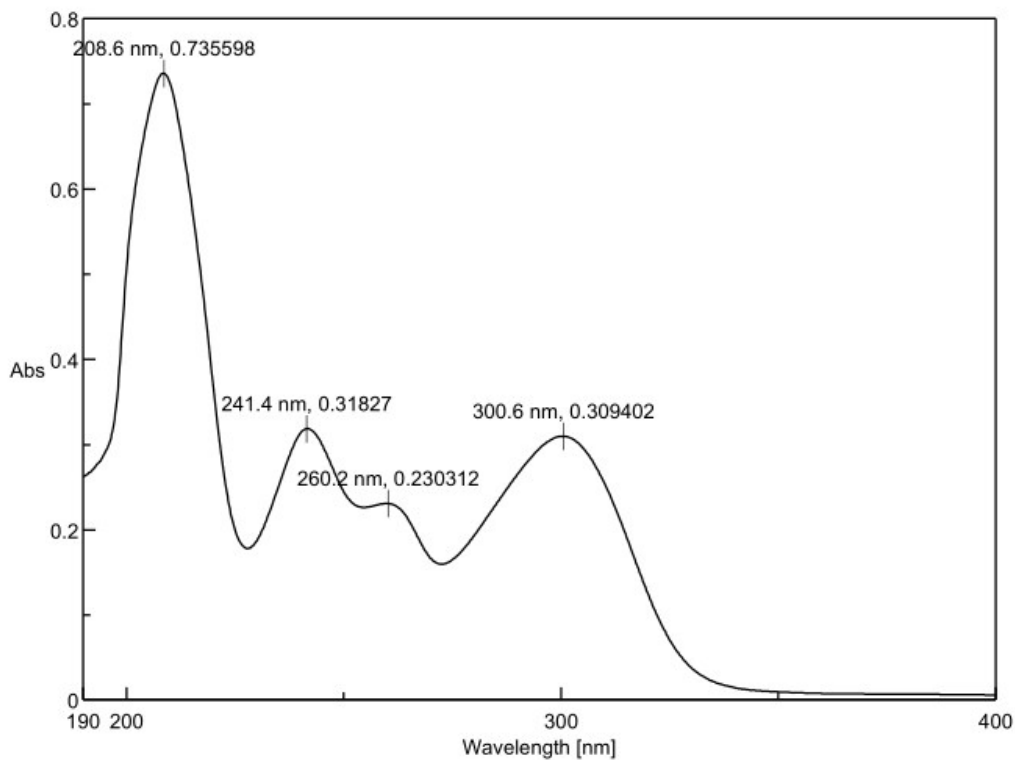

Figure S49. The UV spectrum of compound 7 in MeOH

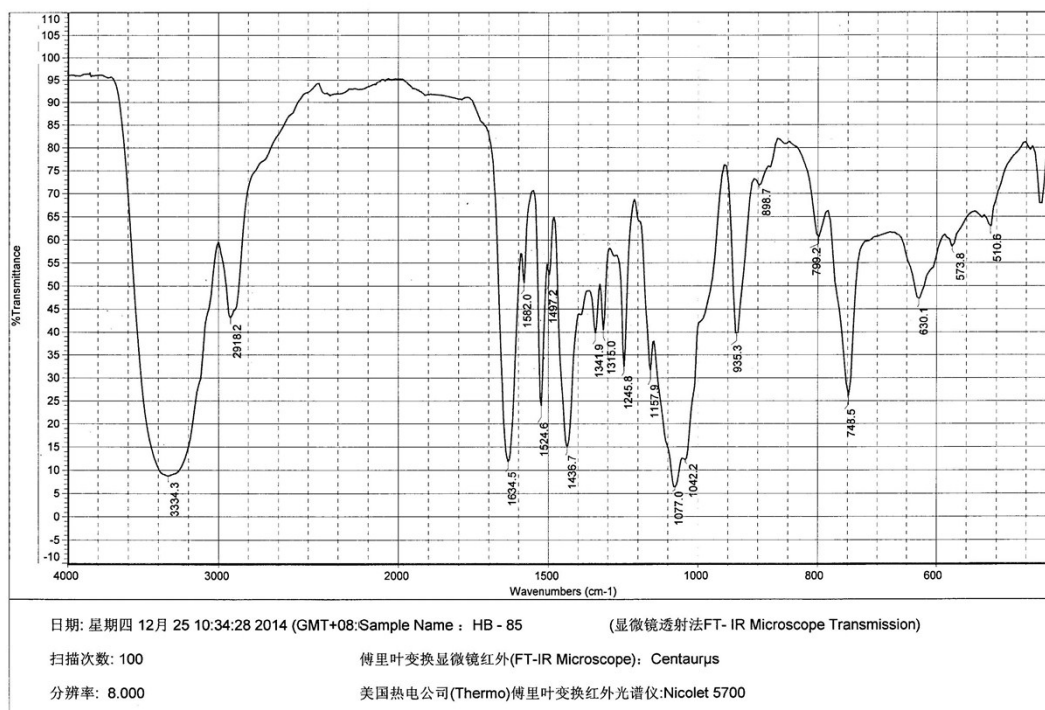

Figure S50. The IR spectrum of compound 7



## Qualitative Analysis Report

|                 |              |                        |            |
|-----------------|--------------|------------------------|------------|
| Data Filename   | 2014102403.d | Sample Name            | HB-85      |
| Sample Type     | Sample       | Position               | P1-C3      |
| Instrument Name | Instrument 1 | User Name              |            |
| Acq Method      | TEST LCMS.m  | IRM Calibration Status | XXXXXXXXXX |
| DA Method       | TEST LCMS.m  | Comment                |            |

### User Chromatograms

Fragmentor Voltage 135    Collision Energy 0    Ionization Mode ESI

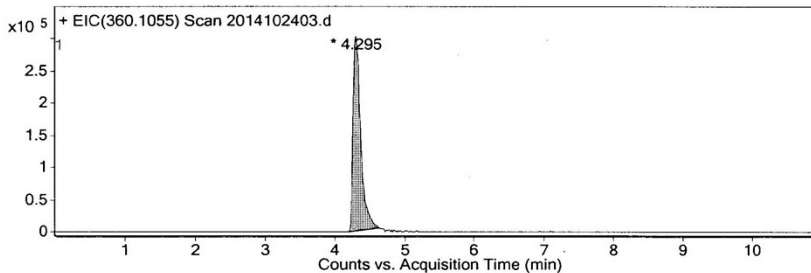

| Peak | Start | RT    | End   | Height | Area    | Area % |
|------|-------|-------|-------|--------|---------|--------|
| 1    | 4.182 | 4.295 | 4.633 | 301897 | 2357883 | 100    |

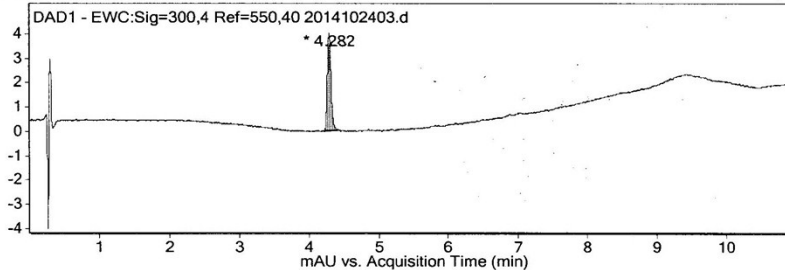

| Peak | Start | RT    | End   | Height | Area   | Area % |
|------|-------|-------|-------|--------|--------|--------|
| 1    | 4.202 | 4.282 | 4.427 | 4.01   | 14.569 | 100    |

### User Spectra

Fragmentor Voltage 135    Collision Energy 0    Ionization Mode ESI

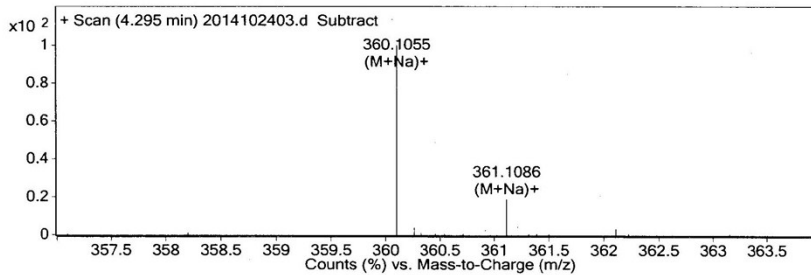

**Figure S51.** The HR-ESI-MS data of compound 7

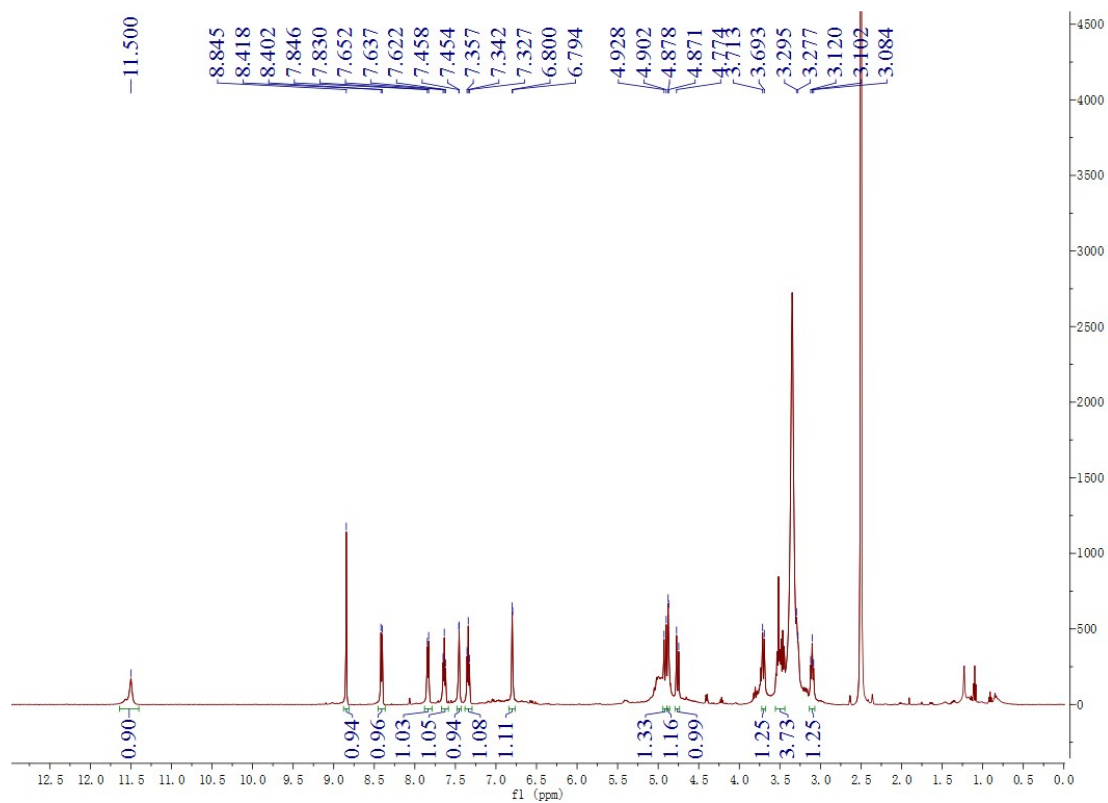

Figure S52. The  $^1\text{H}$  NMR spectrum of compound **8** in  $\text{DMSO-}d_6$

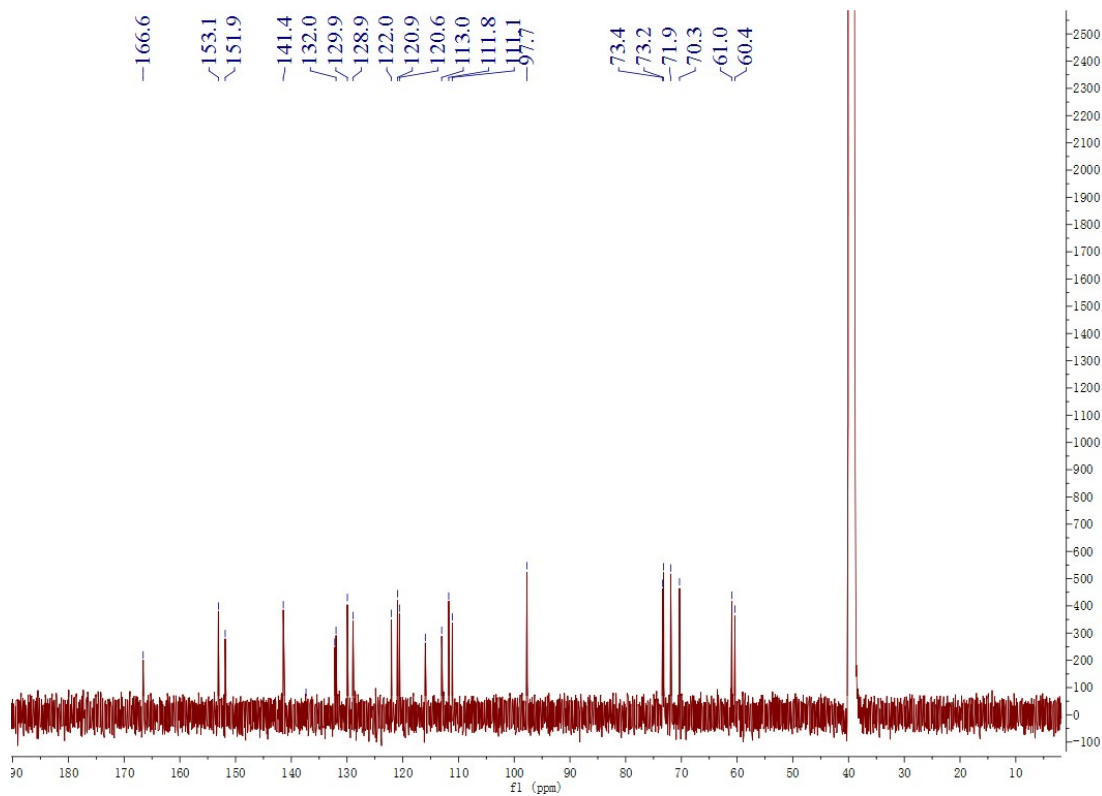

Figure S53. The  $^{13}\text{C}$  NMR spectrum of compound **8** in  $\text{DMSO-}d_6$

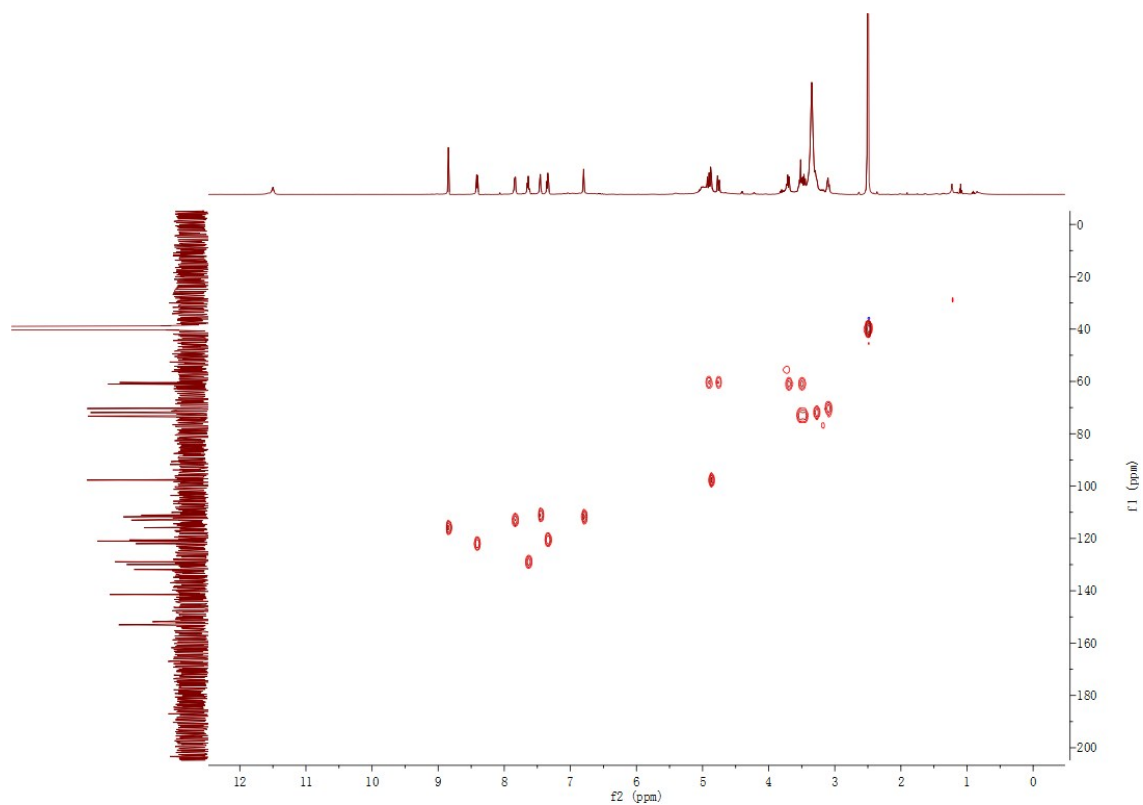

**Figure S54.** The HSQC spectrum of compound **8** in DMSO- $d_6$

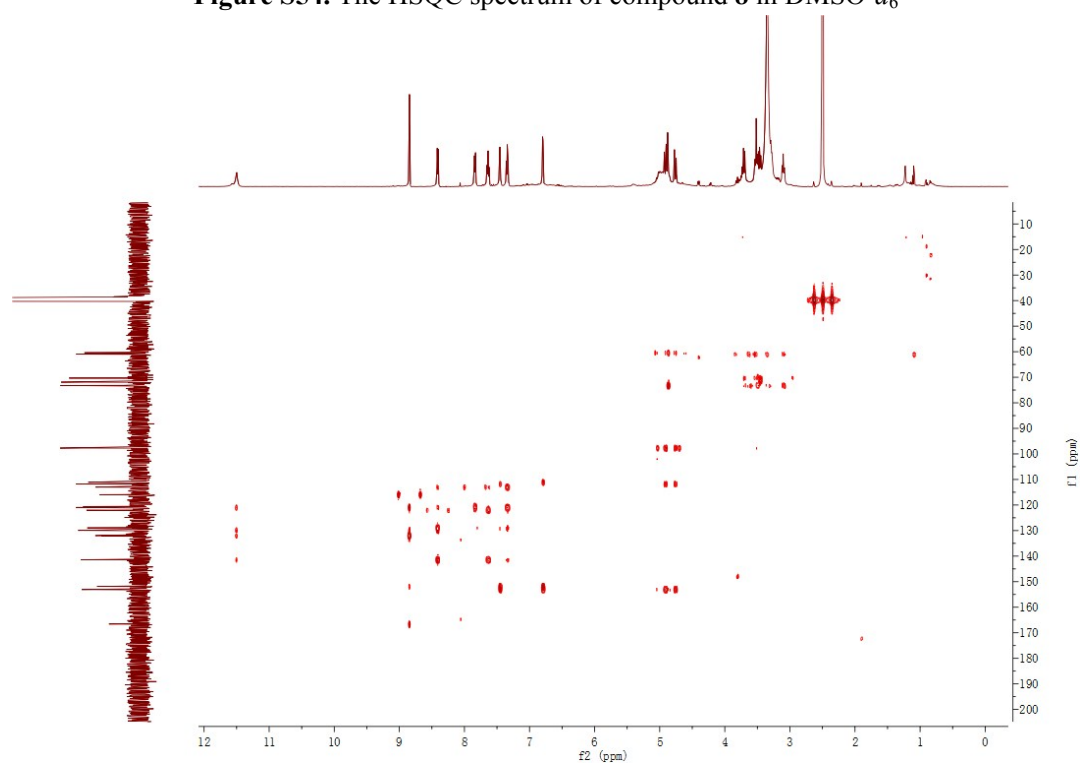

**Figure S55.** The HMBC spectrum of compound **8** in DMSO- $d_6$

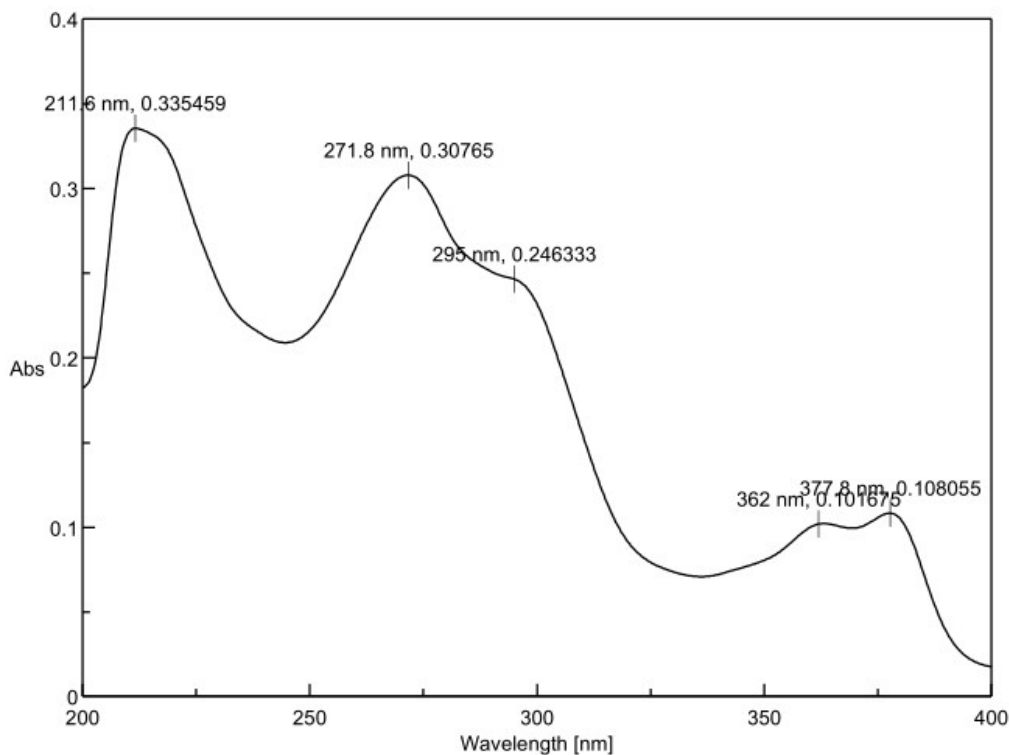

Figure S56. The UV spectrum of compound 8 in MeOH

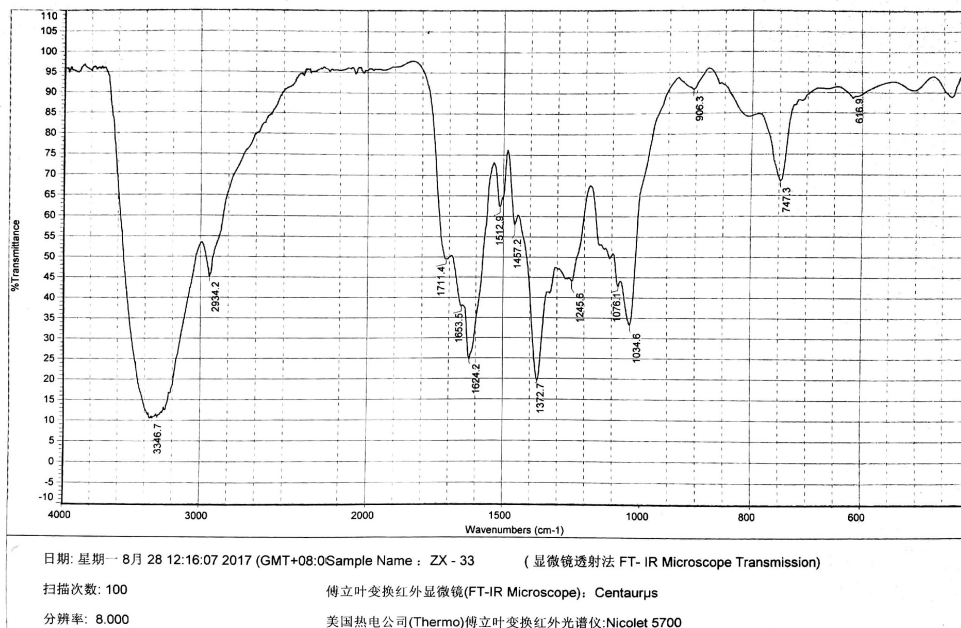

Figure S57. The IR spectrum of compound 8

Event#: 3 MS(E-) Ret. Time : 7.047 Scan#: 1328

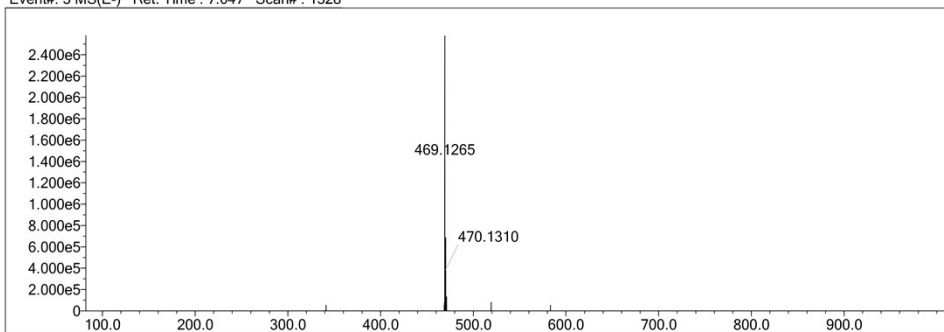

Measured region for 469.1265 m/z

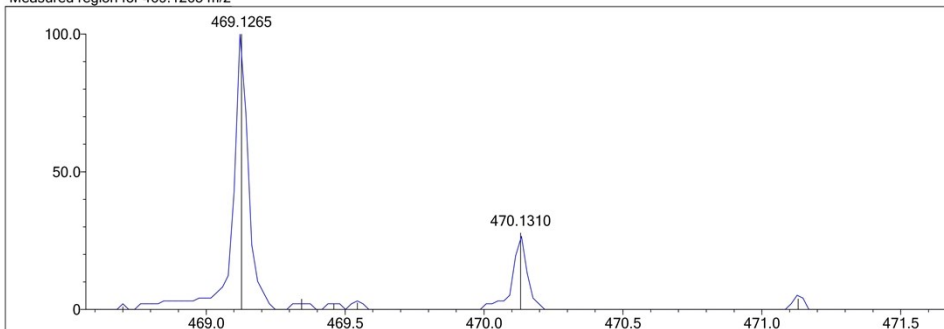

C23 H22 N2 O9 [M-H]- : Predicted region for 469.1253 m/z

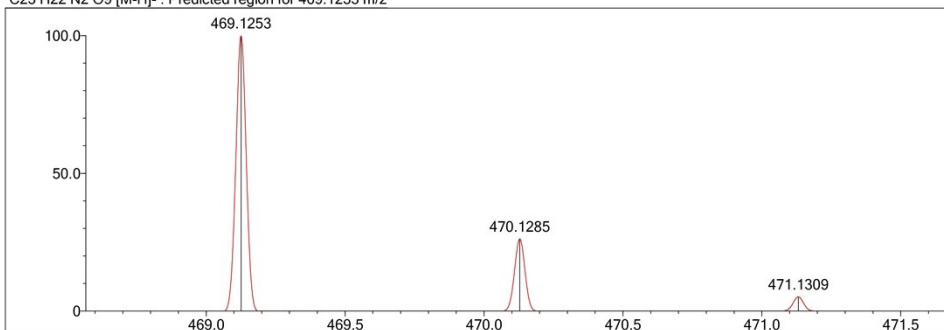

| Rank | Score | Formula (M)   | Ion    | Meas. m/z | Pred. m/z | Df. (mDa) | Df. (ppm) | Iso   | DBE  |
|------|-------|---------------|--------|-----------|-----------|-----------|-----------|-------|------|
| 1    | 87.76 | C23 H22 N2 O9 | [M-H]- | 469.1265  | 469.1253  | 1.2       | 2.56      | 91.32 | 14.0 |

Figure S58. The HR-ESI-MS data of compound 8

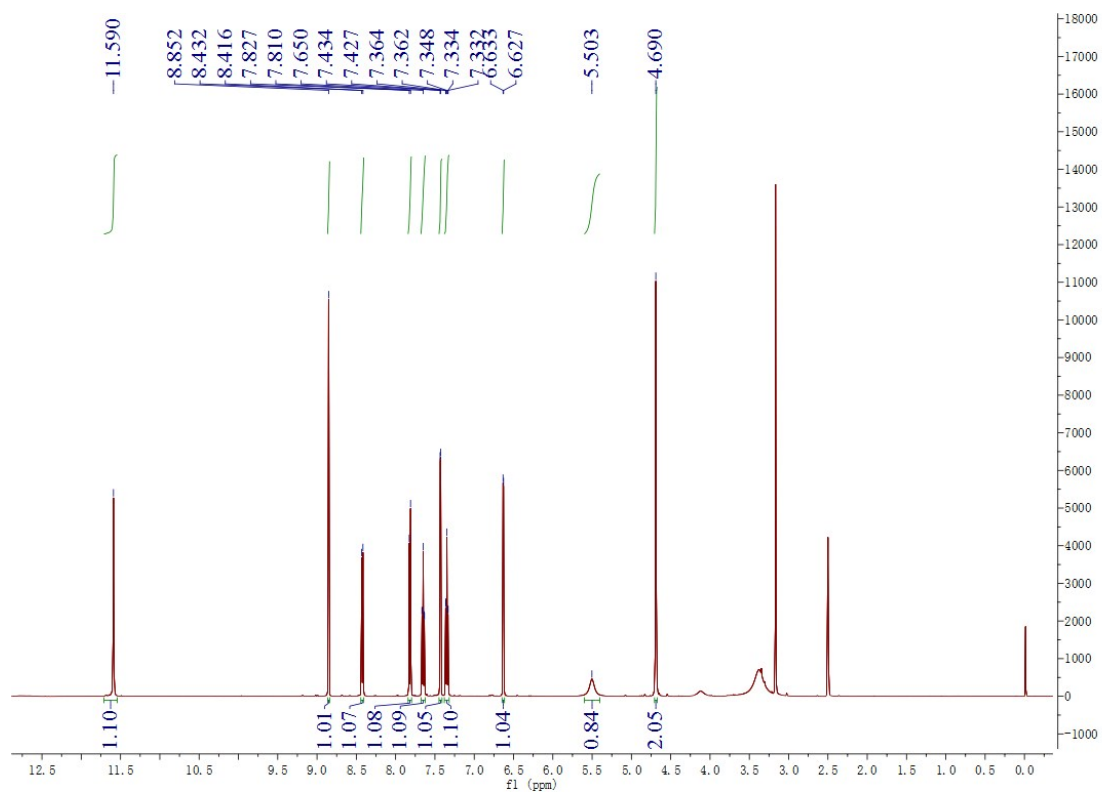

Figure S59. The  $^1\text{H}$  NMR spectrum of compound **9** in  $\text{DMSO-}d_6$

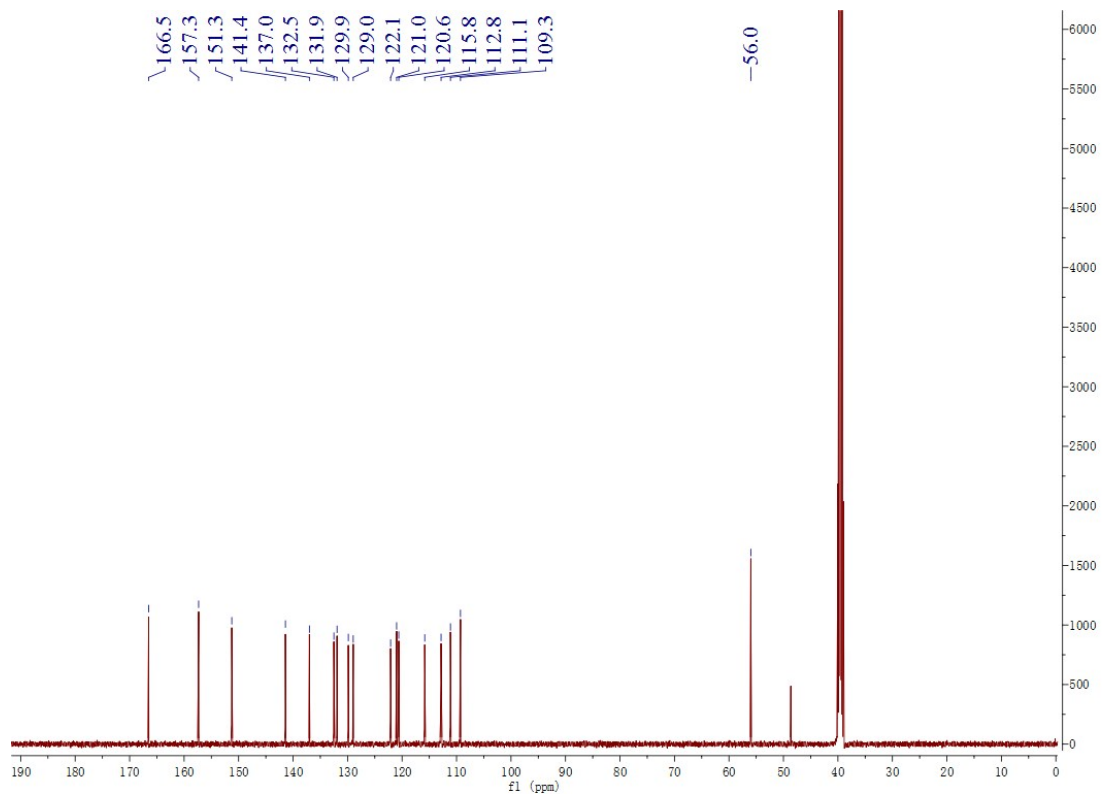

Figure S60. The  $^{13}\text{C}$  NMR spectrum of compound **9** in  $\text{DMSO-}d_6$

Thermo Qexactive Focus Report

compound NO. : ZX-7  
 Method : LCMS(compound)-low

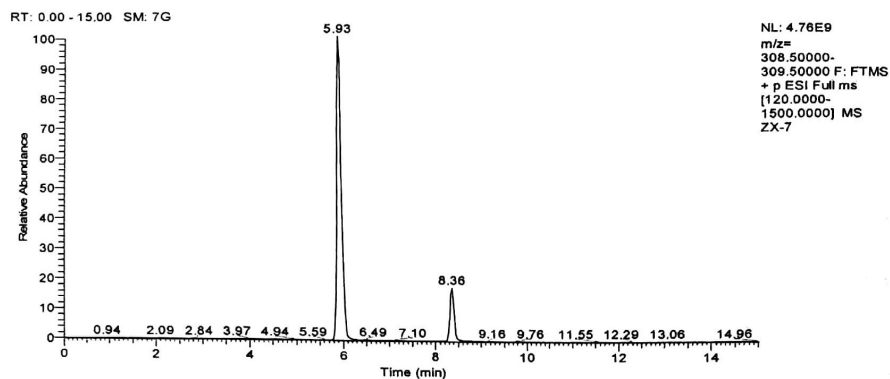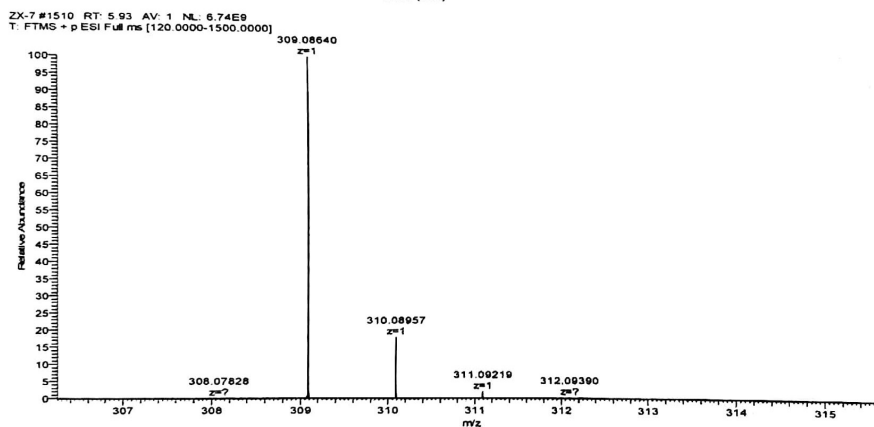

| m/z       | Theo. Mass | Delta (mmu) | RDB equiv. | Composition     |     |
|-----------|------------|-------------|------------|-----------------|-----|
| 309.08640 | 309.08592  | 0.48        | 14.5       | C16 H10 N6 Na   |     |
|           | 309.08698  | -0.58       | 12.5       | C17 H13 O4 N2   | M+H |
|           | 309.08726  | -0.86       | 14         | C18 H12 O N3 Na |     |

Figure S61. The HR-ESI-MS data of compound 9

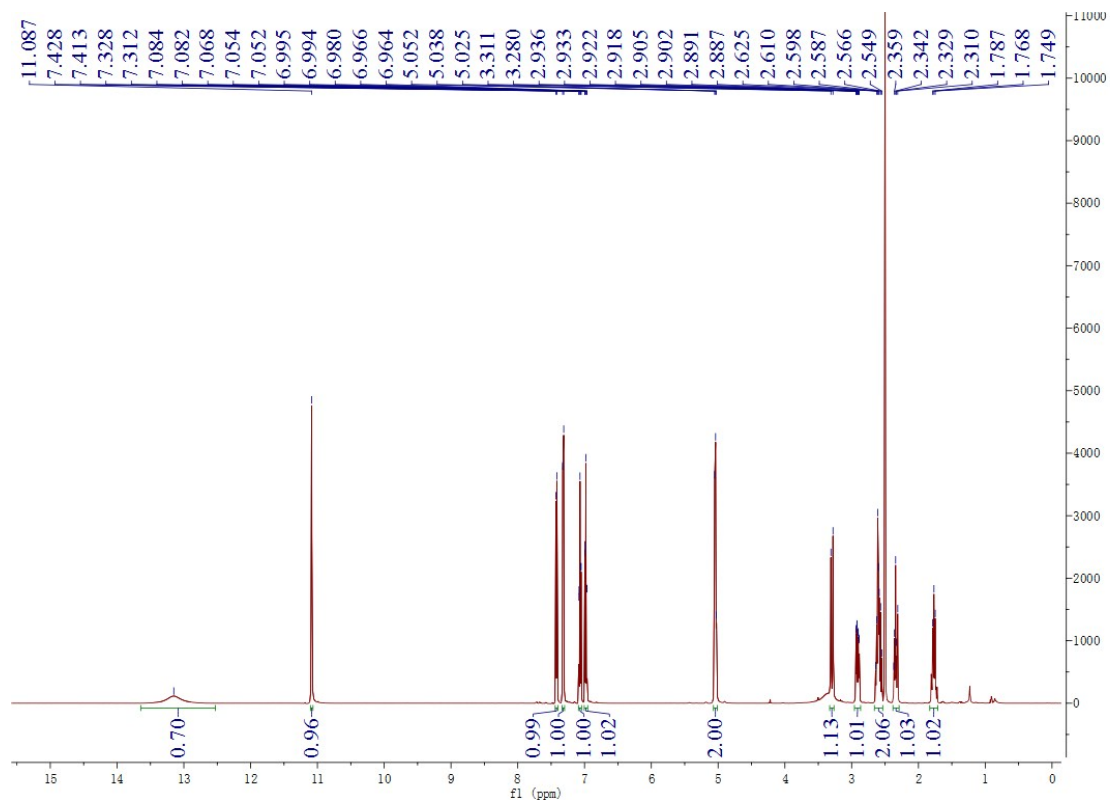

Figure S62. The  $^1\text{H}$  NMR spectrum of compound **10** in  $\text{DMSO-}d_6$

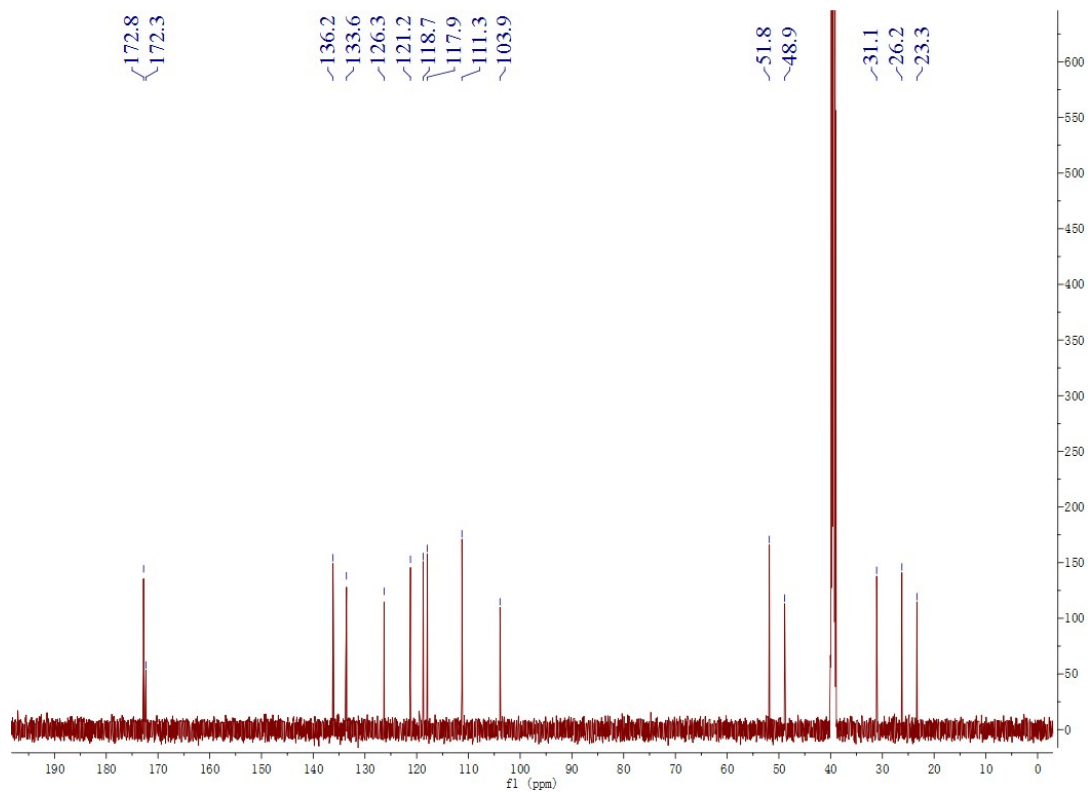

Figure S63. The  $^{13}\text{C}$  NMR spectrum of compound **10** in  $\text{DMSO-}d_6$



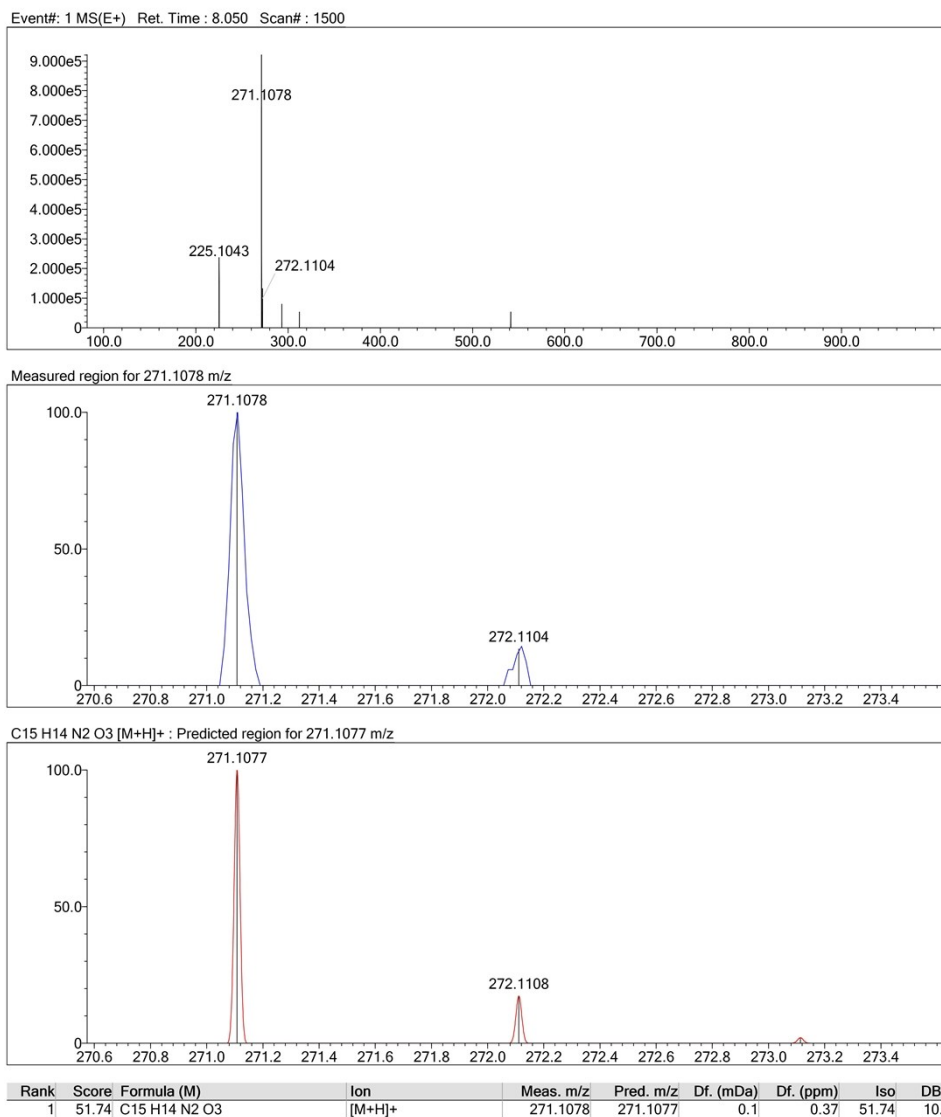

**Figure S64.** The HR-ESI-MS data of compound **10**

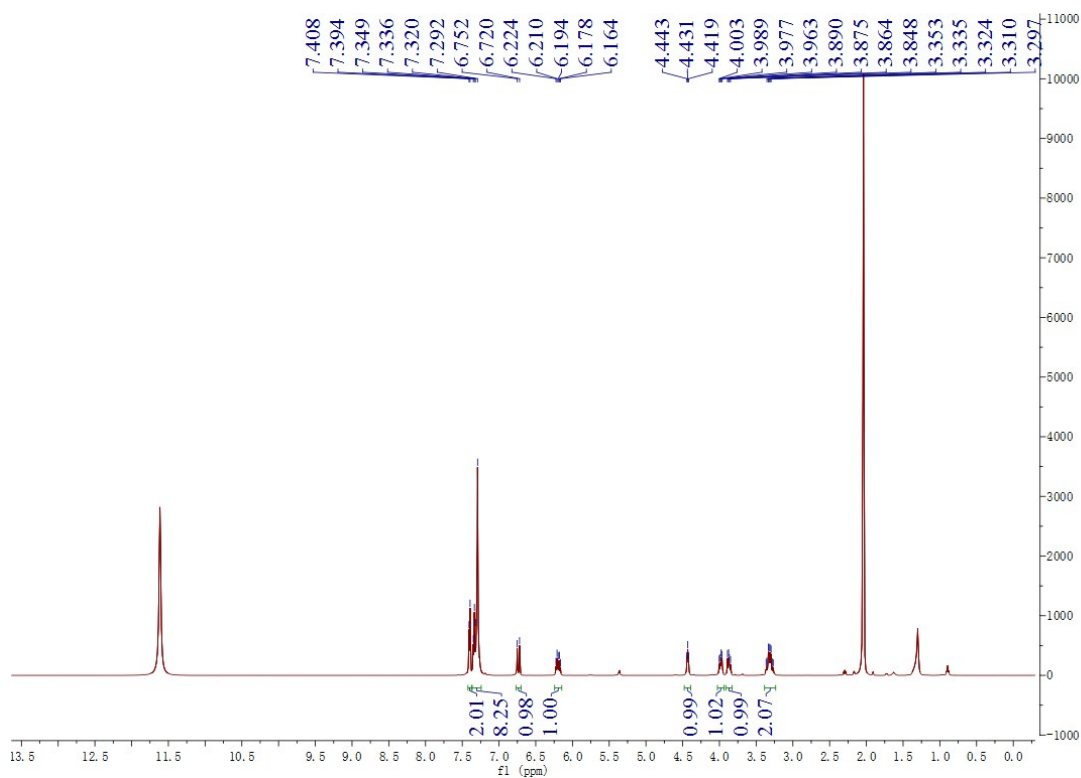

Figure S65. The  $^1\text{H}$  NMR spectrum of compound **1b** in acetic acid- $d_4$

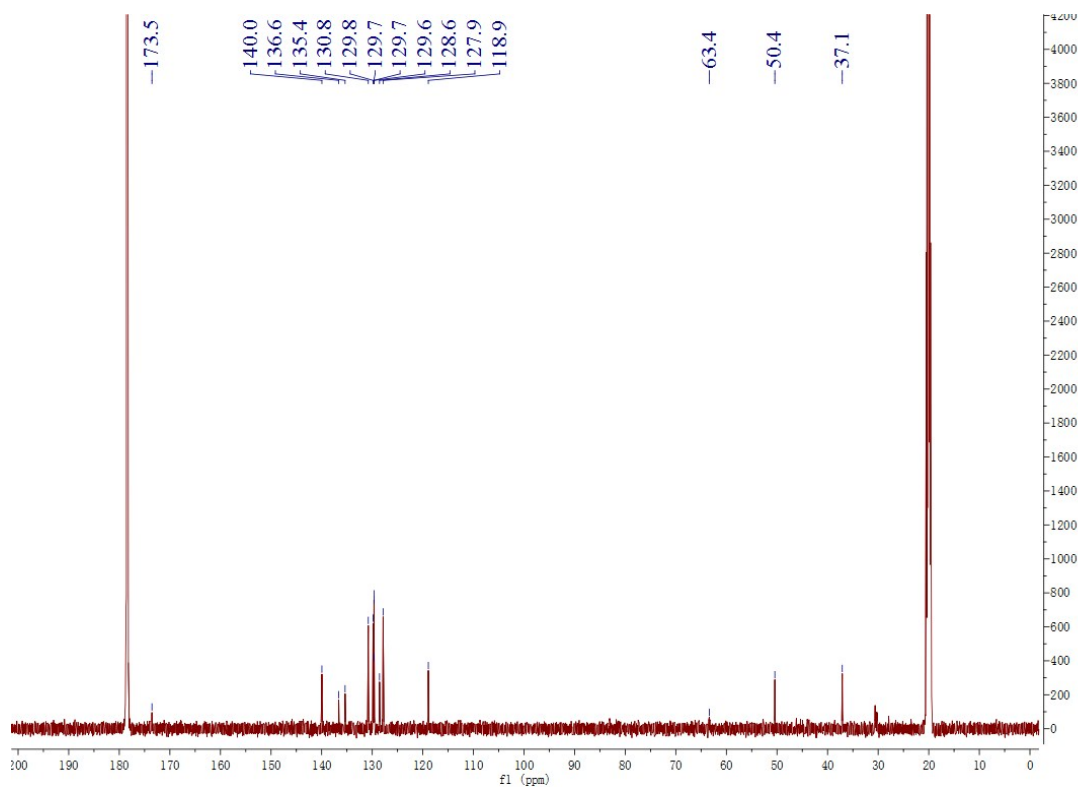

Figure S66. The  $^{13}\text{C}$  NMR spectrum of compound **1b** in acetic acid- $d_4$

Thermo Qexactive Focus Report

compound NO. : ZX-Ben-Tuo  
 Method : LCMS(compound)-low

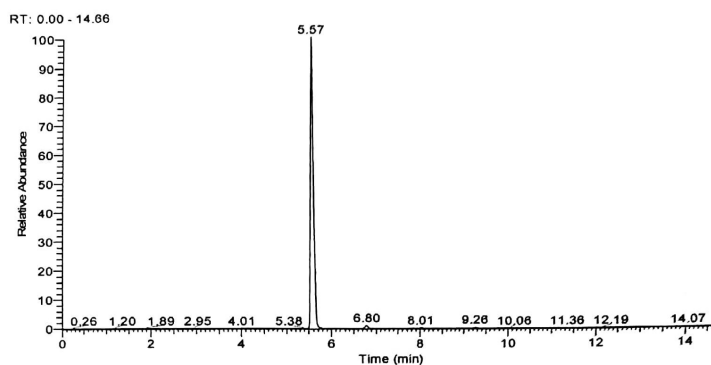

NL: 5.79E9  
 m/z= 281.50000-282.50000 F:  
 FTMS + p ESI Full ms  
 [120.0000-1500.0000]  
 MS  
 ZX-  
 BenTuo\_171123163131

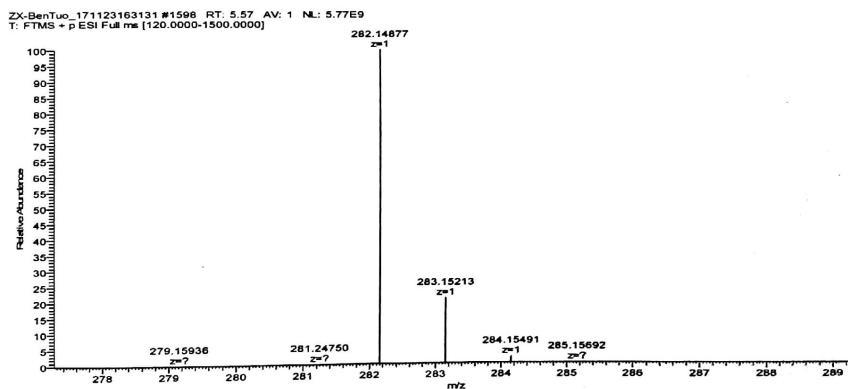

| m/z       | Theo. Mass | Delta (mmu) | RDB equiv. | Composition     |     |
|-----------|------------|-------------|------------|-----------------|-----|
| 282.14877 | 282.14886  | -0.09       | 9.5        | C18 H20 O2 N    | M+H |
|           | 282.14645  | 2.32        | 6.5        | C16 H21 O2 N Na |     |
|           | 282.14618  | 2.59        | 5          | C15 H22 O5      |     |
|           | 282.14377  | 5           | 2          | C13 H23 O5 Na   |     |

Figure S67. The HR-ESI-MS data of compound 1b

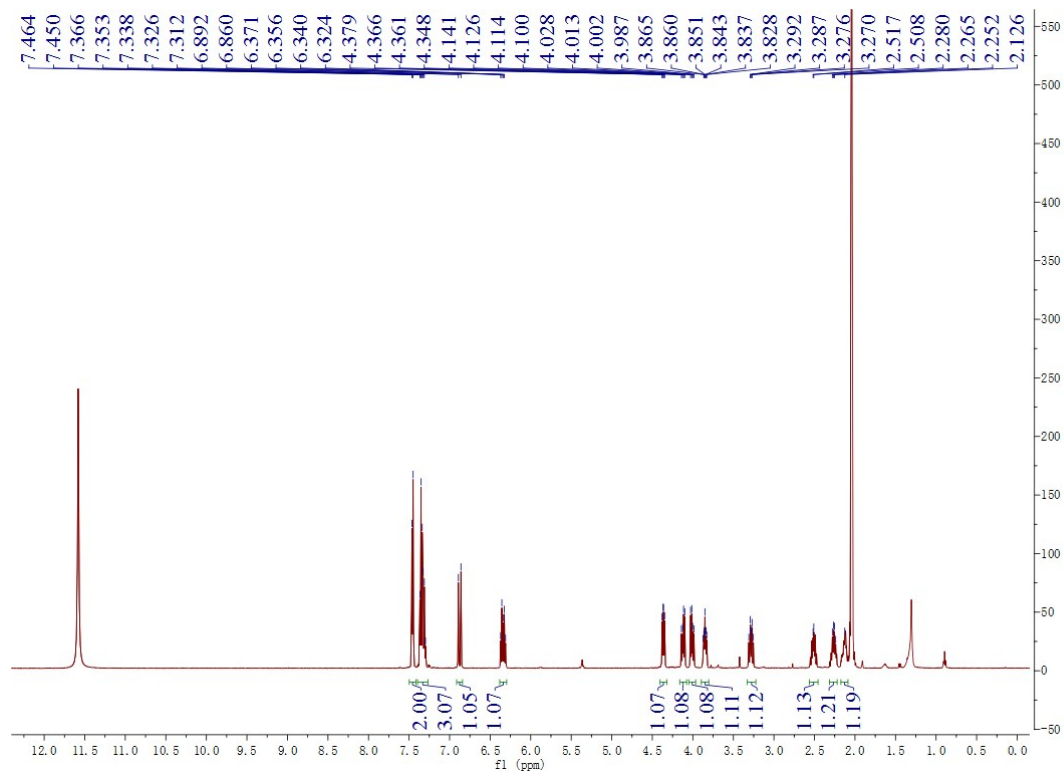

Figure S68. The  $^1\text{H}$  NMR spectrum of compound **2b** in acetic acid- $d_4$

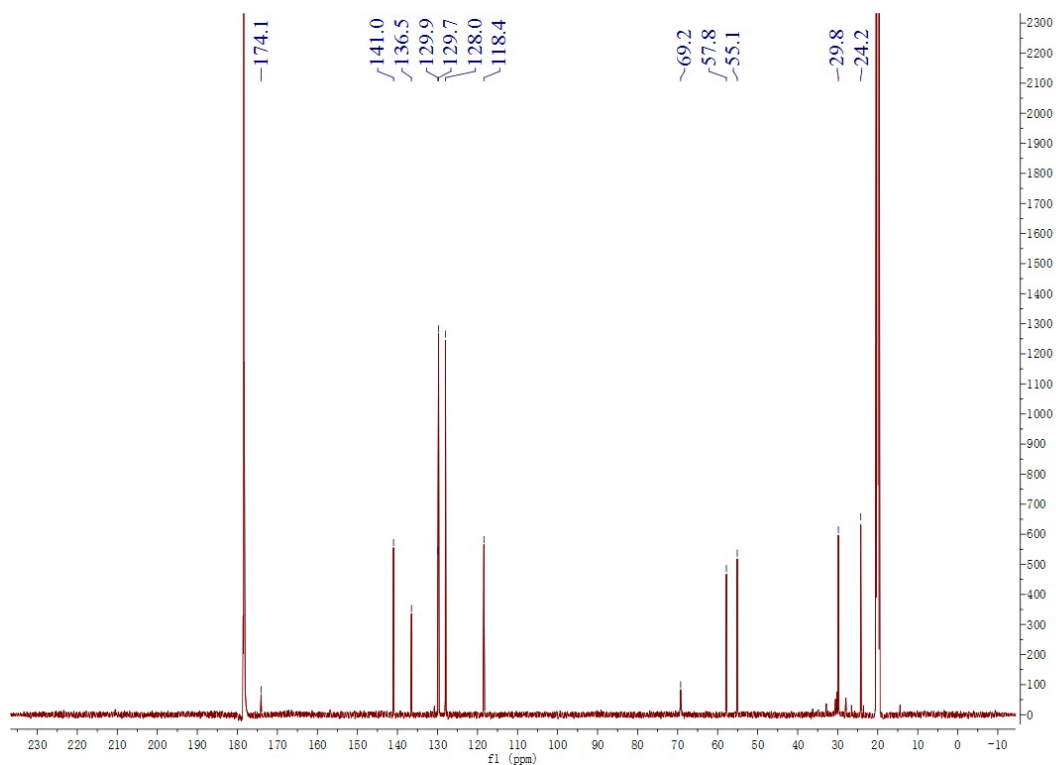

Figure S69. The  $^{13}\text{C}$  NMR spectrum of compound **2b** in acetic acid- $d_4$

Thermo Qexactive Focus Report

compound NO. : ZX-FuTuo  
 Method : LCMS(compound)-low

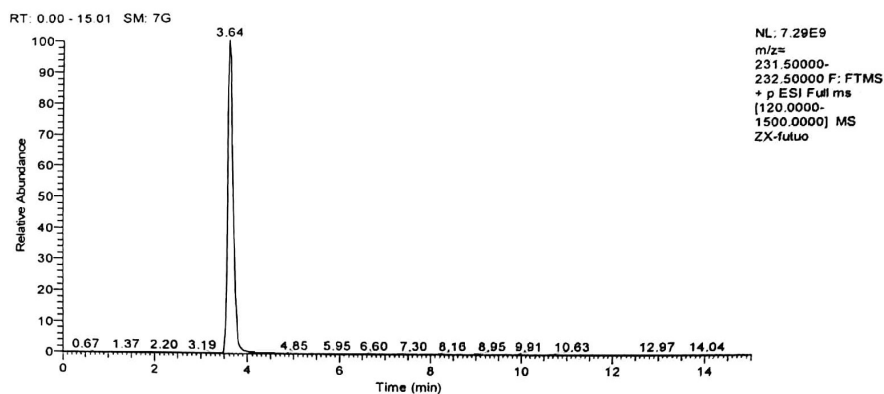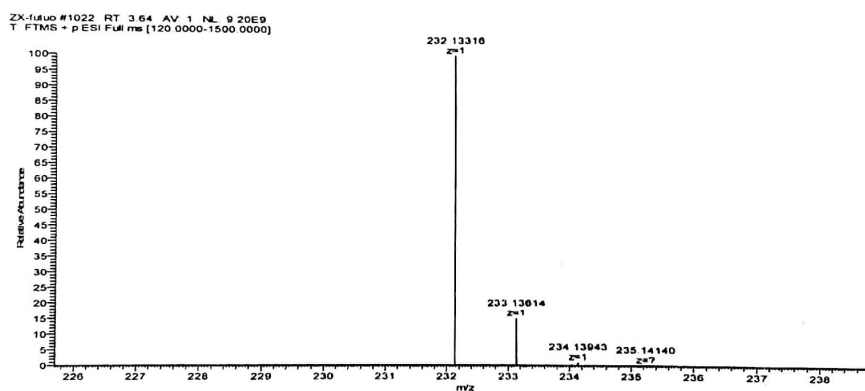

| m/z       | Theo. Mass | Delta (mmu) | RDB equiv. | Composition  |     |
|-----------|------------|-------------|------------|--------------|-----|
| 232.13316 | 232.13321  | -0.05       | 6.5        | C14 H18 O2 N | M+H |

Figure S70. The HR-ESI-MS data of compound 2b

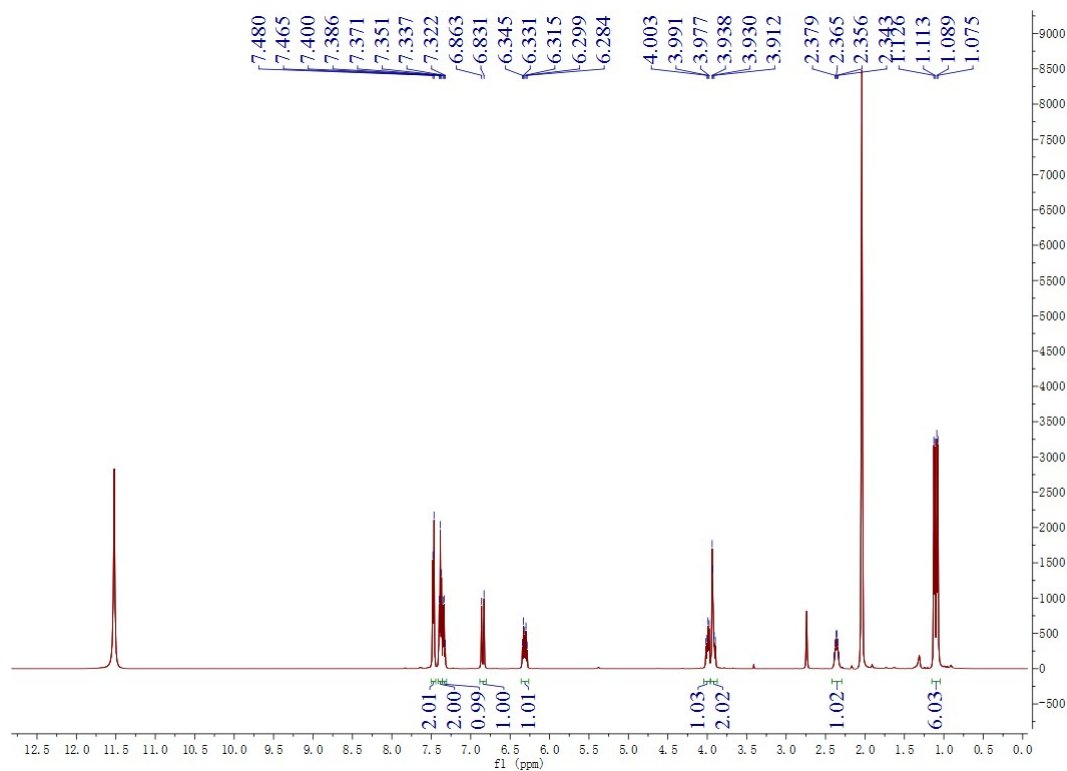

Figure S71. The  $^1\text{H}$  NMR spectrum of compound **3b** in acetic acid- $d_4$

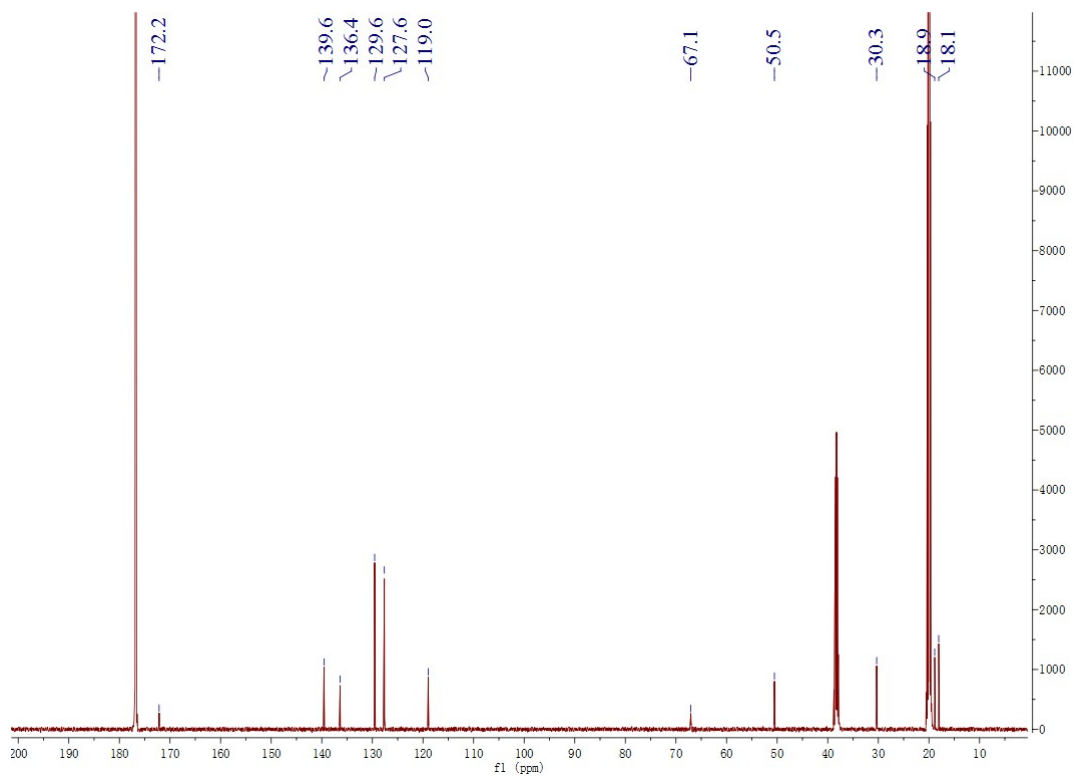

Figure S72. The  $^{13}\text{C}$  NMR spectrum of compound **3b** in acetic acid- $d_4$

Thermo Qexactive Focus Report

compound NO. : ZX-Xie-Tuo  
 Method : LCMS(compound)-low

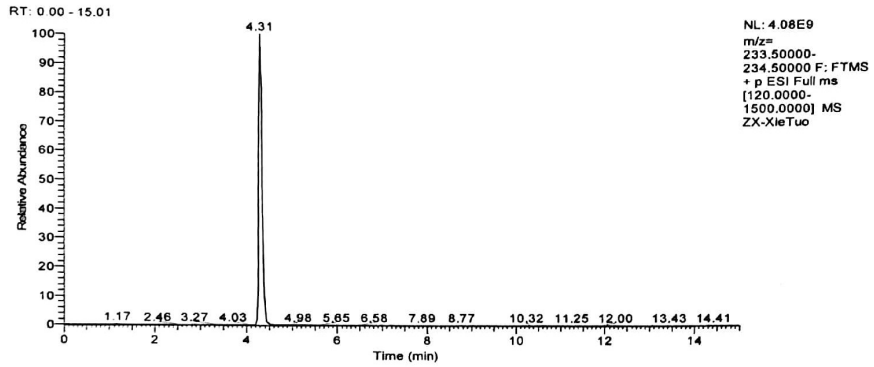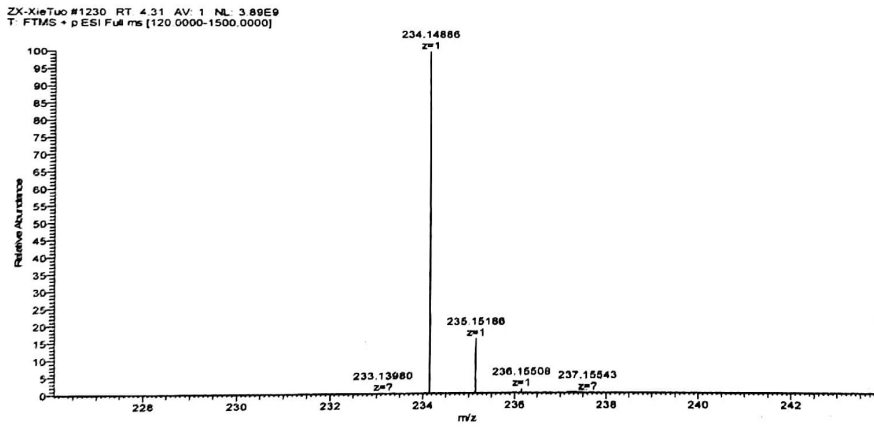

| m/z       | Theo. Mass | Delta (mmu) | RDB equiv. | Composition     |     |
|-----------|------------|-------------|------------|-----------------|-----|
| 234.14886 | 234.14886  | 0           | 5.5        | C14 H20 O2 N    | M+H |
|           | 234.14645  | 2.41        | 2.5        | C12 H21 O2 N Na |     |
|           | 234.14618  | 2.68        | 1          | C11 H22 O5      |     |

Figure S73. The HR-ESI-MS data of compound 3b

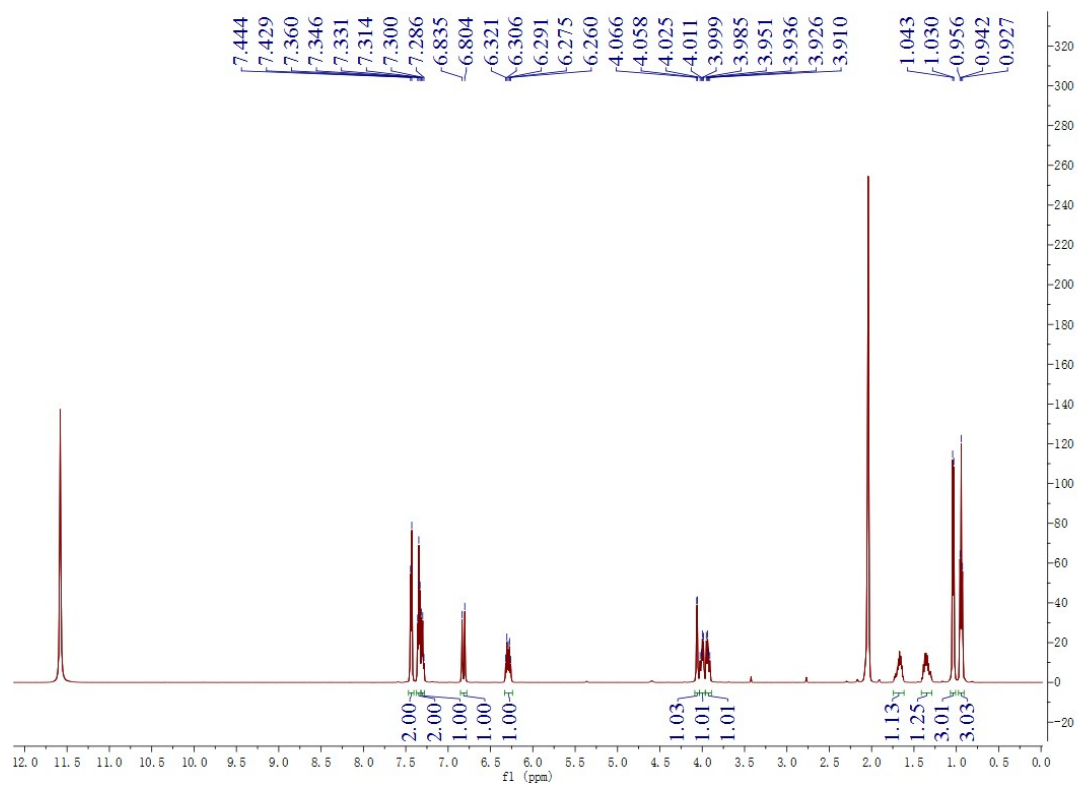

Figure S74. The  $^1\text{H}$  NMR spectrum of compound **4b** in acetic acid- $d_4$

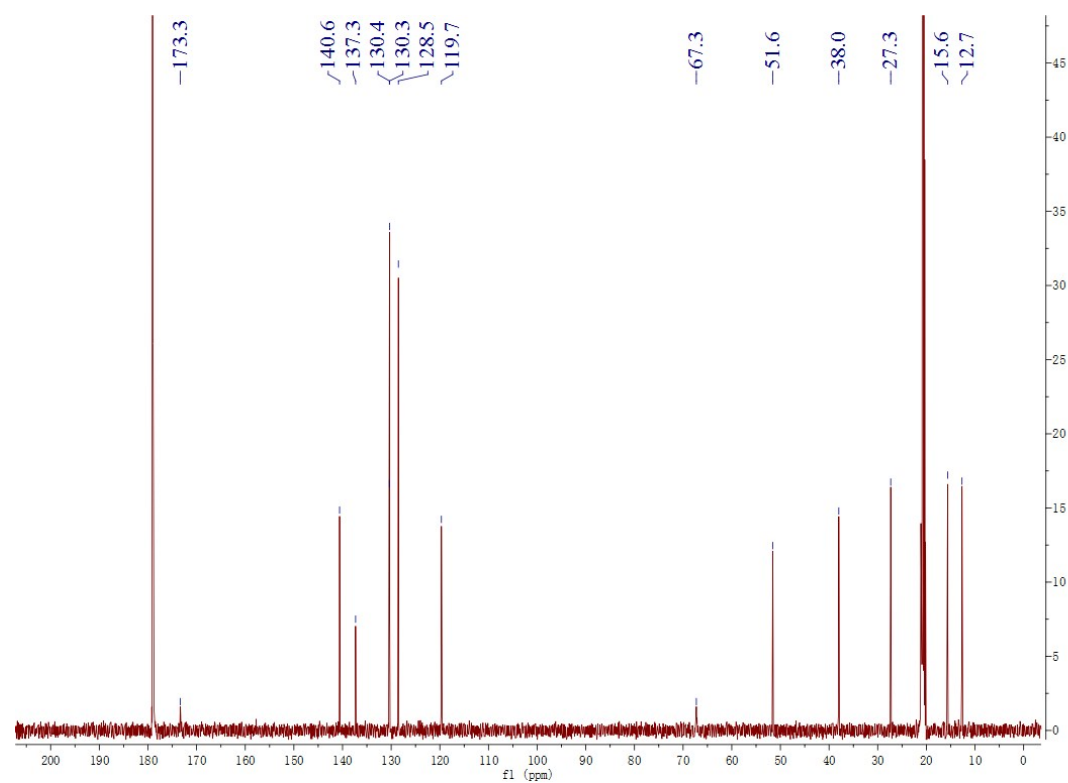

Figure S75. The  $^{13}\text{C}$  NMR spectrum of compound **4b** in acetic acid- $d_4$



Thermo Qexactive Focus Report

compound NO. : ZX-Yi-Tuo  
 Method : LCMS(compound)-low

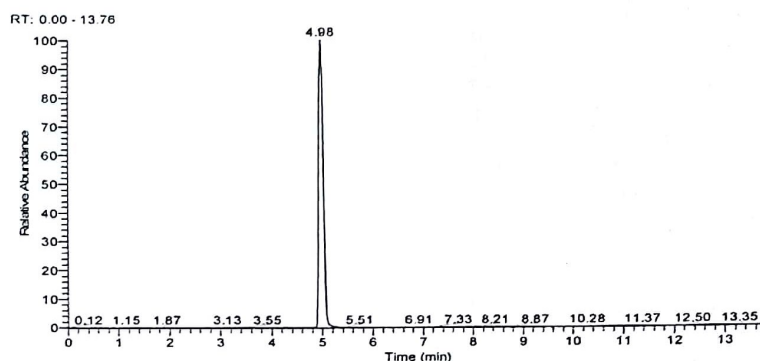

NL: 6.12E9  
 m/z=  
 247.50000-  
 248.50000 F: FTMS  
 + p ESI Full ms  
 [120.0000-  
 1500.0000] MS  
 ZX-YiTuo

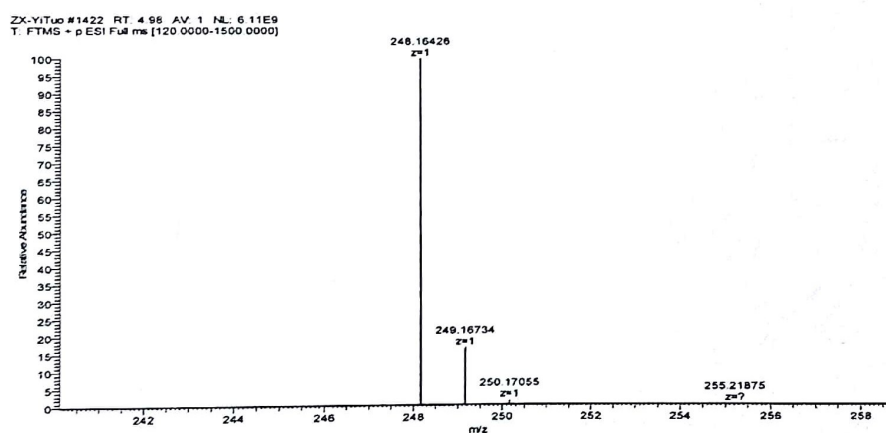

| m/z       | Theo. Mass | Delta (mmu) | RDB equiv. | Composition     |     |
|-----------|------------|-------------|------------|-----------------|-----|
| 248.16426 | 248.16451  | -0.25       | 5.5        | C15 H22 O2 N    | M+H |
|           | 248.16210  | 2.16        | 2.5        | C13 H23 O2 N Na |     |
|           | 248.16183  | 2.43        | 1          | C12 H24 O5      |     |

Figure S76. The HR-ESI-MS data of compound 4b

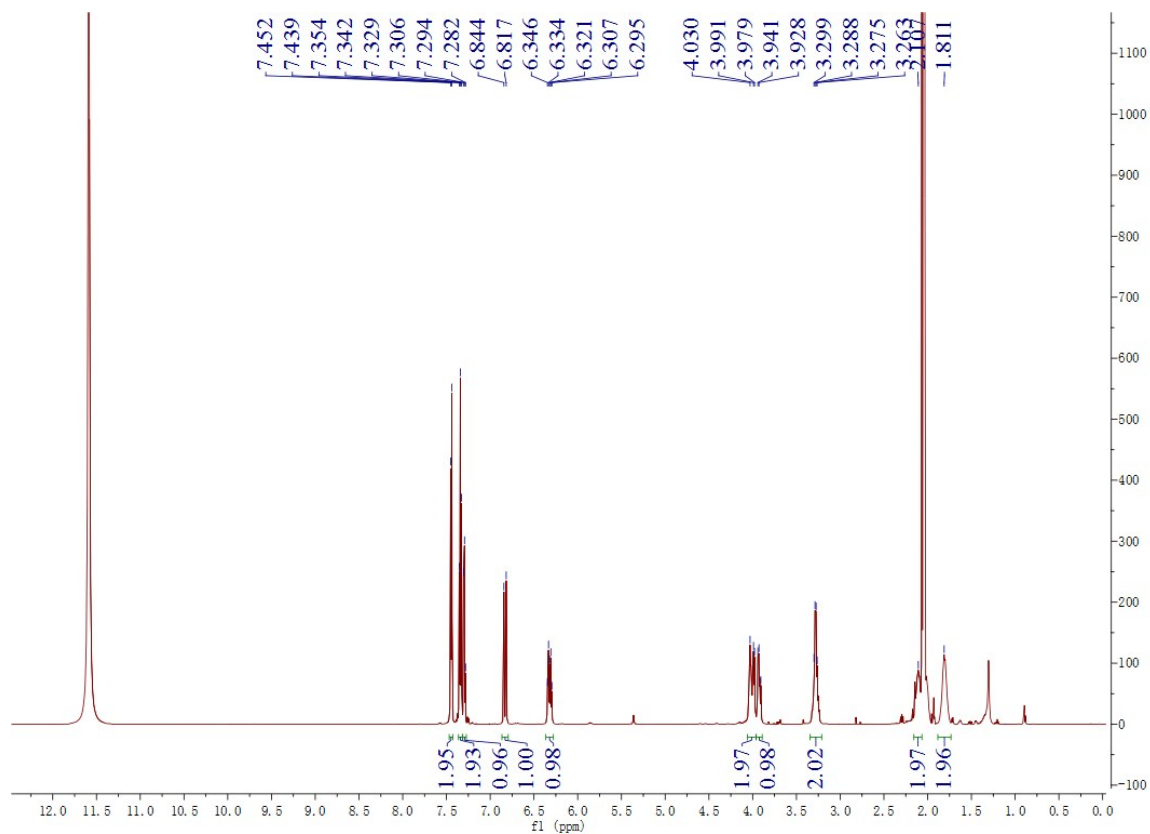

Figure S77. The  $^1\text{H}$  NMR spectrum of compound **5b** in acetic acid- $d_4$

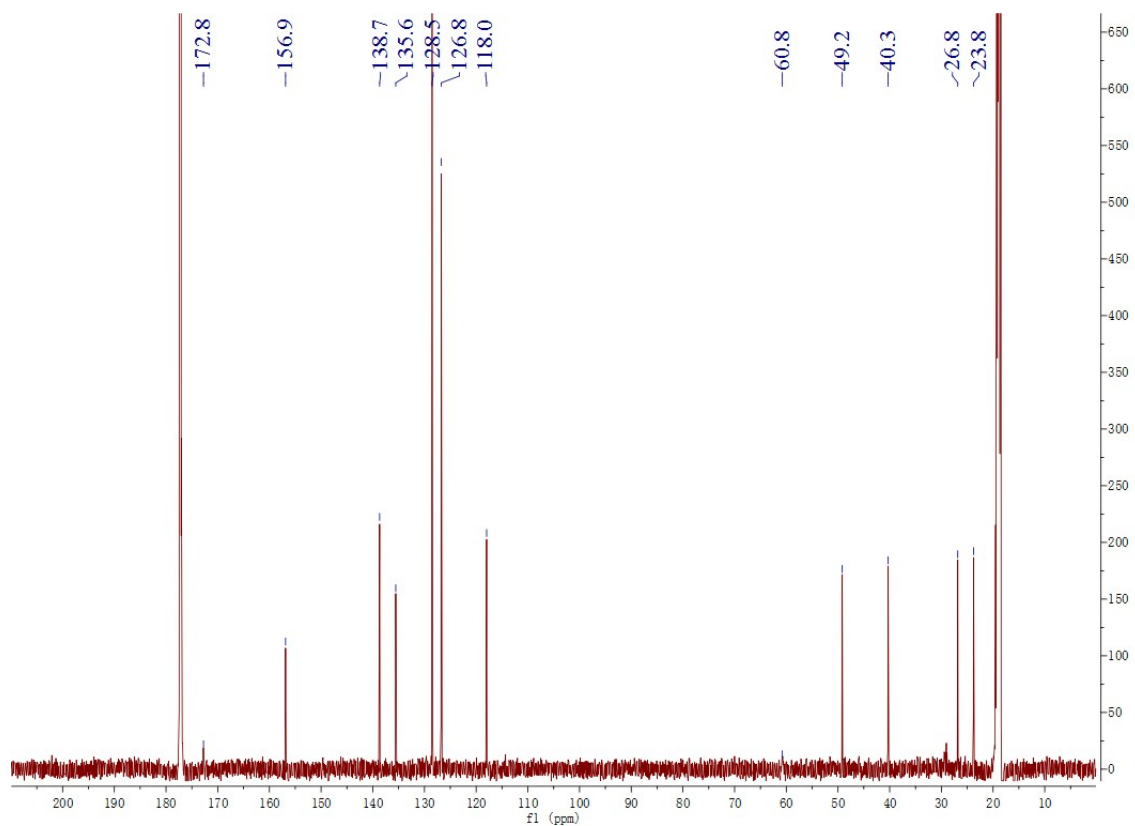

Figure S78. The  $^{13}\text{C}$  NMR spectrum of compound **5b** in acetic acid- $d_4$

Thermo Qexactive Focus Report

compound NO. : ZX-JingTuo  
 Method : LCMS(compound)-low

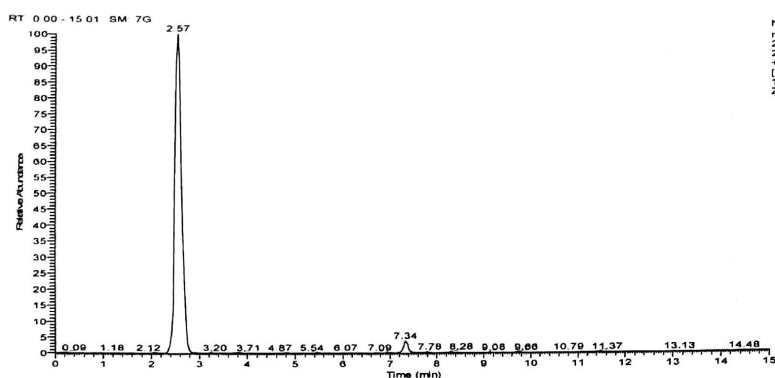

NL: 4 26E9  
 m/z: 290.50000  
 291.50000 F: FTMS  
 + p ESI Full ms  
 [120.0000-  
 1500.0000] MS  
 ZX-jingtuo

ZX-jingtuo #710 RT: 2.54 AV: 1 NL: 4 67E9  
 T: FTMS + p ESI Full ms [120.0000-1500.0000]

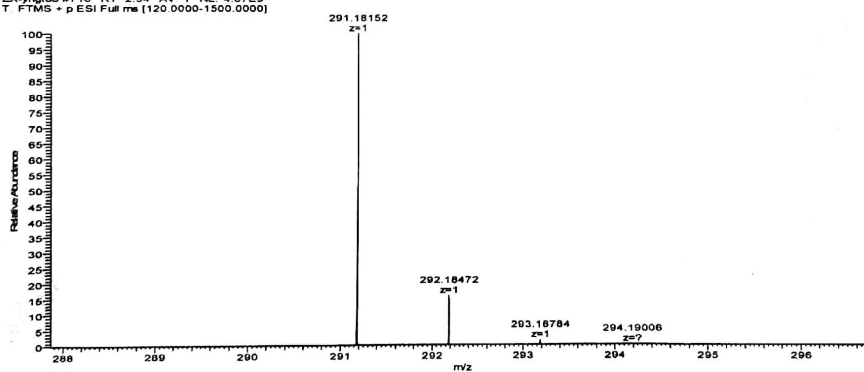

| m/z       | Theo. Mass | Delta (mmu) | RDB equiv. | Composition     |     |
|-----------|------------|-------------|------------|-----------------|-----|
| 291.18152 | 291.18155  | -0.03       | 6.5        | C15 H23 O2 N4   | M+H |
|           | 291.18049  | 1.03        | 3          | C15 H26 O3 N Na |     |
|           | 291.18022  | 1.3         | 1.5        | C14 H27 O6      |     |
|           | 291.18021  | 1.31        | 7          | C13 H21 O N7    |     |
|           | 291.1829   | -1.38       | 6          | C17 H25 O3 N    |     |

Figure S79. The HR-ESI-MS data of compound 5b

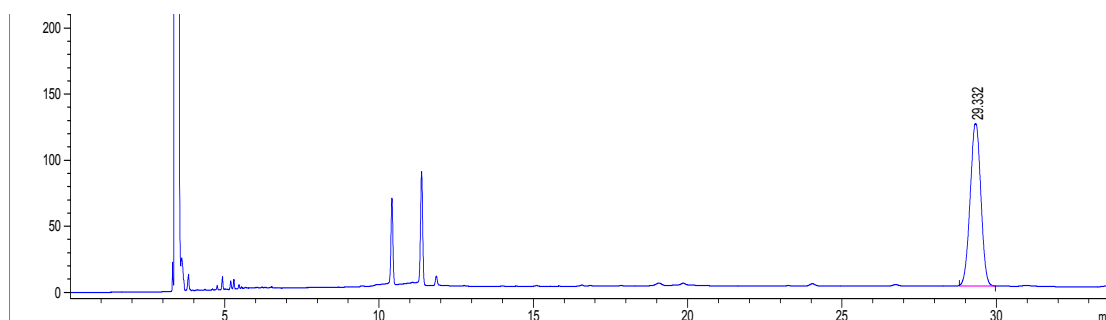

**Figure S80.** The Gas Chromatographic separation of D-Glc

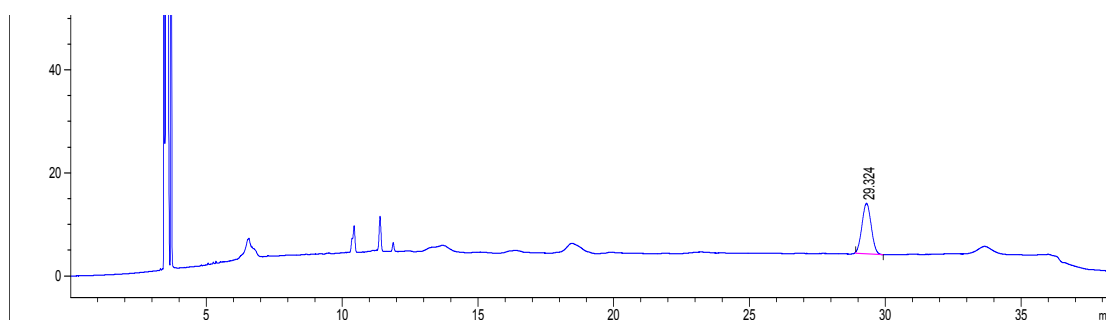

**Figure S81.** The Gas Chromatographic analyses of sugar moieties of compounds 7-8

**Table S82.** The neuroprotective effects of 1-10

|                               | Concentration | cell viability rate (%) |        |        | increase the cell viability rate | P           |
|-------------------------------|---------------|-------------------------|--------|--------|----------------------------------|-------------|
|                               |               | 1                       | 2      | 3      |                                  |             |
| Control                       |               | 100%                    | 100%   | 100%   |                                  |             |
| H <sub>2</sub> O <sub>2</sub> | 0.0034%       | 69.39%                  | 69.39% | 68.04% |                                  | 2.68265E-07 |
| edaravone                     | 10 $\mu$ M    | 81.97%                  | 93.96% | 89.42% | 24.16%                           | 0.042695737 |
| <b>1</b>                      | 10 $\mu$ M    | 59.46%                  | 63.56% | 60.38% | -11.32%                          | 0.004108491 |
| <b>2</b>                      | 10 $\mu$ M    | 68.89%                  | 72.38% | 72.86% | 3.55%                            | 0.141597005 |
| <b>3</b>                      | 10 $\mu$ M    | 71.40%                  | 77.91% | 70.80% | 6.41%                            | 0.12862467  |
| <b>4</b>                      | 10 $\mu$ M    | 68.71%                  | 69.25% | 67.53% | -0.65%                           | 0.547273969 |
| <b>5</b>                      | 10 $\mu$ M    | 67.82%                  | 72.88% | 66.29% | 0.06%                            | 0.9806331   |
| <b>6</b>                      | 10 $\mu$ M    | 70.32%                  | 72.02% | 69.02% | 2.19%                            | 0.198582198 |
| <b>7</b>                      | 10 $\mu$ M    | 56.97%                  | 60.50% | 55.61% | -16.33%                          | 0.001803455 |
| <b>8</b>                      | 10 $\mu$ M    | 68.69%                  | 67.36% | 66.90% | -1.87%                           | 0.139812224 |
| <b>9</b>                      | 10 $\mu$ M    | 92.83%                  | 96.89% | 93.55% | 32.55%                           | 0.008953877 |
| <b>10</b>                     | 10 $\mu$ M    | 70.32%                  | 72.02% | 69.02% | 2.19%                            | 0.198582198 |
